# Supplementary material for: Analysis of the Relationship between Official Rain-Praying Rituals and Droughts in China over the Past 2000 Years
Source: Copernicus journal article supplement (doi:10.5194/egusphere-2026-187), 2026-02-19
Supplement: Supplementary file 1 [file Table S1.xlsx]

## Sheet: Official Rainmaking Records
This data includes verbatim quotations from classical Chinese historical texts (e.g., Han Shu, Shi Ji). A direct translation of all entries entails two risks: 1) potential misinterpretation of ancient terminology, and 2) the loss of philological nuances crucial to historical research. The original text is therefore provided for verification or for scholars to conduct their own translations as nee…
	Source	Type	Chinese Original text	English Translation	The extracted time from the record (converted to the Gregorian calendar)	Year
1	History of the Han Dynasty (汉书)	Officials were dispatched to perform rain prayers	夏，旱。公孙卿曰：“黄帝时封则天旱，乾封三年。”上乃下诏：“天旱，意乾封乎？其令天下尊祠灵星焉。”	In the summer, a drought occurred. Gongsun Qing remarked, "In the time of the Yellow Emperor, when feng sacrifices were performed, it caused a drought, drying up the earth for three years." The emperor then issued an edict: "Does the drought signify a drying up of the earth? Let it be ordered that the Spirit Star be honored with sacrifices throughout the land."	141-87BC	141-87BC
2	History of the Han Dynasty (汉书)	The emperor personally performed rain prayers	其春。是岁旱。天子既出亡名，乃祷万里沙，过祠泰山。还至瓠子，自临塞决河，留二日，湛祠而去。	That spring, a drought occurred. The Son of Heaven, having traveled incognito, offered prayers at Wanli Sands, passed by and worshipped at Mount Tai. Upon returning to Hu Zi, he personally supervised the blocking of the breached river, remained there for two days, performed the submergence ritual, and then departed.	127BC	127BC
3	Records of the Grand Historian (史记)	Officials were dispatched to perform rain prayers	是岁小旱，上令官求雨，卜式言曰：“县官当食租衣税而已，今弘羊令吏坐市列肆，索隐曰谓吏坐市肆行列之市。贩物求利，亨弘羊，天乃雨。”	That year, there was a minor drought, and the emperor ordered officials to pray for rain. Bu Shi remarked: "Officials should merely collect rents and taxes for their sustenance. Now, Sang Hongyang has officials sit in the marketplaces among the rows of shops—[Soyin commentary: meaning officials sitting in the marketplaces among the rows of shops]—peddling goods to seek profit. Boil Sang Hongyang,…	110BC	110BC
4	History of the Han Dynasty (汉书)	The emperor personally performed rain prayers	始元六年夏，旱，大雩，不得举火。	In the summer of the sixth year of the Shiyuan era, a drought occurred, leading to the Great Yu ritual, during which no fires were allowed to be lit.	81BC	81BC
5	History of the Later Han Dynasty (后汉书)	The emperor personally performed rain prayers	建武三年七月，雒阳大旱，帝至南郊求雨，即日雨	In July of the third year of Jianwu, Luoyang suffered a severe drought. The emperor went to the southern suburbs to pray for rain, and it rained that very day.	27	27
6	History of the Later Han Dynasty (后汉书)	The emperor personally performed rain prayers	永平三年夏旱，而大起北宫，意诣阙免冠上疏曰：「伏见陛下以天时小旱，忧念元元，降避正殿，躬自克责，而比日密云，遂无大润……帝策诏报曰：「汤引六事，咎在一人。其冠履，勿谢。比上天降旱，密云数会，朕戚然慙惧，思获嘉应，故分布祷请，闚候风云，北祈明堂，南设雩塲。今又勑大匠止作诸宫，减省不急，庶消灾谴。」诏因谢公卿百僚，遂应时澍雨焉。	In the third year of the Yongping era, a summer drought occurred while the construction of the Northern Palace was in full swing. Zhong Yi went to the palace, removed his official cap, and submitted a memorial: "I observe that Your Majesty, concerned by the minor drought in weather, is anxious for the people. You have vacated the main hall and engaged in self-reflection, yet although clouds have …	60	60
7	History of the Later Han Dynasty (后汉书)	The emperor personally performed rain prayers+Officials were dispatched to perform rain prayers	永平四年春二月辛亥，诏曰："朕亲耕藉田，以祈农事。京师冬无宿雪，春不燠沐，烦劳群司，积精祷求。而比再得时雨，宿麦润泽。其赐公卿半奏。有司勉遵时政，务平刑罚。"	In the spring of the fourth year of the Yongping era, on the second month, Xinhai day, an edict was proclaimed: "I have personally plowed the sacred field to pray for agricultural prosperity. The capital has seen no lingering snow in winter and no warming rains in spring, causing officials to labor diligently, accumulating sincere prayers. Recently, timely rains have fallen again, nourishing the …	61.3.21	61
8	History of the Later Han Dynasty (后汉书)	Officials were dispatched to perform rain prayers	永平十八年四月己未，诏曰："自春已来，时雨不降，宿麦伤旱，秋种未下，政失厥中，忧惧而已。其赐天下男子爵，人二级，及流民无名数欲占者人一级；鳏、寡、孤、独、笃癃、贫不能自存者粟，人三斛。理冤狱，录轻系。二千石分祷五岳四渎。郡界有名山大川能兴云致雨者，长吏各洁斋祷请，冀蒙嘉澍。	On the day of Jiwei in the fourth month of the eighteenth year of the Yongping era, an imperial edict was proclaimed: "Since the beginning of spring, timely rains have not fallen, the winter wheat has been damaged by drought, and autumn crops have yet to be sown. This failure in governance reflects a deviation from proper balance, filling Us with deep concern and apprehension. We hereby bestow up…	75.5.15	75
9	History of the Later Han Dynasty (后汉书)	Officials were dispatched to perform rain prayers	建初五年二月甲申，诏曰："春秋书'无麦苗'，重之也。去秋雨泽不适，今时复旱，如炎如焚。凶年无时，而为备未至。朕之不德，上累三光，震栗忉忉，痛心疾首。前代圣君，博思咨诹，虽降灾咎，辄有开匮反风之应。令予小子，徒惨惨而已。其令二千石理冤狱，录轻系；祷五岳四渎，及名山能兴云致雨者，冀蒙不崇朝遍雨天下之报。务加肃敬焉。"	In the second month of the fifth year of the Jianchu era, on the day of Jiashen, an edict was issued: "The Spring and Autumn Annals records 'no wheat or seedlings,' emphasizing the gravity of such events. Last autumn, the rains were untimely, and now drought persists, scorching like fire. Disastrous years arrive without warning, yet our preparations remain insufficient. Our lack of virtue burdens…	80.3.14	80
10	History of the Later Han Dynasty (后汉书)	The emperor personally performed rain prayers	丙申晦，日有食之。五月庚子，京师大雩。	On the last day of the bingshen year, a solar eclipse occurred. On the gengzi day of the fifth month, a grand rain-praying ceremony was held in the capital.	113	113
11	History of the Later Han Dynasty (后汉书)	Officials were dispatched to perform rain prayers	阳嘉元年二月。京师旱。庚申，敕郡国二千石各祷名山岳渎，遣大夫、谒者诣嵩高、首阳山，并祠河、洛，请雨。	In the second month of the first year of the Yangjia era, a drought struck the capital. On the day Gengshen, an imperial decree commanded the two-thousand-dan officials of all commanderies and principalities to pray at renowned mountains and great rivers. Imperial clerks and court ushers were dispatched to Mount Songgao and Mount Shouyang to offer sacrifices at the Yellow River and the Luo River,…	132.3	132
12	History of the Later Han Dynasty (后汉书)	The emperor personally performed rain prayers	阳嘉元年二月戊辰，雩。	On the day Wuchen in the second month of the first year of the Yangjia era, a rain-making ceremony was held.	132.3.4	132
13	History of the Later Han Dynasty (后汉书)	Officials were dispatched to perform rain prayers	阳嘉元年二月甲戌诏曰：“政失厥和，阴阳隔并，冬鲜宿雪，春无澍雨。分祷祈请，靡神不萗。深恐在所慢违‘如在’之义，今遣侍中王辅等，持节分诣岱山、东海、荥阳、河、洛，尽心祈焉。”	In the second month of the first year of the Yangjia era, on the day Jiaxu, an imperial edict stated: "Governance has lost its harmony, with yin and yang in discord. Winter lacked enduring snow, and spring has seen no nourishing rain. Prayers and supplications have been offered to every deity without exception. Deeply concerned that local negligence may have disregarded the principle of 'as if pr…	132.3.11	132
14	History of the Later Han Dynasty (后汉书)	The emperor personally performed rain prayers+Officials were dispatched to perform rain prayers	阳嘉三年，是岁河南、三辅大旱，五谷灾伤，天子亲自露坐德阳殿东厢请雨，又下司隶、河南祷祀河神、名山、大泽。	In the third year of the Yangjia era, a severe drought struck Henan and the Three Metropolitan Regions, devastating the five grains. The Son of Heaven personally sat in the open eastern chamber of Deyang Hall to pray for rain. He further ordered the Directors of the Imperial Clan and the Governor of Henan to offer sacrifices to the River God, as well as to the famous mountains and great marshes.	134	134
15	History of the Later Han Dynasty (后汉书)	The emperor personally performed rain prayers	永熹元年夏四月壬申，雩。	On the renchen day of the fourth month in summer, during the first year of the Yongxi era, a rainmaking ceremony was held.	145.5.20	145.5.20
16	History of the Later Han Dynasty (后汉书)	The emperor personally performed rain prayers+Officials were dispatched to perform rain prayers	永嘉元年五月甲午，诏曰：朕以不德，托母天下，布政不明，每失厥中。自春涉夏，大旱炎赫，忧心京京，故得祷祈明祀，兾蒙润泽。前虽得雨，而宿麦颇伤；比日阴云，还复开霁。寤寐永叹，重怀惨结。将二千石、令长不崇宽和，暴刻之为乎？其令中都官系囚罪非殊死考未竟者，一切任出，以须立秋。郡国有名山大泽能兴云雨者，二千石长吏各洁齐请祷，竭诚尽礼。	On the day Jiayue in the fifth month of the first year of Yongjia, an imperial edict was proclaimed: "I, lacking in virtue, have been entrusted by my mother to govern the realm, yet my administration has been unclear, often failing to strike the right balance. From spring through summer, a severe drought has scorched the land, filling my heart with constant anxiety. Thus, I have prayed and offere…	145.6.11	145
17	History of the Later Han Dynasty (后汉书)	The emperor personally performed rain prayers	六月戊寅，大赦天下，改元延熹。延熹元年六月丙戌，分中山置博陵郡，以奉孝崇皇园陵。大雩。	On the Wuyin day of the sixth month, a general amnesty was granted throughout the land, and the era name was changed to Yanxi. In the sixth month of the first year of Yanxi, on the Bingxu day, Zhongshan was divided to establish Boling Commandery, in order to serve the imperial gardens and mausoleums of Emperor Xiaochong. A great rain-making sacrifice was held.	158.7.25	158
18	History of the Later Han Dynasty (后汉书)	The emperor personally performed rain prayers	延熹四年秋七月，京师雩。	In the autumn of the fourth year of Yanxi, during the seventh month, a rainmaking ceremony was held in the capital.	161.8	161
19	History of the Later Han Dynasty (后汉书)	The emperor personally performed rain prayers	熹平五年夏四月癸亥，大赦天下。……大雩。使侍御史行诏狱亭部，理冤枉，原轻系，休囚徒。	In the summer, the fourth month, on the day Guihai, in the fifth year of the Xiping era, a general amnesty was proclaimed throughout the empire. ... The Great Rain Sacrifice was performed. Imperial Clerk-in-Attendance was dispatched to the prisons in the various districts to review legal cases, redress injustices, release those held on minor charges, and grant reprieves to prisoners.	176.4.27-5.25	176
20	Three Kingdoms History (三国志)	The emperor personally performed rain prayers	魏明帝太和五年春正月，帝耕于藉田。自去冬十月至此月不雨，辛巳，大雩。	In the spring, the first month of the fifth year of the Taihe era of Emperor Ming of Wei, the emperor plowed the ritual field. From the tenth month of the previous winter until this month, there had been no rain. On the Xinsi day, a grand rain-seeking ceremony was held.	231	231
21	Records of Jin Dynasty (晋书)	The emperor personally performed rain prayers	晋武帝泰始七年闰五月，大雩，太官减膳。	In the seventh year of the Taishi era of Emperor Wu of Jin, during the intercalary month of May, a great rainmaking ceremony was held, and the imperial kitchens reduced the food provisions.	271.6.25-7.23	271
22	Records of Jin Dynasty (晋书)	The emperor personally performed rain prayers	泰始九年，自正月旱，至于六月，祈宗庙社稷山川。	In the ninth year of the Taishi era, from the first month to the sixth month, there was a drought, and prayers were offered at the ancestral temples, the altars of soil and grain, and the mountains and rivers.	273.7.2-273.7.31	273
23	Records of Jin Dynasty (晋书)	Officials were dispatched to perform rain prayers	晋武帝咸宁二年，春久旱。四月丁巳，诏曰：诸旱处广加祈请。	In the second year of the Xianning era under Emperor Wu of Jin, a prolonged drought occurred in spring. On the fourth day of the fourth month, an imperial decree stated: All drought-affected areas shall intensify prayers and supplications.	276 .5.1-276.5.29	276
24	Records of Jin Dynasty (晋书)	The emperor personally performed rain prayers	晋武帝咸宁二年五月庚午，始祈雨于社稷山川。六月戊子，获澍雨。此雩之旧典也。	On the Gengwu day of the fifth month in the second year of the Xianning era under Emperor Wu of Jin, prayers for rain were first offered to the gods of soil and grain, as well as the mountains and rivers. On the Wuzi day of the sixth month, timely rain was received. This follows the ancient tradition of the yu rain ceremony.	276.6.19	276
25	Records of Jin Dynasty (晋书)	The emperor personally performed rain prayers	太康三年四月又如之。	In the fourth month of the third year of Taikang, it happened again.	282.4.25-282.5.24	282
26	Records of Jin Dynasty (晋书)	The emperor personally performed rain prayers	太康十年二月又如之。	In the second month of the tenth year of Taikang, it happened again.	289.3.9-289.4.7	289
27	Records of Jin Dynasty (晋书)	The emperor personally performed rain prayers	太兴元年六月，旱，帝亲雩。	In the sixth month of the first year of the Taixing era, a drought occurred, and the emperor personally conducted the rain-making ceremony.	318	318
28	Records of Jin Dynasty (晋书)	The emperor personally performed rain prayers	晋成帝咸和九年六月乙卯，大旱，诏太官撤膳；省刑，恤孤寡，贬费节用。秋八月，大雩。自五月不雨，至于是月。	On the day Yimao in the sixth month of the ninth year of the Xianhe era (334 CE) during the reign of Emperor Cheng of Jin, a severe drought occurred. An imperial edict was issued ordering the court kitchen to reduce meals, judicial punishments to be minimized, orphans and widows to be provided for, and expenditures to be curtailed with frugal measures implemented. In the eighth month of autumn, t…	334	334
29	Records of Jin Dynasty (晋书)	Imperial clan members were dispatched to perform rain prayers+Officials were dispatched to perform rain prayers	时天旱，季龙遣其太子诣临漳西滏口祈雨，久而不降，乃令澄自行，即有白龙二头降于祠所，其日大雨方数千里。	During a drought, Shi Hu sent his crown prince to pray for rain at the Fukou west of Linzhang. After a long time without rain, he ordered Fotudeng to go himself. Immediately, two white dragons descended at the sacrificial site, and that day, heavy rain fell across thousands of miles.	335-338	335-338
30	Records of Jin Dynasty (晋书)	The emperor personally performed rain prayers	晋成帝咸康二年三月，旱，诏太官减膳，免所旱郡县繇役。戊寅，大雩。	In the third month of the second year of the Xiankang era of Emperor Cheng of Jin, a drought occurred. An edict was issued ordering the imperial kitchen to reduce meals and exempting the corvée labor in the drought-stricken counties. On the Wuyin day, a grand rain-making ceremony was held.	336.4.13	336
31	Records of Jin Dynasty (晋书)	The emperor personally performed rain prayers	晋穆帝永和元年五月戊寅，大雩。	On the fifth day of the fifth month in the first year of the Yonghe era during the reign of Emperor Mu of Jin, a grand rainmaking ceremony was held.	345.6.25	345
32	Records of Jin Dynasty (晋书)	The emperor personally performed rain prayers	晋穆帝永和八年秋七月，大雩。	In the autumn, the seventh month of the eighth year of the Yonghe era of Emperor Mu of Jin, a grand rain-making ceremony was held.	352.7.28-8.26	352
33	The Southern History (南史)	The emperor personally performed rain prayers	南朝宋文帝元嘉八年三月，大雩。	In March of the eighth year of the Yuanjia era during the reign of Emperor Wen of the Southern Song Dynasty, a grand rainmaking ceremony was held.	431.3.29-4.27	431
34	The Southern History (南史)	The emperor personally performed rain prayers	南朝宋文帝元嘉八年夏六月己丑，大赦，旱故。又大雩。	On the summer solstice of the eighth year of the Yuanjia era during the reign of Emperor Wen of the Liu Song dynasty, a general amnesty was declared due to the drought. Additionally, the Great Rain Dance ceremony was performed.	431.6.29-7.25	431
35	The Southern History (南史)	Imperial clan members were dispatched to perform rain prayers	暎弟晔：晔初至郡，属旱，躬自祈祷，果获甘润。郡雀林村旧多猛兽为害，晔在政六年，此暴遂息。卒于郡。	Ying's younger brother Ye: When Ye first arrived in the commandery, a drought occurred. He personally led prayers for rain, which indeed resulted in timely rainfall. The QueLin village in the commandery had long suffered from frequent attacks by fierce beasts. During Ye's six-year administration, this menace was eliminated. He passed away while serving in the commandery.	549-551	549-551
36	Wei Shu / Northern History (魏书/北史)	The emperor personally performed rain prayers	太延元年六月甲午诏曰：“羣公卿士，师尹牧守，或未尽导扬之美，致令隂阳失序，和气不平，去春小旱，东作不茂。忧勤克已，祈请灵祇，上下咸秩。岂朕精诚有感，何报应之速，云雨震洒，流泽沾渥。	In the sixth month of the first year of Taiyan, on the day of Jiamao, the imperial edict proclaimed: "The ministers, high officials, instructors, governors, and administrators may not have fully exemplified the virtue of guidance and promotion, leading to a disruption in the balance of yin and yang, and an imbalance in harmonious energy. Last spring, there was a minor drought, and the eastern agr…	435.7.19	435
37	Wei Shu / Northern History (魏书/北史)	The emperor personally performed rain prayers	太和元年五月乙酉，车驾祈雨于武州山。	On the yiyou day of the fifth month in the first year of the Taihe era, the imperial carriage journeyed to Wuzhou Mountain to pray for rain.	477.5.30	477
38	Wei Shu / Northern History (魏书/北史)	The emperor personally performed rain prayers	太和二年夏四月己丑，京师旱。甲辰，祈天灾于北苑，亲自礼焉。灭膳，避正殿。	In the summer, the fourth month, on the day Jichou, in the second year of the Taihe era, the capital suffered a drought. On the day Jiachen, prayers were offered at the Northern Park to avert the heavenly disaster, and the emperor personally presided over the ceremony. He reduced his meals and avoided the main hall.	478.6.13	478
39	Wei Shu / Northern History (魏书/北史)	The emperor personally performed rain prayers	太和三年五月丁巳，帝祈雨于北苑，闭阳门，是日㴻雨大洽。	On the day of Dingsi in the fifth month of the third year of the Taihe era, the emperor prayed for rain at the North Garden, closing the Yang Gate, and on that day, heavy rain poured down abundantly.	479.6.21	479
40	Wei Shu (魏书)	Officials were dispatched to perform rain prayers	太和四年二月，癸巳，诏曰：「朕承乾绪，君临海内，夙兴昧旦，如履薄冰。今东作方兴，庶类萌动，品物资生，膏雨不降，岁一不登，百姓饥乏，朕甚惧焉。其敕天下，祀山川群神及能兴云雨者，修饰祠堂，荐以牲璧。民有疾苦，所在存问。」	In the second month of the fourth year of the Taihe era, on the day Guisi, an imperial edict was proclaimed: "I, the Emperor, having inherited the imperial lineage and ruling over the realm, rise early and labor tirelessly, as if treading on thin ice. Now, as the spring ploughing season begins and all things stir to life, the resources for sustenance are produced, yet the nourishing rain fails to…	480.3.23	480
41	Wei Shu (魏书)	Officials were dispatched to perform rain prayers	太和五年四月甲寅诏曰：时雨不沾，春苗萎悴。诸有骸骨之处，皆敕埋藏，勿令露见。有神祇之所，悉可祷祈。	In the fourth month of the fifth year of the Taihe era, on the day Jiayin, an imperial edict was issued: "The timely rains have not come, and the spring seedlings have withered. Wherever there are remains of the deceased, they must be properly buried and not left exposed. At all sacred shrines, prayers should be offered."	481.6.7	481
42	Northern History (北史)	Imperial clan members personally performed rain prayers	太和二十年五月，南安王桢又以旱祈雨于羣神。（邺城）	In May of the twentieth year of the Taihe era, Prince Nan'an, Zhen, again prayed for rain to the multitude of gods due to the drought. (Yecheng)	496.5.28-496.6.26	496
43	Wei Shu (魏书)	The emperor personally performed rain prayers	七月戊寅，（北魏）帝以久旱，咸秩群神。	On the day Wuyin in the seventh month, the Emperor of Northern Wei, due to the prolonged drought, performed rituals to all the gods.	496	496
44	The Southern History (南史)	Officials were dispatched to perform rain prayers	天监四年，荆州大旱，憺使祠于天井，有巨蛇长二丈出绕祠坛，俄而注雨，岁大丰。	In the fourth year of the Tianjian era, a severe drought struck Jingzhou. Dan conducted a ritual at Tianjing, during which a massive serpent, twenty feet long, emerged and coiled around the altar. Shortly after, heavy rain poured down, resulting in an exceptionally abundant harvest that year.	505	505
45	The Southern History (南史)	The emperor personally performed rain prayers+Officials were dispatched to perform rain prayers	天监六年，先是旱甚，诏祈蒋帝神求雨，十旬不降。帝怒，命载荻欲焚蒋庙并神影。尔日开朗，欲起火，当神上忽有云如伞，倏忽骤雨如写，台中宫殿皆自振动。帝惧，驰诏追停，少时还静。自此帝畏信遂深。自践阼以来，未尝躬自到庙，于是备法驾将朝臣修谒。	In the sixth year of Tianjian's reign, a severe drought had persisted for some time. An edict was issued to pray to the Jiang Emperor deity for rain, but after a hundred days, no rain fell. The emperor, enraged, ordered bundles of reeds to be loaded with the intention of burning the Jiang Temple and the deity's image. On that day, just as the sky cleared and they were about to set the fire, a clo…	507	507
46	Wei Shu (魏书)	The emperor personally performed rain prayers	魏孝明帝熙平二年，配雩祀。	In the second year of the Xiping era during the reign of Emperor Xiaoming of Wei, it was designated for use in the rain-seeking ceremony.	517	517
47	Wei Shu / Southern History / Northern History (魏书/南史/北史)	Officials were dispatched to perform rain prayers	魏孝明帝神龟二年二月壬寅，诏曰：“农要之月，时泽弗应，嘉谷未纳，二麦枯悴。德之无感，叹惧兼怀。 可敕内外，依旧雩祈，率从祀典。察狱理冤，掩胔埋骼。冀瀛之境，往经寇暴，死 者既多，白骨横道，可遣专令收葬。赈穷恤寡，救疾存老，准访前式，务令周备。” 三月甲辰，澍雨大洽。	In the second year of the Shenggui era of Emperor Xiaoming of Wei, on the Renyin day of the second month, an edict was issued: "During this crucial agricultural season, timely rains have not come, the fine grains have not been harvested, and the wheat crops are withered and distressed. Our lack of virtue has failed to evoke a response, and we are filled with both lament and fear. Let it be ordere…	519.3.17-519.4.14	519
48	The Southern History (南史)	Officials were dispatched to perform rain prayers	正光三年六月己巳，以旱故，诏分遣有司驰祈岳渎及诸山川百神能兴云雨者。命理冤狱，止土功，减膳彻悬，禁止屠杀。	On the day of Jisi in the sixth month of the third year of Zhengguang, due to the drought, an edict was issued dispatching officials to swiftly pray to the sacred mountains, rivers, and all deities capable of bringing clouds and rain. Orders were given to review wrongful convictions, halt construction projects, reduce imperial meals and remove ceremonial decorations, and prohibit slaughter.	522.7.17	522
49	Northern History (北史)	The emperor personally performed rain prayers	南朝西梁宣帝大定三年夏四月甲申，以旱故，上亲祀雨师。	In the summer, the fourth month of the third year of the Dading era under Emperor Xuan of the Western Liang dynasty, on the day Jiashen, due to a drought, the emperor personally conducted a ritual to worship the Rain God.	557	557
50	Northern History (北史)	The emperor personally performed rain prayers	大定三年四月癸巳，上亲雩。	On the Guisi day of the fourth month in the third year of the Dading era, the emperor personally conducted the rain-making ceremony.	557	557
51	Book of Northern Qi / Northern History（北齐书/北史）	The emperor personally performed rain prayers	天保九年四月辛巳。是夏，大旱。帝以祈雨不应，毁西门豹祠，掘其冢。	On the Xinsi day of the fourth month in the ninth year of Tianbao. That summer, a severe drought occurred. The emperor, having received no response to his prayers for rain, ordered the destruction of the Ximen Bao Temple and the excavation of his tomb.	558.5.21	558
52	Chen Shu (陈书)	The emperor personally performed rain prayers	永定三年四月丙午。是时久不雨，丙午，舆驾幸钟山祠蒋帝庙，是日降雨，迄于月晦。	On the bingwu day in the fourth month of the third year of the Yongding era. At that time, there had been no rain for a long time. On the bingwu day, the emperor visited the Temple of Emperor Jiang at Zhongshan to offer sacrifices. Rain fell that day and continued until the end of the month.	559.4.23-559.5.21	559
53	Zhou Shu (周书)	The emperor personally performed rain prayers	周武帝保定三年夏四月癸卯，大雩。	In the third year of the Baoding era of Emperor Wu of Zhou, during the summer month of April on the day Guimao, a great rainmaking ceremony was held.	563.5.17	563
54	Zhou Shu (周书)	Officials were dispatched to perform rain prayers	达奚武：天和三年，转太傅。武之在同州也，时属天旱，高祖敕武祀华岳。岳庙旧在山下，常所祷祈。武谓僚属曰：“吾备位三公，不能燮理阴阳，遂使盛农之月，久绝甘雨，天子劳心，百姓惶惧。吾忝寄既重，忧责实深，不可同于众人，在常祀之所，必须登峯展诚。”	Daxi Wu: In the third year of the Tianhe era, he was transferred to the position of Grand Tutor. While Wu was stationed in Tongzhou, a drought occurred. Emperor Gaozu ordered Wu to offer sacrifices at Mount Hua. The temple of the mountain deity was traditionally located at the foot of the mountain, where prayers were usually conducted. Wu said to his subordinates, "I hold the position of one of t…	563	563
55	Zhou Shu (周书)	The emperor personally performed rain prayers	周武帝天和元年夏四月辛亥，雩。	In the summer of the fourth month, on the Xinhai day, a rainmaking ceremony was held during the Tianhe era of Emperor Wu of Zhou.	566.5.9	566
56	Zhou Shu / Northern History (周书/北史)	The emperor personally performed rain prayers	大象二年四月壬午，幸中〔仲〕山祈雨。	On the renwu day of the fourth month in the second year of the Daxiang era, the emperor visited Zhongshan to pray for rain.	580.5.26	580
57	Chen Shu (陈书)	The emperor personally performed rain prayers	陈宣帝太建十二年夏四月己卯，大雩。壬午，雨。	On the summer month of April, the year of Jimao during the reign of Emperor Xuan of Chen in the twelfth year of the Taijian era, a grand rainmaking ceremony was held. On the day of Renwu, it rained.	580	580
58	History of the Sui Dynasty (隋书)	The emperor personally performed rain prayers	隋文帝开皇三年夏四月甲申，旱，上亲祈雨于国城之西南。	In the summer, the fourth month, during the Jiashēn day of the reign of Emperor Wen of Sui in the third year of the Kaihuang era, a drought occurred. The emperor personally prayed for rain in the southwestern part of the capital city.	583.5.13	583
59	History of the Sui Dynasty (隋书)	The emperor personally performed rain prayers	隋文帝开皇三年夏四月癸巳，上亲雩。	On the summer month of April, Guisi day, the third year of the Kaihuang era of Emperor Wen of Sui, the emperor personally conducted the rain sacrifice.	583	583
60	History of the Sui Dynasty (隋书)	The emperor personally performed rain prayers	开皇十五年春正月庚午，上以岁旱，祠太山，以谢愆咎。大赦天下。	In the spring of the fifteenth year of the Kaihuang era, on the day Gengwu in the first month, the Emperor, due to the year's drought, offered sacrifices at Mount Tai to atone for faults and errors. A general amnesty was proclaimed throughout the land.	595.2.25	592
61	The Old Book of Tang / The New Book of Tang (旧唐书/新唐书)	The emperor personally performed rain prayers	大业十三年，高祖乃命太宗与刘文静及门下客长孙顺德、刘弘基各募兵，旬日间众且一万，密遣使召世子建成及元吉于河东。威、君雅见兵大集，恐高祖为变，相与疑惧，请高祖祈雨于晋祠，将为不利。/副留守虎贲郎将王威、虎牙郎将高君雅见兵大集，疑有变，谋因祷雨晋祠以图高祖。高祖觉之，乃阴为备。	In the thirteenth year of the Daye era, Emperor Gaozu ordered Emperor Taizong, along with Liu Wenjing and his retainers Zhangsun Shunde and Liu Hongji, to each recruit soldiers. Within ten days, nearly ten thousand men were gathered, and secret messengers were dispatched to summon the heir apparent Jiancheng and Yuanji from Hedong. Wang Wei and Gao Junya, seeing the large assembly of troops, grew…	617.2.11-618.1.31	617
62	The Old Book of Tang (旧唐书)	Officials were dispatched to perform rain prayers	贞观三年六月戊寅，以旱，亲录囚徒。遣长孙无忌、房玄龄等祈雨于名山大川，中书舍人杜正伦等往关内诸州慰抚。又令文武官各上封事，极言得失。	On the wuyin day in the sixth month of the third year of the Zhenguan era, due to drought, the emperor personally reviewed the cases of prisoners. He dispatched Zhangsun Wuji, Fang Xuanling, and others to pray for rain at the famous mountains and great rivers, while Zhongshu Sheren Du Zhenglun and others were sent to the various prefectures within the Pass to offer comfort and安抚. Additionally, ci…	629.7.4	629
63	The Old Book of Tang (旧唐书)	The emperor personally performed rain prayers	永徽三年春正月癸亥，以去秋至于是月不雨，上避正殿，降天下死罪及流罪递减一等，徒以下咸宥之。丙子，亲祠太庙。	In the spring of the third year of Yonghui, on the Guihai day of the first month, due to the lack of rain from the previous autumn until that month, the emperor refrained from using the main hall of the palace. He ordered that the sentences for capital crimes and exile be reduced by one degree nationwide, and all sentences of penal servitude or lesser punishments were pardoned. On the Bingzi day,…	652	652
64	The Old Book of Tang / The New Book of Tang (旧唐书/新唐书)	The emperor personally performed rain prayers	总章三年二月戊申，以旱，亲录囚徒，祈祷名山大川。	In the third year of the Zongzhang era, on the day Wushen in the second month, due to drought, the emperor personally reviewed the cases of prisoners and prayed to the famous mountains and great rivers.	670.3.1	670
65	New Book of Tang (新唐书)	Officials were dispatched to perform rain prayers	桓彦范：明年春，大旱，帝遣三思、攸暨祷乾陵而雨，帝悦。	Huan Yanfan: In the spring of the following year, a severe drought occurred. The emperor dispatched Wu Sansi and Wu Youji to pray for rain at the Qianling Mausoleum, and rain followed. The emperor was pleased.	707	707
66	New Book of Tang (新唐书)	Officials were dispatched to perform rain prayers	圣历二年，则天不豫，令朝隐往少室山祈祷。	In the second year of the Shengli era, Empress Wu Zetian fell ill and ordered Chao Yin to travel to Mount Shaoshi to offer prayers.	698	698
67	New Book of Tang (新唐书)	Officials were dispatched to perform rain prayers	开元二年正月壬午，以关内旱，求直谏，停不急之务，宽系囚，祠名山大川，葬暴骸。二月壬辰，避正殿，减膳，彻乐。突厥寇北庭，都护郭虔瓘败之。己酉，虑囚。	On the renwu day of the first month in the second year of the Kaiyuan era, due to a drought in Guannei, the emperor called for forthright remonstrance, suspended non-urgent matters, showed leniency to prisoners, offered sacrifices at famous mountains and great rivers, and buried exposed corpses. On the renchen day of the second month, the emperor avoided the main hall, reduced his meals, and ceas…	714.2.12	714
68	New Book of Tang (新唐书)	Officials were dispatched to perform rain prayers	开元四年二月丁卯，至自温汤。以关中旱，遣使祈雨于骊山，应时澍雨。	On the dingmao day of the second month in the fourth year of the Kaiyuan era, the emperor returned from the Wenquan hot springs. Due to the drought in the Guanzhong region, he dispatched an envoy to Mount Li to pray for rain, which promptly brought a timely downpour.	716.3.18	716
69	New Book of Tang (新唐书)	The emperor personally performed rain prayers	开元十二年七月，河东、河北旱，帝亲祷雨宫中，设坛席，暴立三日。	In July of the twelfth year of the Kaiyuan era, a drought struck Hedong and Hebei. The emperor personally prayed for rain in the palace, setting up an altar and mats, and stood exposed to the sun for three days.	724.7-724.9	724
70	The Old Book of Tang / The New Book of Tang (旧唐书/新唐书)	The emperor personally performed rain prayers	唐肃宗乾元二年四月癸亥，以久旱徙市，雩祈雨。	On the Guihai day of the fourth month in the second year of the Qianyuan era during the reign of Emperor Suzong of Tang, due to a prolonged drought, the market was relocated, and a rain-making ceremony was performed to pray for rain.	759.5.28	759
71	The Old Book of Tang (旧唐书)	Officials were dispatched to perform rain prayers	乾元二年正月，肃宗亲祀。伏自累年已来，水旱愆候，恐是有司祷请，诚敬稍亏。今属孟春，合修祀典，望至明年正月祭日，差宰臣一人祷请。向后四时祭，并请差仆射、少师、少保、尚书、太常卿等官，所冀稍重其事，以申严敬。臣等十一月二十五日已于延英面奏，伏奉圣旨令检仪注进来者。今欲祭时，伏望令有司崇饰旧坛，务于严洁。」敕旨依奏。	In the second year of the Qianyuan era, during the first month, Emperor Suzong personally presided over the sacrifices. For several consecutive years, there had been irregularities in rainfall and droughts, likely due to insufficient sincerity and reverence in the officials' prayers and supplications. Now, at the beginning of spring, it is appropriate to observe the sacrificial rites. It is reque…	759.2.3-759.3.3	759
72	The Old Book of Tang / The New Book of Tang (旧唐书/新唐书)	Officials were dispatched to perform rain prayers	永泰二年，春夏累月亢旱，诏大臣裴冕等十馀人，分祭川渎以祈雨。礼仪使右常侍于休烈请依旧祠风伯、雨师于国门旧坛，复为中祠，从之。	In the second year of the Yongtai era, a prolonged drought persisted through the spring and summer. Emperor Daizong of Tang ordered over ten officials, including Minister Pei Mian, to conduct separate rituals at rivers and waterways to pray for rain. Yu Xielie, the Director of Rituals and Right Regular Attendant, petitioned to revive the traditional practice of worshiping the Wind Master and Rain…	766.2.14-12.6	766
73	The Old Book of Tang (旧唐书)	The emperor personally performed rain prayers+Officials were dispatched to perform rain prayers	大历七年四月：朕涉道未弘……如闻天下诸州，或愆时雨，首种不入，宿麦未登。哀我矜人，何时不恐？皆由朕过，益用惧焉。惕然忧嗟，深自咎责。所以减膳彻乐，别居斋宫，祷于神明，冀获嘉应。仲夏之月，静事无为，以助晏阴，以弘长养。断薄决小，已过于麦秋；继长增高，宜顺乎天意。可大赦天下，见禁囚徒，罪无轻重，一切释放。	April, the seventh year of the Dali era: We have yet to fully embody the Way... It has come to Our attention that across the various prefectures of the realm, some have suffered from untimely rains, preventing the sowing of the first crops and delaying the harvest of the winter wheat. How can We not feel constant dread for Our suffering people? All this stems from Our own failings, intensifying O…	772.5.7-772.6.5	772
74	The Old Book of Tang / The New Book of Tang (旧唐书/新唐书)	Officials were dispatched to perform rain prayers	大历十二年春正月癸酉夜，月掩心前大星，又入南斗魁。京师旱，分命祈祷。	On the night of Guiyou in the first month of spring in the twelfth year of the Dali era, the moon obscured the large star in front of the Heart constellation and entered the Southern Dipper. The capital experienced a drought, leading to the dispatch of officials to conduct prayers.	777.3.4	777
75	The Old Book of Tang / The New Book of Tang (旧唐书/新唐书)	The emperor personally performed rain prayers	大历十二年六月癸巳，时小旱，上斋居祈祷，圣体不康，是日不视朝。八月乙巳，以久雨宥常参百僚，不许御史点班。	On the 10th day of the sixth month in the twelfth year of the Dali era, a minor drought occurred. The Emperor observed a fast and offered prayers, as his sacred health was unwell, and he did not hold court that day. On the 23rd day of the eighth month, due to prolonged rain, he granted amnesty to the regular attending officials, instructing the censors not to conduct roll call.	777.7.22	777
76	The Old Book of Tang / The New Book of Tang (旧唐书/新唐书)	Officials were dispatched to perform rain prayers	贞元元年五月癸卯，分命朝臣祷群神以祈雨。	On the guimao day of the fifth month in the first year of the Zhenyuan era, court officials were separately dispatched to pray to various deities for rain.	785.6.20	785
77	The Old Book of Tang / The New Book of Tang (旧唐书/新唐书)	The emperor personally performed rain prayers	贞元六年冬十月己亥，文武百僚京城道俗抗表请徽号，上曰：「朕以春夏亢旱，粟麦不登，朕精诚祈祷，获降甘雨，既致丰穰，告谢郊庙。朕倘因礼祀而受徽号，是有为为之。勿烦固请也。」	On the winter tenth month jihai day of the sixth year of Zhenyuan, all civil and military officials, as well as Daoist and Buddhist clergy in the capital, submitted a joint petition requesting the bestowal of an honorific title. The Emperor responded: "Due to the severe drought during spring and summer, the millet and wheat harvests failed. Through my sincere prayers, sweet rain finally descended…	790.11.17	790
78	New Book of Tang (新唐书)	The emperor personally performed rain prayers	贞元十三年四月壬戌，上幸兴庆宫龙堂祈雨。/贞元十三年四月辛酉，以旱虑囚。壬戌，雩于兴庆宫。	On the renxu day in the fourth month of the thirteenth year of the Zhenyuan era, the Emperor visited the Dragon Hall of Xingqing Palace to pray for rain. / On the xinyou day in the fourth month of the thirteenth year of the Zhenyuan era, prisoners were reviewed due to the drought. On the renxu day, a rainmaking ceremony was held at Xingqing Palace.	797.5.7	797
79	New Book of Tang (新唐书)	Officials were dispatched to perform rain prayers	贞元十五年四月丁丑，以久旱，令阴阳人法术祈雨。	On the Dingchou day of the fourth month in the fifteenth year of the Zhenyuan era, due to a prolonged drought, practitioners of yin-yang arts were ordered to perform rituals to pray for rain.	799.5.12	799
80	The Old Book of Tang / The New Book of Tang (旧唐书/新唐书)	Officials were dispatched to perform rain prayers	贞元十九年五月甲辰，自正月至是未雨，分命祈祷山川。	On the fifth day of the fifth month in the nineteenth year of Zhenyuan's reign, no rain had fallen since the first month. Orders were issued to pray to the mountains and rivers.	803.7.17	803
81	The Old Book of Tang / The New Book of Tang (旧唐书/新唐书)	Officials were dispatched to perform rain prayers	开成四年六月戊辰，以久旱，分命祠祷，每忧动于色。宰相等奏曰：「水旱时数使然，乞不过劳圣虑。」上改容言曰：「朕为人主，无德及天下，致兹灾旱，又谪见于天。若三日不雨，当退归南内，更选贤明以主天下。」宰臣呜咽流涕，各请策免。是夜，大雨沾霈。/是岁，夏大旱，祷祈无应，文宗忧形于色。	On the fourth day of the sixth month in the fourth year of the Kaicheng era, due to a prolonged drought, the emperor ordered separate prayers and sacrifices at various temples, his concern evident in his expression. The chancellor and other officials addressed him, saying, "Floods and droughts are governed by the cycles of time. We beg Your Majesty not to overly distress yourself." The emperor, w…	839.8.1	839
82	New Book of Tang (新唐书)	The emperor personally performed rain prayers+Officials were dispatched to perform rain prayers	咸通十年六月丁亥。旱暵是虞，虫螟为害，蛮蜒未宾于遐裔，寇盗复蠹于中原。尚驾戎车，益调兵食，俾黎元之重困，每宵旰而忘安。今盛夏骄阳，时雨久旷，忧勤兆庶，旦夕焦劳。内修香火以虔祈，外罄牲玉以精祷。	On the seventh day of the sixth month in the tenth year of Xiantong reign, we faced droughts and pest infestations. The southern tribes remained unsubdued in distant regions, while bandits and rebels continued to plague the Central Plains. Military campaigns persisted, requiring increased mobilization of troops and provisions, further burdening the common people. Day and night, we labored without…	869.7.13	869
83	The Old Five Dynasties History (旧五代史)	Officials were dispatched to perform rain prayers	开平二年二月。自去冬少雪，春深农事方兴，久无时雨。兼虑有灾疾，帝深轸下民，二月，命庶官遍祀于群望，掩瘗暴露，令近镇案古法以禳祈，旬日乃雨。	In the second month of the second year of the Kaiping era. Since the previous winter had seen little snow and spring had deepened with farming activities just beginning, there had been no timely rain for an extended period. Additionally, concerns arose about potential disasters and epidemics. Deeply troubled for the welfare of the people, the emperor issued a decree in the second month, ordering …	908.3.5-908.4.3	908
84	The Old Five Dynasties History (旧五代史)	Officials were dispatched to perform rain prayers	乾化元年三月辛卯，以久旱，令宰臣分祷灵迹。翼日，大澍雨。丙申，幸甘水亭，召宰臣、翰林学士、尚书侍郎孔续已下八人扈从，宴乐甚欢。	On the third day of the third month in the first year of Qianhua, due to a prolonged drought, the emperor ordered his chief ministers to pray at various sacred sites. The following day, heavy rain fell. On the eighth day, the emperor visited the Gan Water Pavilion, summoning eight officials—including the chief ministers, academicians of the Hanlin Academy, and the Minister of Personnel Kong Xuyi—…	911.5	911
85	The Old Five Dynasties History (旧五代史)	Officials were dispatched to perform rain prayers	乾化元年十一月壬辰，诘旦离孟州，晚至都。宣宰臣各赴望祠祷雨。故事，皆以两省无功职事为之，帝忧民重农，尤以足食足兵为念，爰自御极，每愆阳积阴，多命丞相躬其事。辛丑，大雨雪，宰臣及文武师长各奉表贺焉。	On the Renchen day of the eleventh month in the first year of Qianhua, at dawn, the emperor departed from Mengzhou and arrived at the capital by evening. He ordered the chief ministers to proceed to various temples to pray for rain. According to precedent, such duties were typically assigned to officials from the two departments without substantive responsibilities. However, deeply concerned for …	911.12.5	911
86	The Old Five Dynasties History (旧五代史)	Officials were dispatched to perform rain prayers	乾华二年三月丙午，次济源县。诏曰：「淑律将迁，亢阳颇甚，宜令魏州差官祈祷龙潭。」	On the bingwu day in the third month of the second year of the Qianhua era, the procession arrived at Jiyuan County. An imperial edict was issued: "As the season is about to change and the intense heat is particularly severe, it is appropriate to order Weizhou to dispatch officials to pray for rain at the Dragon Pool."	912.3.28	912
87	The Old Five Dynasties History (旧五代史)	Officials were dispatched to perform rain prayers	乾化二年三月戊申诏曰：「雨泽愆期，祈祷未应，宜令宰臣各于魏州灵祠精加祈祷。」	On the wushen day of the third month in the second year of the Qianhua era, an edict was issued: "As the rains have been delayed and prayers have yet to be answered, it is appropriate to order the chief ministers to conduct earnest prayers at the sacred temples of Weizhou."	912.4.19	912
88	The Old Five Dynasties History (旧五代史)	Officials were dispatched to perform rain prayers	乾化二年五月辛卯，诏曰：「亢阳滋甚，农事已伤，宜令宰臣于兢赴中岳，杜晓赴西岳，精切祈祷。其近京灵庙，宜委河南尹，五帝坛、风师雨师、九宫贵神，委中书各差官祈之。」	On the day Xinmao of the fifth month in the second year of Qianhua era, an imperial edict stated: "The excessive drought has severely damaged agricultural activities. It is appropriate to order the Chief Minister Yu Jing to proceed to Mount Song and Du Xiao to Mount Hua, conducting sincere and earnest prayers. For the spiritual temples near the capital, the Governor of Henan should be entrusted t…	912.6.1	912
89	The Old Five Dynasties History (旧五代史)	Officials were dispatched to perform rain prayers	同光三年夏四月癸酉，诏翰林学士承旨卢质覆试新及第进士。《五代会要》：时以新及第进士符蒙正等尚干浮议，故命卢质覆试。租庸使奏：「时雨久愆，请下诸道州府，依法祈祷。」从之。	In the summer, the fourth month of the third year of Tongguang, on the day Guiyou, an edict was issued appointing Lu Zhi, the Hanlin Academician Recipient of Edicts, to re-examine the newly passed jinshi degree holders. According to the *Wudai Huiyao*, at that time, there were still rumors circulating about the newly passed jinshi such as Fu Mengzheng, hence Lu Zhi was ordered to conduct the re-e…	925.5.6	925
90	The Old Five Dynasties History (旧五代史)	Officials were dispatched to perform rain prayers	同光三年四月辛巳，以旱甚，诏河南府徙市，造五方龙，集巫祷祭。	On the Xinsi day of the fourth month in the third year of the Tongguang era, due to severe drought, an edict was issued to relocate markets in Henan Prefecture. Five-directional dragons were crafted, and shamans were gathered to perform prayers and sacrifices.	925.5.14	925
91	The Old Five Dynasties History (旧五代史)	The emperor personally performed rain prayers	同光三年五月戊申，幸龙门广化寺祈雨。	On the wushen day of the fifth month in the third year of the Tongguang era, the emperor visited Guanghua Temple at Longmen to pray for rain.	925.6.10	925
92	The Old Five Dynasties History (旧五代史)	The emperor personally performed rain prayers	同光三年五月己未，诏天下见禁罪人，如无大过，速令疏放。幸太清宫祷雨。	On the day of Jiwei in the fifth month of the third year of the Tongguang era, an edict was issued ordering the swift release of all prisoners held across the realm, provided they had not committed major offenses. The emperor then visited the Taiqing Palace to pray for rain.	925.6.21	925
93	The Old Five Dynasties History (旧五代史)	The emperor personally performed rain prayers	长兴二年四月乙巳，帝幸龙门佛寺祈雨。	On the day of Yisi in the fourth month of the second year of the Changxing era, the emperor visited the Longmen Buddhist temple to pray for rain.	931.5.7	931
94	The Old Five Dynasties History (旧五代史)	The emperor personally performed rain prayers	长兴二年七月甲辰，幸龙门佛寺祷雨。	On the day of Jiachen in the seventh month of the second year of the Changxing era, the emperor visited the Longmen Buddhist Temple to pray for rain.	931.8.16-931.9.14	931
95	The Old Five Dynasties History (旧五代史)	Officials were dispatched to perform rain prayers	清泰三年六月庚午，诏曰：「时雨稍愆，颇伤农稼，分命朝臣祈祷。」	On the afternoon of the sixth month in the third year of Qingtai, an edict was issued: "The timely rains have been somewhat scarce, causing considerable harm to the crops; officials from the court are to be dispatched to conduct prayers."	936.7.4	936
96	The Old Five Dynasties History (旧五代史)	Officials were dispatched to perform rain prayers	天福元年十二月辛卯。时自秋不雨，经冬无雪，命群官遍加祈祷。	On the xinmao day of the twelfth month in the first year of Tianfu. As there had been no rain since autumn and no snow throughout the winter, officials were ordered to conduct prayers far and wide.	937.1.21	937
97	The Old Five Dynasties History (旧五代史)	Officials were dispatched to perform rain prayers	帝在并州未著人望，及保厘浚郊，大有宽裕之称。从幸邺都，是岁遇旱，高祖少帝遣祈雨于白龙潭，有白龙见于潭心，是夜澍雨尺馀，人皆异之，至是果登大位焉。	The emperor had not yet gained widespread acclaim while in Bingzhou, but upon assuming governance in the suburbs of Jun, he earned a reputation for great leniency and competence. While accompanying the court to Yedu, a drought occurred that year. Emperor Gaozu and the young emperor dispatched him to pray for rain at Bailong Pond, where a white dragon appeared at the center of the pond. That night…	936-942	943
98	The Old Five Dynasties History (旧五代史)	Officials were dispatched to perform rain prayers	天福七年三月壬戌，分命朝臣诸寺观祷雨。	On the Renxu day in the third month of the seventh year of Tianfu, court officials were separately dispatched to various temples and Taoist monasteries to pray for rain.	942.3.27	942
99	The Old Five Dynasties History (旧五代史)	Officials were dispatched to perform rain prayers	天福七年三月丁丑，宰臣于寺观祷雨。	On the Dingchou day of the third month in the seventh year of Tianfu, the chancellor prayed for rain at the temple.	942.4.11	942
100	The Old Five Dynasties History (旧五代史)	Officials were dispatched to perform rain prayers	天福七年九月丁丑朔，百官素服临于天清殿。己卯，分命朝臣诣寺观祷雨。	On the first day of the ninth month in the seventh year of Tianfu, officials dressed in plain mourning garments gathered at Tianqing Hall. On the third day, court officials were separately dispatched to temples and Taoist monasteries to pray for rain.	942.10.13-942.11.10	942
101	The Old Five Dynasties History (旧五代史)	Officials were dispatched to perform rain prayers	天福八年五月癸巳，命宰臣等分诣寺观祷雨。	On the day Guisi in the fifth month of the eighth year of Tianfu, the emperor ordered his ministers to visit various temples and Taoist shrines to pray for rain.	943.6.21	943
102	The Old Five Dynasties History (旧五代史)	The emperor personally performed rain prayers	天福八年五月乙巳，幸相国寺祈雨。	On the day Yisi in the fifth month of the eighth year of Tianfu's reign, the emperor visited Xiangguo Temple to pray for rain.	943.7.3	943
103	The Old Five Dynasties History (旧五代史)	Officials were dispatched to perform rain prayers	天福八年六月丙辰，遣供奉官卫延韬诣嵩山投龙祈雨。	On the day of Bingchen in the sixth month of the eighth year of the Tianfu era, the court dispatched the Palace Attendant Wei Yantao to Mount Song to perform the ritual of casting a dragon plaque into the mountains, praying for rain.	943.7.14	943
104	The Old Five Dynasties History (旧五代史)	Officials were dispatched to perform rain prayers	开运二年六月壬午，大理卿张仁愿卒，赠秘书监。遣刑部尚书窦贞固等分诣寺观祷雨。是月，两京及州郡十五并奏旱。	On the Renwu day of the sixth month in the second year of the Kaiyun era, Zhang Renyuan, the Minister of Dali, passed away and was posthumously honored as the Director of the Secretariat. Xingbu Shangshu Dou Zhengu and others were dispatched to various temples and Taoist shrines to pray for rain. That same month, fifteen reports of drought were submitted from the two capitals and various prefectu…	945.7.29	945
105	The Old Five Dynasties History (旧五代史)	Officials were dispatched to perform rain prayers	开运三年四月乙亥，宰臣诣寺观祷雨。	On the Yihai day of the fourth month in the third year of Kaiyun, the chancellor visited temples and Taoist shrines to pray for rain.	946.5.18	946
106	The Old Five Dynasties History (旧五代史)	The emperor personally performed rain prayers	开运三年四月戊寅，幸相国寺祷雨。	On the fourth day of the fourth month in the third year of the Kaiyun era, the emperor visited Xiangguo Temple to pray for rain.	946.5.21	946
107	The Old Five Dynasties History (旧五代史)	The emperor personally performed rain prayers	乾祐元年四月丁亥，幸道宫、佛寺祷雨。是月，河决原武县，河北诸州旱，徐州饿死民九百三十有七。	In the fourth month of the first year of Qianyou, on the day Dinghai, the emperor visited Taoist and Buddhist temples to pray for rain. That same month, the Yellow River breached its banks at Yuanwu County. The northern provinces suffered from drought, and in Xuzhou, nine hundred and thirty-seven people died of starvation.	948.5.19	948
108	The Old Five Dynasties History (旧五代史)	The emperor personally performed rain prayers	乾祐元年七月丙辰，以久旱，幸道宫、佛寺祷雨，是日大澍。	On the bingchen day of the seventh month in the first year of Qianyou, due to a prolonged drought, the emperor visited Taoist temples and Buddhist monasteries to pray for rain. That very day, heavy rain poured down.	948.8.16	948
109	The Old Five Dynasties History (旧五代史)	The emperor personally performed rain prayers	乾祐二年四月辛丑，幸道宫祷雨。	On the fourth day of the fourth month in the second year of Qianyou's reign, the emperor visited the Daoist temple to pray for rain.	949.5.28	949
110	The Old Five Dynasties History (旧五代史)	Officials were dispatched to perform rain prayers	广顺二年四月戊子，以京师旱，分命群臣祷雨。	On the Wuzi day in the fourth month of the second year of the Guangshun era, due to a drought in the capital, officials were separately dispatched to pray for rain.	952.4.29	952
111	History of Song Dynasty (宋史)	Officials were dispatched to perform rain prayers	建隆元年八月甲戌，命宰相祷雨。	On the day of Jiashen in the eighth month of the first year of the Jianlong era, the emperor ordered the chancellor to pray for rain.	960.8.31	960
112	History of Song Dynasty (宋史)	The emperor personally performed rain prayers	建隆二年六月壬子，祈雨。	On the renzi day of the sixth month in the second year of the Jianlong era, prayers for rain were offered.	961.8.4	961
113	History of Song Dynasty (宋史)	The emperor personally performed rain prayers	建隆三年三月癸亥，祷雨。己巳，大雨。	On the guihai day in the third month of the third year of the Jianlong era, prayers for rain were offered. On the jisi day, heavy rain fell.	962.4.12	962
114	History of Song Dynasty (宋史)	The emperor personally performed rain prayers	建隆三年五月甲子，幸相国寺祷雨。癸未，命使检诸州旱。	On the day of Jiǎzǐ in the fifth month of the third year of the Jiànlóng era, the emperor visited the Xiangguo Temple to pray for rain. On the day of Guǐwèi, he ordered officials to inspect the drought conditions in various prefectures.	962.6.12	962
115	History of Song Dynasty (宋史)	The emperor personally performed rain prayers	建隆三年五月甲申，诏均户役，敢蔽占者有罪。复幸相国寺祷雨。	On the day of Jiashen in the fifth month of the third year of the Jianlong era, an edict was issued to equalize household corvée duties, with penalties for those who dared to conceal or withhold labor. The emperor again visited the Xiangguo Temple to pray for rain.	962.7.2	962
116	History of Song Dynasty (宋史)	The emperor personally performed rain prayers	乾德元年夏四月，旱。甲申，遍祷京城祠庙，夕雨。	In the summer, during the fourth month of the first year of Qiande's reign, a drought occurred. On the day Jiashen, prayers were offered at all the temples and shrines across the capital, and by evening, rain fell.	963.4.28	963
117	History of Song Dynasty (宋史)	Officials were dispatched to perform rain prayers	乾德元年夏四月乙酉，遣使祭南岳。	In the summer, the fourth month, on the day Yiyou, of the first year of the Qiande era, an envoy was dispatched to offer sacrifices at the Southern Mountain.	963.4.29	963
118	History of Song Dynasty (宋史)	The emperor personally performed rain prayers	乾德元年五月壬子朔，祷雨京城。	On the first day of the fifth month in the first year of the Qiande era, prayers for rain were held in the capital.	963.5.26	963
119	History of Song Dynasty (宋史)	Officials were dispatched to perform rain prayers	乾德元年五月甲寅，遣使祷雨岳渎。乙丑，广大内。	On the jia-yin day of the fifth month in the first year of the Qiande era, envoys were dispatched to pray for rain at the sacred mountains and rivers. On the yi-chou day, the imperial palace was expanded.	963.5.28	963
120	History of Song Dynasty (宋史)	Officials were dispatched to perform rain prayers	乾德元年秋七月丁丑，分命近臣祷雨。京师雨。	On the Dingchou day of the seventh lunar month in the first year of the Qiande era, court officials were dispatched to offer prayers for rain. Rainfall occurred in the capital.	963.8.19	963
121	History of Song Dynasty (宋史)	Officials were dispatched to perform rain prayers	乾德二年三月丁酉，遣使祈雨于五岳。	On the day of Dingyou in the third month of the second year of Qiande, envoys were dispatched to pray for rain at the Five Sacred Mountains.	964.5.5	964
122	Liao History (辽史)	The emperor personally performed rain prayers	应历十六年五月甲申，以岁旱，泛舟于池祷雨；不雨，舍舟立水中而祷，俄顷乃雨。	On the jiashen day of the fifth month in the sixteenth year of the Yingli era, due to a severe drought, the emperor embarked on a boat on the pond to pray for rain. When no rain came, he abandoned the boat and stood in the water to continue his prayers. Shortly after, rain began to fall.	966.6.11	966
123	Liao History (辽史)	The emperor personally performed rain prayers	应历十七年夏四月丙子，射柳祈雨，复以水沃群臣。	On the bingzi day in the fourth month of the seventeenth year of the Yingli era during summer, willows were shot to pray for rain, and water was poured over the ministers again.	967.5.29	967
124	History of Song Dynasty (宋史)	The emperor personally performed rain prayers	宋太祖乾德五年，度支员外郎侯陟表中正有材干，入为殿中侍御史。两川平，选知兴元府，判西京留台，俄通判河南府留守司事。太祖雩祀西洛，以祗事之勤，转仓部员外郎。	In the fifth year of the Qiande era during the reign of Emperor Taizu of Song, Hou Zhi, a vice director of the Ministry of Revenue, submitted a memorial praising Zhongzheng for his talent and capability, leading to his appointment as a palace censor. After the pacification of the Two Shu regions, he was selected to administer Xingyuan Prefecture and later served as a judge in the Western Capital'…	967	967
125	Liao History (辽史)	The emperor personally performed rain prayers	保宁元年五月丙申朔，射柳祈雨。有司请以帝生日为天清节，从之。	On the first day of the fifth month in the first year of Baoning era, during the reign of Emperor Jingzong of Liao, willow-shooting ceremonies were held to pray for rain. The officials requested that the emperor's birthday be designated as Tianqing Festival, and the proposal was approved.	969.6.7	969
126	History of Song Dynasty (宋史)	The emperor personally performed rain prayers	开宝三年四月丁亥，幸寺观祷雨。	On the fourth month, Dinghai day of the third year of the Kaibao era, the emperor visited temples to pray for rain.	970.5.24	970
127	History of Song Dynasty (宋史)	The emperor personally performed rain prayers	宋太祖开宝六年，转侍卫步军都虞候、领洮州观察使。征江南，领步军战棹都指挥使。时吴兵三万屯皖口，遇会诸路兵破之，擒其将朱令贇、王晖等，获戎器数万，金陵以平，录功加领大同军节度。车驾雩祀西洛，命率禁卫以从。	In the sixth year of the Kaibao era under Emperor Taizu of Song, he was transferred to the post of Chief Military Inspector of the Infantry and concurrently appointed as Military Commissioner of Taozhou. During the campaign against the Southern Tang, he was appointed Commander of the Naval Infantry Forces. At that time, thirty thousand Wu troops were stationed at Wankou; he coordinated with vario…	973	973
128	History of Song Dynasty (宋史)	Officials were dispatched to perform rain prayers	开宝七年二月癸卯，命近臣祈雨。	On the Guimao day of the second month in the seventh year of the Kaibao era, court officials were ordered to pray for rain.	974.3.20	974
129	History of Song Dynasty (宋史)	Officials were dispatched to perform rain prayers	开宝八年三月己丑，命祈雨。	On the day Jichou in the third month of the eighth year of the Kaibao era, an order was issued to pray for rain.	975.4.30	975
130	Liao History (辽史)	The emperor personally performed rain prayers	保宁七年夏四月辛亥，射柳祈雨。如频跸淀清暑。	In the summer of the seventh year of the Baoning era, on the Xinhai day of the fourth month, willow shoots were shot to pray for rain. The emperor then proceeded to the Pinabi Lake for summer retreat.	975.5.22	975
131	History of Song Dynasty (宋史)	The emperor personally performed rain prayers	宋太祖开宝九年四月：太祖数诏俶与其子惟浚宴射苑中，惟诸王预坐。每宣谕俶，俶拜谢，多令内侍掖起，俶感泣。又尝一日召宴，独太宗、秦王侍坐，酒酣，太祖令俶与太宗、秦王叙昆仲之礼，俶伏地叩头，涕泣固让，乃止。会将以四月幸西京，亲雩祀，俶恳请扈从，不许，留惟浚侍祠，令俶归国。	In the fourth month of the ninth year of the Kaibao era, Emperor Taizu repeatedly summoned Qian Chu and his son Qian Weijun to banquets and archery in the palace gardens, with all the princes in attendance. Whenever the emperor issued an edict to Qian Chu, Qian Chu would bow in gratitude, and the emperor often ordered eunuchs to assist him in rising, which moved Qian Chu to tears. On one occasion…	976.5.2-976.5.31	976
132	History of Song Dynasty (宋史)	Officials were dispatched to perform rain prayers	太平兴国三年正月辛亥，命群臣祷雨。癸丑，京畿雨足。	On the day Xinhai in the first month of the third year of the Taiping Xingguo era, officials were ordered to pray for rain. On the day Guichou, the capital region received sufficient rainfall.	978.3.7	978
133	History of Song Dynasty (宋史)	Officials were dispatched to perform rain prayers	太平兴国三年四月乙卯朔，命群臣祷雨。	On the first day of the fourth month in the third year of the Taiping Xingguo era, the court officials were ordered to pray for rain.	978.5.10	978
134	Liao History (辽史)	The emperor personally performed rain prayers	乾亨二年夏四月庚辰，祈雨。	In the summer, the fourth month, on the Gengchen day of the second year of the Qianheng era, a prayer for rain was offered.	980.5.24	980
135	History of Song Dynasty (宋史)	Officials were dispatched to perform rain prayers	太平兴国六年二月己卯，命宰臣祷雨。	On the day Jimao in the second month of the sixth year of the Taiping Xingguo era, the prime minister was ordered to pray for rain.	981.3.19	981
136	History of Song Dynasty (宋史)	The emperor personally performed rain prayers	太平兴国六年四月辛未，幸太平兴国寺祷雨。	On the day of Xinwei in the fourth month of the sixth year of the Taiping Xingguo era, the emperor visited Taiping Xingguo Temple to pray for rain.	981.5.10	981
137	History of Song Dynasty (宋史)	Officials were dispatched to perform rain prayers	太平兴国七年三月乙巳，以旱分遣中黄门遍祷方岳。	On the day of Yisi in the third month of the seventh year of the Taiping Xingguo era, due to drought, the court dispatched eunuchs to various sacred mountains to offer prayers.	982.4.9	982
138	History of Song Dynasty (宋史)	The emperor personally performed rain prayers	端拱二年五月，京师旱，秋七月至十一月，旱，上忧形于色，蔬食致祷。	In the second year of the Duangong era, during the fifth month, the capital experienced a drought. From the autumn seventh month until the eleventh month, the drought persisted. The emperor appeared deeply troubled, adopting a vegetarian diet and offering prayers.	989.8-989.12	989
139	History of Song Dynasty (宋史)	Officials were dispatched to perform rain prayers	淳化元年四月庚戌，遣中使诣五岳祷雨，虑囚，遣使分决诸道狱。	On the gengxu day of the fourth month in the first year of the Chunhua era, imperial envoys were dispatched to the Five Sacred Mountains to pray for rain. Prisoners were reviewed for possible clemency, and officials were sent to various circuits to adjudicate legal cases.	990.5.2	990
140	History of Song Dynasty (宋史)	The emperor personally performed rain prayers	淳化元年正月至四月，不雨，帝蔬食祈雨。河南、凤翔、大名、京兆府、许、沧、单、汝、乾、郑、同等州旱。	From the first to the fourth month of the first year of the Chunhua era, there was no rain, and the emperor abstained from meat to pray for rain. Drought struck Henan, Fengxiang, Daming, the capital prefecture, Xu, Cang, Shan, Ru, Qian, Zheng, Tong, and other prefectures.	990	990
141	History of Song Dynasty (宋史)	The emperor personally performed rain prayers	淳化二年闰二月戊寅，祷雨。	On the intercalary second month, day Wuyin of the second year of the Chunhua era, prayers for rain were offered.	991.3.26	991
142	History of Song Dynasty (宋史)	The emperor personally performed rain prayers	淳化二年三月己巳，以岁蝗旱祷雨弗应，手诏宰相吕蒙正等：「朕将自焚，以答天谴。」翌日而雨，蝗尽死。	In the second year of the Chunhua era, on the day of Jisi in the third month, due to the locust plague and drought, prayers for rain had gone unanswered. Emperor Taizong of Song personally issued an edict to his chancellor Lü Mengzheng and others: "I shall immolate myself in response to Heaven's rebuke." The following day, rain fell, and the locusts all perished.	991.5.16	991
143	History of Song Dynasty (宋史)	Officials were dispatched to perform rain prayers	至道元年二月甲申，命宰相祷雨。戊戌，以旱虑囚，减流罪以下。丙午，雨。	On the jiashen day of the second month in the first year of the Zhidao era, the emperor ordered the chancellor to pray for rain. On the wuxu day, due to the drought, a review of criminal cases was conducted, and sentences for crimes punishable by exile or lesser penalties were reduced. On the bingwu day, rain fell.	995.3.11	995
144	History of Song Dynasty (宋史)	Officials were dispatched to perform rain prayers	至道二年三月丙寅，以京师旱，遣中使祷雨。	On the bingyin day of the third month in the second year of the Zhidao era, due to the drought in the capital, palace envoys were dispatched to pray for rain.	996.4.16	996
145	History of Song Dynasty (宋史)	Officials were dispatched to perform rain prayers	至道二年三月戊辰，命宰臣祀郊庙、社稷祷雨。	On the Wuchen day of the third month in the second year of the Zhidao era, the prime minister was ordered to offer sacrifices at the suburban altars, the ancestral temple, and the altars of soil and grain to pray for rain.	996.4.18	996
146	History of Song Dynasty (宋史)	The emperor personally performed rain prayers	咸平元年四月，旱。壬辰，祷白鹿山。	In April of the first year of the Xianping era, a drought occurred. On the Renchen day, prayers were offered at Mount Bailu.	998.5.5	998
147	Liao History (辽史)	The emperor personally performed rain prayers	统和十六年夏四月己酉，祈雨。	On the jiyou day in the fourth month of summer during the sixteenth year of the Tonghe era, a prayer for rain was offered.	998.5.19	998
148	History of Song Dynasty (宋史)	The emperor personally performed rain prayers	咸平元年五月甲子，幸大相国寺祈雨，升殿而雨。	On the first day of the fifth month in the first year of the Xianping era, the emperor visited the Great Xiangguo Temple to pray for rain. As he ascended the hall, rain began to fall.	998.6.3	998
149	History of Song Dynasty (宋史)	Officials were dispatched to perform rain prayers	咸平二年旱，诏有司祠雷师、雨师。	In the second year of the Xianping era, a drought occurred, and an imperial edict was issued ordering the relevant officials to offer sacrifices to the God of Thunder and the God of Rain.	999	999
150	History of Song Dynasty (宋史)	The emperor personally performed rain prayers	咸平二年闰三月戊子，幸太一宫、天清寺祈雨。	On the day of Wuzi in the intercalary third month of the second year of the Xianping era, the emperor visited the Taiyi Palace and Tianqing Temple to pray for rain.	999.4.23	999
151	History of Song Dynasty (宋史)	The emperor personally performed rain prayers	咸平四年二月丁未，祈雨。	On the Dingwei day in the second month of the fourth year of the Xianping era, prayers for rain were offered.	1001.3.2	1001
152	History of Song Dynasty (宋史)	The emperor personally performed rain prayers	咸平四年二月丁巳，幸大相国寺、上清宫祈雨。	On the DingSi day of the second month in the fourth year of the Xianping era, the emperor visited the Great Xiangguo Temple and Shangqing Palace to pray for rain.	1001.3.12	1001
153	History of Song Dynasty (宋史)	The emperor personally performed rain prayers	王素：京师旱，素请帝祷于郊，帝曰：「太史言月二日当雨，今将以旦日出祷。」素曰：「臣非太史，然度是日必不雨。帝问故，曰：「陛下知其且雨而祷之，应天不以诚，故臣知不雨。」帝曰：「然则明日诣醴泉观。」素曰：「醴泉之近，犹外朝耳，岂惮暑不远出邪？」帝悚然。更诏诣西太一宫，谏官故不在属车间，乃命素扈从。日甚炽，埃氛翳空，比舆驾还，未薄城，天大雷电而雨。	Wang Su: When the capital suffered a drought, Wang Su requested the emperor to pray for rain in the suburbs. The emperor said, "The court astronomer predicts rain on the second day of the month. I plan to go out at dawn to pray." Wang Su replied, "I am not an astronomer, but I surmise it will not rain that day." When the emperor asked why, he said, "Your Majesty knows it will rain soon and then p…	1004宋真宗景德元年	1004
154	History of Song Dynasty (宋史)	Officials were dispatched to perform rain prayers	景德元年闰九月壬申，江南旱，遣使决狱，访民疾苦，祠境内山川。	In the intercalary ninth month of the first year of the Jingde era, on the renchen day, due to a drought in Jiangnan, envoys were dispatched to adjudicate legal cases, inquire about the people's hardships, and perform rituals at the mountains and rivers within the region.	1004.11.6	1004
155	History of Song Dynasty (宋史)	Officials were dispatched to perform rain prayers	景德三年五月旱，又以《画龙祈雨法》付有司刊行。	In May of the third year of the Jingde era, a drought occurred, and the "Method of Painting Dragons to Pray for Rain" was again entrusted to the relevant authorities for publication.	1006.5.30-1006.6.27	1006
156	History of Song Dynasty (宋史)	Officials were dispatched to perform rain prayers	大中祥符二年旱，遣司天少监史序祀玄冥五星于北郊，除地为坛，望告。	In the second year of the Dazhong Xiangfu era, a drought occurred. The court dispatched Shi Xu, the Deputy Director of the Astronomical Bureau, to perform rituals honoring Xuanming and the Five Planets at the northern suburbs. An altar was constructed on cleared ground for the ceremonial supplication.	1009	1009
157	History of Song Dynasty (宋史)	The emperor personally performed rain prayers	大中祥符二年二月乙巳，幸大相国等寺、上清宫祈雨。	On the day of Yisi in the second month of the second year of the Dazhong Xiangfu era, the emperor visited the Daxiangguo Temple and the Shangqing Palace to pray for rain.	1009.3.18	1009
158	History of Song Dynasty (宋史)	Officials were dispatched to perform rain prayers	大中祥符二年二月戊申，遣使祠太乙，祀玄冥。己酉，雨。	On the wushen day of the second month in the second year of the Dazhong Xiangfu era, envoys were dispatched to offer sacrifices to the Taiyi deity and worship Xuanming. On the following day, youjiu, it rained.	1009.3.21	1009
159	History of Song Dynasty (宋史)	Officials were dispatched to perform rain prayers	大中祥符二年夏四月乙未，河北旱，遣使祠北岳。	In the summer, the fourth month, on the day Yiwei, of the second year of the Dazhong Xiangfu era, there was a drought in Hebei, and envoys were dispatched to offer sacrifices at the Northern Peak.	1009.5.7	1009
160	History of Song Dynasty (宋史)	Officials were dispatched to perform rain prayers	大中祥符二年五月庚辰，陜西旱，遣使祷太平宫、后土、西岳、河渎诸祠。	On the gengchen day of the fifth month in the second year of the Dazhong Xiangfu era, a drought occurred in Shaanxi. Envoys were dispatched to offer prayers at the Taiping Palace, the Temple of the Earth, the Western Sacred Mountain, and the various shrines of the River Deities.	1009.6.21	1009
161	History of Song Dynasty (宋史)	The emperor personally performed rain prayers	大中祥符八年二月，癸酉，祈雨。	On the day of Guiyou in the second month of the eighth year of the Dazhong Xiangfu era, prayers for rain were offered.	1015.3.15	1015
162	History of Song Dynasty (宋史)	The emperor personally performed rain prayers	天禧元年三月辛丑，以不雨，祷于四海。壬寅，不雨，罢上巳宴。	In the third month of the first year of Tianxi, on the day Xinyin, prayers were offered to the four seas due to the lack of rain. On the following day, Renyin, as the rain still did not fall, the Shangsi Festival banquet was canceled.	1017.4.1	1017
163	History of Song Dynasty (宋史)	The emperor personally performed rain prayers	天圣五年六月甲戌，祈雨于玉清昭应宫、开宝寺。	On the day of Jiaxu in the sixth month of the fifth year of the Tiansheng era, prayers for rain were offered at the Yuqing Zhaoying Palace and the Kaibao Temple.	1027.7.11	1027
164	History of Song Dynasty (宋史)	The emperor personally performed rain prayers	明道二年三月丁亥，祈雨于会灵观、上清宫、景德开宝寺。	On the dinghai day in the third month of the second year of the Mingdao era, prayers for rain were held at Huiling Temple, Shangqing Palace, and Jingde Kaibao Temple.	1033.4.23	1033
165	History of Song Dynasty (宋史)	Officials were dispatched to perform rain prayers	景佑三年六月，河北久旱，遣使诣北岳祈雨。	In June of the third year of the Jingyou era, Hebei had suffered a prolonged drought, so envoys were dispatched to Mount Bei to pray for rain.	1036.6.27-1036.7.25	1036
166	Liao History (辽史)	The emperor personally performed rain prayers	重熙九年六月，射柳祈雨。	In the sixth month of the ninth year of the Chongxi era, willows were shot in a rain-praying ceremony.	1040.7.12-1040.8.10	1040
167	History of Song Dynasty (宋史)	Officials were dispatched to perform rain prayers	庆历元年九月丁未，遣官祈雨。	On the dingwei day in the ninth month of the first year of the Qingli era, officials were dispatched to pray for rain.	1041.9.28	1041
168	History of Song Dynasty (宋史)	The emperor personally performed rain prayers	庆历二年六月戊寅，祈雨。	On the sixth day of the sixth month in the second year of the Qingli era, prayers for rain were offered.	1042.6.26	1042
169	History of Song Dynasty (宋史)	The emperor personally performed rain prayers	庆历二年六月戊寅，祈雨。	On the sixth day of the sixth month in the second year of the Qingli era, a prayer for rain was offered.	1042.6.26	1042
170	History of Song Dynasty (宋史)	Officials were dispatched to perform rain prayers	庆历三年，遣使诣岳渎祈雨。	In the third year of the Qingli era, envoys were dispatched to the sacred mountains and rivers to pray for rain.	1043	1043
171	History of Song Dynasty (宋史)	The emperor personally performed rain prayers	庆历三年五月庚辰，祈雨于相国寺、会灵观。	On the Gengchen day of the fifth month in the third year of the Qingli era, prayers for rain were held at Xiangguo Temple and Huiling Taoist Temple.	1043.6.23	1043
172	History of Song Dynasty (宋史)	Officials were dispatched to perform rain prayers	庆历四年三月癸亥朔，以旱遣内侍祈雨。	On the first day of the third month in the fourth year of the Qingli era, court eunuchs were dispatched to pray for rain due to the drought.	1044.4.1	1044
173	History of Song Dynasty (宋史)	Officials were dispatched to perform rain prayers	庆历四年三月丙寅，遣内侍两浙、淮南、江南祠庙祈雨。	On the day of Bingyin in the third month of the fourth year of the Qingli era, imperial eunuchs were dispatched to temples in Liangzhe, Huainan, and Jiangnan to pray for rain.	1044.4.4	1044
174	History of Song Dynasty (宋史)	The emperor personally performed rain prayers	庆历五年二月辛亥，祈雨于相国天清寺、会灵祥源观。	On the day of Xinhai in the second month of the fifth year of the Qingli era, prayers for rain were offered at Xiangguo Tianqing Temple and Huiling Xiangyuan Taoist Temple.	1045.3.15	1045
175	History of Song Dynasty (宋史)	Officials were dispatched to perform rain prayers	庆历六年四月壬申，遣使祈雨。	On the renchen day of the fourth month in the sixth year of the Qingli era, envoys were dispatched to pray for rain.	1046.5.30	1046
176	History of Song Dynasty (宋史)	Officials were dispatched to perform rain prayers	庆历七年二月丙寅：七年正月，京师不雨。二月丙寅，遣官岳渎祈雨。	February, Bingyin day, 7th year of the Qingli era: In the first month of the seventh year, the capital experienced no rainfall. On the Bingyin day of the second month, officials were dispatched to perform rain-praying rituals at the sacred mountains and rivers.	1047.3.20	1047
177	History of Song Dynasty (宋史)	The emperor personally performed rain prayers	庆历七年三月辛丑，西太乙宫祈雨。	On the day Xinchou in the third month of the seventh year of the Qingli era, prayers for rain were held at the Western Taiyi Palace.	1047.4.24	1047
178	History of Song Dynasty (宋史)	Officials were dispatched to perform rain prayers	皇祐元年五月丁未，遣官祈雨。	On the day Dingwei in the fifth month of the first year of the Huangyou era, officials were dispatched to pray for rain.	1049.6.18	1049
179	History of Song Dynasty (宋史)	Officials were dispatched to perform rain prayers	皇祐二年三月甲午，遣官祈雨。	On the day of Jiayin in the third month of the second year of the Huangyou era, officials were dispatched to pray for rain.	1050.4.1	1050
180	History of Song Dynasty (宋史)	Officials were dispatched to perform rain prayers	皇祐三年，恩、冀诸州旱。三月，分遣朝臣诣天下名山大川祠庙祈雨。	In the third year of the Huangyou era, drought struck Enzhou, Jizhou, and neighboring regions. In March, court officials were dispatched to offer prayers for rain at renowned mountains, great rivers, and temple shrines across the land.	1051.4.14-1051.5.12	1051
181	History of Song Dynasty (宋史)	Officials were dispatched to perform rain prayers	至和二年四月甲午，遣官祈雨。	On the day of Jiamu in the fourth month of the second year of the Zhihe era, officials were dispatched to pray for rain.	1055.5.5	1055
182	History of Song Dynasty (宋史)	The emperor personally performed rain prayers	嘉祐七年三月甲子，罢春燕，以久旱故也。辛丑，西太乙宫祈雨。	On the day of Jiazi in the third month of the seventh year of the Jiayou era, the spring banquet was canceled due to prolonged drought. On the day of Xinchou, prayers for rain were held at the Western Taiyi Palace.	1062.4.12-1062.5.11	1062
183	History of Song Dynasty (宋史)	The emperor personally performed rain prayers	嘉祐七年三月乙丑，祈雨于西太一宫。	On the Yichou day of the third month in the seventh year of the Jiayou reign, prayers for rain were offered at the Western Taiyi Palace.	1062.4.29	1062
184	History of Song Dynasty (宋史)	The emperor personally performed rain prayers	王畴：时大臣亦有请，帝乃出祷雨，都人瞻望欢呼。	Wang Chou: As high-ranking officials also made the request, the emperor went out to pray for rain, drawing the hopeful gaze and joyful cheers of the capital's residents.	1043	1043
185	History of Song Dynasty (宋史)	The emperor personally performed rain prayers	韩琦：英宗暴得疾，太后垂帘听政。帝疾甚，举措或改常度，遇宦官尤少恩。左右多不悦者，乃共为谗间，两宫遂成隙。琦与欧阳修奏事帘前，太后呜咽流涕，具道所以。帝大感悟。及疾愈，琦请乘舆因祷雨具素服以出，人情乃安。太后还政，拜琦右仆射，封魏国公。	Han Qi: Emperor Yingzong suddenly fell seriously ill, and Empress Dowager Cao assumed regency behind the lowered screen. The emperor, gravely ill, sometimes acted out of character and treated the eunuchs with particular harshness. Many of the attendants were displeased and collectively slandered him, creating a rift between the emperor and the empress dowager. When Han Qi and Ouyang Xiu presented…	1064	1064
186	History of Song Dynasty (宋史)	The emperor personally performed rain prayers	治平元年四月甲午，祈雨于相国天清寺、醴泉观。	On the jiawu day of the fourth month in the first year of the Zhiping era, prayers for rain were held at Xiangguo Tianqing Temple and Liquan Guan.	1064.5.17	1064
187	History of Song Dynasty (宋史)	Officials were dispatched to perform rain prayers	治平四年五月辛巳，以久旱，命宰臣祷雨。	On the day Xinsi of the fifth month in the fourth year of the Zhiping era, due to a prolonged drought, the prime minister was ordered to pray for rain.	1067.6.18	1067
188	History of Song Dynasty (宋史)	The emperor personally performed rain prayers	熙宁元年正月壬辰，幸寺观祈雨。	On the Renchen day of the first month in the first year of the Xining era, the emperor visited temples and Taoist monasteries to pray for rain.	1068.2.24	1068
189	History of Song Dynasty (宋史)	Officials were dispatched to perform rain prayers	熙宁元年四月戊申，命宰臣祷雨。辛亥，同天节，群臣及辽使初上寿于紫宸殿。	On the fourth day of the fourth month in the first year of the Xining era, the emperor ordered the prime minister to pray for rain. On the seventh day, the Tongtian Festival was celebrated, and for the first time, court officials and envoys from Liao offered their congratulations in the Zichen Hall.	1068.5.10	1068
190	History of Song Dynasty (宋史)	Officials were dispatched to perform rain prayers	熙宁二年三月丙戌，命宰臣祷雨。乙未，以旱虑囚。	On the third day of the third month in the second year of the Xining era, the prime minister was ordered to pray for rain. On the twelfth day, prisoners were reviewed due to the drought.	1069.4.13	1069
191	History of Song Dynasty (宋史)	The emperor personally performed rain prayers	熙宁四年二月丁丑，祷雨。诏增漳河等役兵。	On the dingchou day in the second month of the fourth year of the Xining era, prayers for rain were offered. An imperial decree was issued to increase the number of laborers for projects such as the Zhang River.	1071.3.25	1071
192	History of Song Dynasty (宋史)	The emperor personally performed rain prayers	熙宁六年五月戊申，祷雨。	On the fifth day of the fifth month in the sixth year of the Xining era, prayers were offered for rain.	1073.6.13	1073
193	History of Song Dynasty (宋史)	The emperor personally performed rain prayers	熙宁六年七月己酉，祷雨。	On the day of Jiyou in the seventh month of the sixth year of the Xining era, prayers for rain were offered.	1073.8.13	1073
194	History of Song Dynasty (宋史)	Officials were dispatched to perform rain prayers	熙宁六年九月戊申，诏兴水利。戊辰，诏祷雨，决狱。	On the day Wushen in the ninth month of the sixth year of the Xining era, an imperial edict was issued to promote water conservancy projects. On the day Wuchen, another edict was issued to pray for rain and adjudicate legal cases.	1073.10.31	1073
195	History of Song Dynasty (宋史)	The emperor personally performed rain prayers	熙宁七年二月乙丑，祷雨。	On the second day of the second month in the seventh year of the Xining era, a prayer for rain was offered.	1074.3.1-1074.3.29	1074
196	History of Song Dynasty (宋史)	Officials were dispatched to perform rain prayers	熙宁十年四月，以夏旱，内出《蜥蜴祈雨法》：捕蜥蜴数十纳瓮中，渍之以杂木叶，择童男十三岁下、十岁上者二十八人，分两番，衣青衣，以青饰面及手足，人持柳枝沾水散洒，昼夜环绕，诵咒曰：「蜥蜴蜥蜴，兴云吐雾，雨令滂沱，令汝归去！」雨足。	In the fourth month of the tenth year of the Xining era, due to a summer drought, the "Lizard Rain-Prayer Method" was issued from the imperial court: capture dozens of lizards and place them in urns, steeping them with various tree leaves. Select twenty-eight boys under thirteen and above ten years old, dividing them into two shifts. They are to wear blue-green robes, adorn their faces, hands, an…	1077.4.25-1077.5.24	1077
197	History of Song Dynasty (宋史)	The emperor personally performed rain prayers	熙宁十年七月甲寅，祷雨。	On the jia-yin day in the seventh month of the tenth year of the Xining era, prayers were offered for rain.	1077.7.28	1077
198	History of Song Dynasty (宋史)	Officials were dispatched to perform rain prayers	元丰三年二月丁巳，命辅臣祷雨。	On the dingwei day of the second month in the third year of the Yuanfeng era, the emperor ordered his ministers to pray for rain.	1080.3.17	1080
199	History of Song Dynasty (宋史)	Imperial clan members personally performed rain prayers	魏国大长公主，帝第二女，母曰宣仁圣烈皇后。神宗立，进舒国长公主，改蜀国，下嫁左卫将军王诜。间遇旱暵，帝降损以祷，主亦如之，曰：「我奉赐皆出公上，固应同其僳戚。」宋神宗元丰三年	Princess Dazhang of Wei, the second daughter of Emperor Yingzong, was born to Empress Xuanren. When Emperor Shenzong ascended the throne, she was elevated to Princess of Shu and married Wang Shen, General of the Left Guard. During a drought, the emperor reduced his meals and prayed for rain, and the princess followed suit, saying, "All my provisions come from the court, so I should share its worr…	1080	1080
200	Liao History (辽史)	The emperor personally performed rain prayers	大康六年五月康寅，以旱，祷雨，命左右以水相沃，俄而雨降。	On the fifth day of the fifth month in the sixth year of Dakang, due to drought, prayers for rain were offered. The emperor ordered his attendants to pour water over each other, and soon after, rain began to fall.	1080.6.18	1080
201	History of Song Dynasty (宋史)	The emperor personally performed rain prayers	元祐元年春正月丙辰，久旱，幸相国寺祈雨。	On the first lunar month of the first year of Yuanyou, during the Bingchen period, a prolonged drought occurred. The emperor visited Xiangguo Temple to pray for rain.	1086.2.13	1086
202	History of Song Dynasty (宋史)	The emperor personally performed rain prayers	元祐五年二月辛丑，以旱罢，修黄河。癸卯，祷雨岳渎，罢浚京城壕。	On the Xinchou day of the second month in the fifth year of Yuanyou, the Yellow River dredging project was suspended due to drought. On the Guimao day, prayers for rain were offered to the mountain and river deities, and the excavation of the capital's moat was halted.	1090.3.9	1090
203	History of Song Dynasty (宋史)	The emperor personally performed rain prayers	元符二年三月乙丑，祈雨。	On the third day of the third month in the second year of the Yuanfu era, prayers for rain were offered.	1099.4.15	1099
204	History of Song Dynasty (宋史)	The emperor personally performed rain prayers	王仔昔：政和中，徽宗召见，赐号冲隐处士。帝以旱祷雨，每遣小黄门持纸求仔昔画，日又至，忽篆符其上，仍细书"焚符汤沃而洗之"。	Wang Zai Xi: During the Zhenghe era, Emperor Huizong summoned him and bestowed upon him the title "Recluse of Transcendence." The emperor prayed for rain during a drought, frequently dispatching young eunuchs with paper to request drawings from Zai Xi. One day, as another request arrived, he suddenly inscribed a talisman on it, adding in small characters: "Burn the talisman, steep it in hot water…	1111-1117	1111-1117
205	Liao History (辽史)	The emperor personally performed rain prayers	乾统八年六月丙申，射柳祈雨。	On the bingshen day of the sixth month in the eighth year of Qiantong, willow shooting was performed to pray for rain.	1108.7.27	1108
206	History of Song Dynasty (宋史)	The emperor personally performed rain prayers	宣和四年二月丙申，以旱祷于广圣宫，即日雨。	On the bing-shen day of the second month in the fourth year of the Xuanhe era, prayers for rain were offered at the Guang Sheng Palace, and rain fell that very day.	1122.3.16	1122
207	History of Song Dynasty (宋史)	The emperor personally performed rain prayers	绍兴三年四月，旱，至于七月，帝蔬食露祷，乃雨。	In the third year of the Shaoxing era, a drought began in April and lasted until July. The emperor abstained from rich foods and prayed in the open air, after which rain finally fell.	1133.5.7-1133.8.31	1133
208	History of Song Dynasty (宋史)	Officials were dispatched to perform rain prayers	汪应辰：初任，赵鼎为帅，幕府事悉谘焉。岁小旱，命应辰祷雨名山即应，越人语之曰：「此相公雨。」鼎曰：「不然，乃状元雨也。」	When Wang Yingchen first assumed office, Zhao Ding served as the regional commander, and all matters of the military headquarters were consulted with him. During a minor drought one year, Yingchen was ordered to pray for rain at a famous mountain, and it immediately rained. The people of Yue remarked, "This is the minister's rain." Zhao Ding said, "No, this is the zhuangyuan's rain."	1135	1135
209	History of Song Dynasty (宋史)	The emperor personally performed rain prayers	绍兴五年六月癸丑，以久旱，减膳、祈祷。戊午，减福建贡茶岁额之半。庚申，以旱罢诸路检察财用官。	On the guichou day in the sixth month of the fifth year of the Shaoxing era, due to a prolonged drought, the emperor reduced his meals and offered prayers. On the wuwu day, the annual tribute of tea from Fujian was halved. On the gengshen day, the officials responsible for supervising financial expenditures in various circuits were dismissed because of the drought.	1135.7.23	1135
210	History of Song Dynasty (宋史)	Officials were dispatched to perform rain prayers	绍兴七年春，旱七十馀日，时帝将如建业，随所在分遣从臣，有事于名山大川。	In the spring of the seventh year of Shaoxing, a drought persisted for over seventy days. At that time, the emperor was preparing to depart for Jianye, and he dispatched accompanying officials to various locations to conduct rituals at renowned mountains and great rivers.	1137	1137
211	History of Song Dynasty (宋史)	Officials were dispatched to perform rain prayers	绍兴七年：是岁七月，张浚等言：「雨泽稍愆，乞祷。」上曰：「朕患不知四方水旱之实，宫中种稻两区，其一地下，其一地高，高者其苗有槁意矣，须精加祈祷，以救旱□。」	In the seventh year of the Shaoxing era (1137 CE), in the seventh month of the year, Zhang Jun and others reported: "Rainfall has been somewhat deficient, and we request prayers for rain." The Emperor responded: "My concern is not knowing the true extent of floods and droughts across the realm. In the palace, I have planted two plots of rice—one on low ground and one on high ground. The seedlings…	1137.7.20-8.18	1137
212	History of Song Dynasty (宋史)	The emperor personally performed rain prayers	绍兴九年六月，旱六十馀日，有事于山川。	In June of the ninth year of the Shaoxing era, a drought persisted for over sixty days, and ceremonies were held to the mountains and rivers.	1139	1139
213	History of Song Dynasty (宋史)	The emperor personally performed rain prayers	绍兴十一年七月，旱。戊申，有事于岳渎。	In the seventh month of the eleventh year of the Shaoxing era, a drought occurred. On the day Wushen, a ritual was performed to the mountains and rivers.	1141.8	1141
214	History of Song Dynasty (宋史)	The emperor personally performed rain prayers	绍兴十一年七月庚子，以翰林学士范同参知政事。以旱，减膳祈祷，遣官决滞狱，出系囚。	On the gengzi day of the seventh month in the eleventh year of the Shaoxing era, Fan Tong, a Hanlin academician, was appointed as a participant in the government affairs. Due to the drought, meals were reduced for prayers, officials were dispatched to adjudicate backlogged legal cases, and prisoners were released.	1141.8.7	1141
215	History of Song Dynasty (宋史)	The emperor personally performed rain prayers	绍兴十一年七月乙卯，祷雨于圜丘、方泽、宗庙。	On the day of Yimao in the seventh month of the eleventh year of the Shaoxing era, prayers for rain were offered at the Circular Mound, the Square Pond, and the ancestral temples.	1141.8.22	1141
216	History of Jin Dynasty (金史)	Officials were dispatched to perform rain prayers	大定四年五月，旱。乙巳，诏礼部尚书王竞祷雨于北岳。	In May of the fourth year of the Dading era, a drought occurred. On the 15th day of the month, an imperial decree ordered Wang Jing, the Minister of Rites, to pray for rain at the Northern Peak.	1164.6.12	1164
217	History of Jin Dynasty (金史)	Officials were dispatched to perform rain prayers	大定四年五月己酉，命参知政事石琚等于北郊望祭祷雨。壬子，雨。	On the day Jiyou in the fifth month of the fourth year of the Dading era, the councilor of state Shi Ju and others were ordered to perform a rain prayer ceremony with a distant offering at the northern suburbs. On the day Renzi, it rained.	1164.6.16	1164
218	History of Jin Dynasty (金史)	The emperor personally performed rain prayers	大定四年五月。后七日不雨，祈太社、太稷。	In the fourth year of the Dading era, on the seventh day of the fifth month, when no rain had fallen for seven consecutive days, prayers were offered to the Grand Altar of Soil and the Grand Altar of Grain.	1164.6.19	1164
219	History of Jin Dynasty (金史)	The emperor personally performed rain prayers	大定四年五月。又七日祈宗庙，不雨，仍从岳镇海渎如初祈。	On the seventh day of the fifth month in the fourth year of the Dading era, prayers were again offered at the ancestral temple, but no rain fell. The rituals for the mountains, fengs, seas, and rivers were then repeated as in the initial prayers.	1164.6.26	1164
220	History of Jin Dynasty (金史)	Officials were dispatched to perform rain prayers	大定四年六月。后十日不雨，乃徒市，禁屠杀，断伞扇，造土龙以祈。雨足则报祀，送龙水中。	On the tenth day of the sixth month in the fourth year of the Dading era, as no rain had fallen for ten consecutive days, the market was relocated, slaughtering was prohibited, umbrellas and fans were forbidden, and earthen dragons were crafted for rain rituals. When sufficient rain was obtained, ceremonial offerings were made in gratitude, and the dragons were returned to the waters.	1164.7.6	1164
221	History of Song Dynasty (宋史)	Imperial clan members personally performed rain prayers	彦橚字文长，悼王七世孙。彦橚登乾道二年进士第。尉乐清，会大旱，令循故事祷雨，而责租益急。彦橚曰：「损敛已责，所以和气，何祷为？」已而果雨。	Yan Su, styled Wen Chang, was the seventh-generation descendant of Prince Dao. He achieved the rank of Jinshi in the second year of the Qiandao era. While serving as the sheriff of Yueqing, a severe drought occurred. The magistrate followed the customary practice of praying for rain while pressing for tax collection more urgently. Yan Su remarked, "Reducing levies and forgiving debts is the way t…	1166	1166
222	History of Song Dynasty (宋史)	The emperor personally performed rain prayers	乾道四年夏六月，旱，帝将撤盖亲祷于太乙宫而雨。	In the summer of the fourth year of the Qiandao era, during the sixth month, a drought occurred. The emperor prepared to remove his ceremonial canopy and personally offer prayers at the Taiyi Palace, after which rain fell.	1168.7.7-1168.8.4	1168
223	History of Song Dynasty (宋史)	Officials were dispatched to perform rain prayers	乾道四年八月，诏颁皇佑祀龙法于郡县。	In the eighth month of the fourth year of the Qiandao era, an imperial decree was issued to promulgate the Huangyou ritual regulations for dragon worship to the prefectures and counties.	1168.9.4-1168.10.2	1168
224	History of Song Dynasty (宋史)	Officials were dispatched to perform rain prayers	乾道四年八月乙未，班祈雨雪之法于诸路。	On the day Yǐwèi in the eighth month of the fourth year of the Qiandao era, the method for praying for rain and snow was promulgated to all administrative circuits.	1168.9.9	1168
225	History of Jin Dynasty (金史)	Officials were dispatched to perform rain prayers	大定十二年四月，旱。癸亥，以久旱，命铸祠山川。	In the fourth month of the twelfth year of the Dading era, a drought occurred. On the Guihai day, due to the prolonged drought, an order was issued to cast ritual vessels for sacrifices to the mountains and rivers.	1172.5.19	1172
226	History of Song Dynasty (宋史)	The emperor personally performed rain prayers	刘珙：上尝以久旱齐居祷雨，一夕而应，珙进言曰：「陛下诚心感格，其应如响，天人相与之际，真不容发，隐微纤芥之失，其应岂不亦犹是乎？臣愿益谨其独。」上竦然称善。	Liu Gong: The Emperor once prayed for rain during a prolonged drought while observing a fast, and it rained the very night. Gong remarked, "Your Majesty's sincere heart has moved the heavens, eliciting an immediate response. The interaction between Heaven and humanity is indeed as delicate as a hair's breadth. Should there be the slightest fault, however hidden or minor, would the response not be…	1175	1175
227	History of Song Dynasty (宋史)	The emperor personally performed rain prayers	罗点：岁旱，诏求言，点上封事，谓：「今时奸谀日甚，议论凡陋。无所可否，则曰得体；与世浮沈，则曰有量；众皆默，己独言，则曰沽名；众皆浊，己独清，则曰立异。此风不革，陛下虽欲大有为于天下，未见其可也。自旱叹为虐，陛下祷群祠，赦有罪，曾不足以感动。及朝求谠言，夕得甘雨，天心所示，昭然不诬。独不知陛下之求言，果欲用之否乎？如欲用之，则愿以所上封事，反覆详熟，当者审而后行，疑者咨而后决，如此则治象日著，而乱萌自消矣。」	Luo Dian: During a year of drought, an imperial edict called for remonstrances. Luo Dian submitted a memorial, stating: "Nowadays, deceit and flattery grow worse by the day, and discussions have become shallow and vulgar. Those who take no stance on right or wrong are called 'tactful'; those who drift with the tide are deemed 'magnanimous'; when all remain silent and one alone speaks out, he is a…	1176	1176
228	History of Jin Dynasty (金史)	Officials were dispatched to perform rain prayers	大定十六年五月庚申，遣使祷雨静宁山神，有顷而雨。	On the gengshen day of the fifth month in the sixteenth year of the Dading era, an envoy was dispatched to pray for rain at the mountain deity of Jingning. Rain began to fall shortly thereafter.	1176.6.24	1176
229	History of Song Dynasty (宋史)	The emperor personally performed rain prayers	淳熙五年，常、绵州、镇江府及淮南、江东西郡国旱，有事于山川群望。	In the fifth year of the Chunxi era, a severe drought struck Changzhou, Mianzhou, Zhenjiang Prefecture, as well as the Huainan, Jiangdong, and Jiangxi regions. Rituals were conducted to honor the mountains, rivers, and various deities.	1180.4.26-8.22	1180
230	History of Song Dynasty (宋史)	The emperor personally performed rain prayers	淳熙七年，湖南春旱，诸道自四月不雨，行都自七月不雨，皆至于九月。绍兴、隆兴、建康、江陵府、台、婺、常、润、江、筠、抚、吉、饶、信、徽、池、舒、蕲、黄、和、浔、衡、永州、兴国、临江、南康、无为军皆大旱，江、筠、徽、婺州、广德军、无锡县尤甚，祷雨于天地、宗庙、社稷、山川群望。	In the seventh year of the Chunxi reign (1180), a spring drought struck Hunan. From April onward, various regions experienced no rainfall, and the capital saw no rain from July until September. Severe droughts affected Shaoxing, Longxing, Jiankang, Jiangling Prefecture, as well as the regions of Tai, Wu, Chang, Run, Jiang, Yun, Fu, Ji, Rao, Xin, Hui, Chi, Shu, Qi, Huang, He, Xun, Heng, Yongzhou, …	1180	1180
231	History of Song Dynasty (宋史)	Officials were dispatched to perform rain prayers	淳熙七年七月丁卯，以旱，决系囚，分命群臣祷雨于山川。	On the dingmao day in the seventh month of the seventh year of the Chunxi reign, due to drought, prisoners were released, and officials were dispatched to pray for rain at mountains and rivers.	1180.8.9	1180
232	History of Jin Dynasty (金史)	Officials were dispatched to perform rain prayers	大定二十三年四月壬戌，幸寿安宫，剌有司为民祷雨。是夕，雨。	On the renxu day in the fourth month of the twenty-third year of the Dading era, the emperor visited the Shou'an Palace and ordered the officials to pray for rain on behalf of the people. That evening, rain fell.	1183.5.21	1183
233	History of Song Dynasty (宋史)	The emperor personally performed rain prayers	淳熙十年七月乙丑，以不雨，决系囚。丙寅，幸明庆寺祷雨。	On the day Yichou in the seventh month of the tenth year of the Chunxi reign, due to the lack of rain, prisoners in custody were adjudicated. The following day, Bingyin, an imperial visit was made to Mingqing Temple to pray for rain.	1183.7.24	1183
234	History of Song Dynasty (宋史)	Officials were dispatched to perform rain prayers	淳熙十年七月甲戌，以夏秋旱□，避殿减膳，令侍从、台谏、两省、卿监、郎官、馆职各陈朝政阙失，分命群臣祷雨于天地、宗庙、社稷、山川。左丞相王淮等以旱乞罢，不许。丁丑，诏除灾伤州县淳熙八年欠税。甲申，雨。己丑，御殿复膳。	On the jiaxu day of the seventh month in the tenth year of the Chunxi reign, due to the summer and autumn drought, the emperor refrained from holding court sessions and reduced his meals. He ordered his retinue, censors, officials from both central government departments, ministers, court gentlemen, and academicians to each report on the shortcomings in court administration. Officials were dispat…	1183.8.1	1183
235	History of Jin Dynasty (金史)	The emperor personally performed rain prayers	大定二十五年四月，久不雨，帝亲祷，即日沾足。	On the twenty-fifth day of the fourth month in the twenty-fifth year of the Dading era, after a prolonged drought, the emperor personally offered prayers for rain, and the land was abundantly moistened that very day.	1185.5	1185
236	History of Song Dynasty (宋史)	The emperor personally performed rain prayers	淳熙十四年五月，旱。六月戊寅，有事于山川群望。	In May of the fourteenth year of the Chunxi era, a drought occurred. On the day of Wuyin in June, ceremonies were conducted for the mountains, rivers, and various deities.	1187.7.15	1187
237	History of Song Dynasty (宋史)	Officials were dispatched to perform rain prayers	淳熙十四年六月戊寅，以久旱，班画龙祈雨法。	On the day of Wuyin in the sixth month of the fourteenth year of the Chunxi reign, due to prolonged drought, the method of painting dragons to pray for rain was promulgated.	1187.7.15	1187
238	History of Song Dynasty (宋史)	The emperor personally performed rain prayers	淳熙十四年六月甲申，幸太一宫、明庆寺祷雨。	On the jiashen day of the sixth month in the fourteenth year of the Chunxi reign, an imperial visit was made to the Taiyi Palace and Mingqing Temple to pray for rain.	1187.7.21	1187
239	History of Song Dynasty (宋史)	The emperor personally performed rain prayers	淳熙十四年七月己酉，大雩于圜丘，望于北郊，有事于岳、渎、海凡山川之神。	On the day of Jiyou in the seventh month of the fourteenth year of the Chunxi reign, a grand rain-seeking ceremony was held at the Circular Mound Altar, with offerings made to the northern suburbs, and rituals performed for the mountains, rivers, seas, and all deities of the sacred peaks and waterways.	1187.8.15	1187
240	History of Jin Dynasty (金史)	The emperor personally performed rain prayers	明昌元年五月乙卯：五月，不雨。乙卯，祈于北郊及太庙。	On the day of Yimao in the fifth month of the first year of the Mingchang era: In the fifth month, there was no rain. On the day of Yimao, prayers were offered at the northern suburbs and the Imperial Ancestral Temple.	1190.6.6	1190
241	History of Jin Dynasty (金史)	The emperor personally performed rain prayers	明昌元年五月壬戌，祈雨于社稷。	On the Renwu day of the fifth month in the first year of the Mingchang era, a rain prayer ceremony was held at the Altar of Soil and Grain.	1190.6.13	1190
242	History of Jin Dynasty (金史)	The emperor personally performed rain prayers	明昌元年五月己巳，复祈雨于太庙。	On the day of Jisi in the fifth month of the first year of the Mingchang era, prayers for rain were once again offered at the ancestral temple.	1190.6.20	1190
243	History of Jin Dynasty (金史)	The emperor personally performed rain prayers	明昌元年五月丙子，以祈雨，望祭岳镇海渎于北郊。	On the day of Bingzi in the fifth month of the first year of the Mingchang era, a ceremony was held in the northern suburbs to pray for rain, with offerings made to the mountains, peaks, seas, and rivers.	1190.6.27	1190
244	History of Jin Dynasty (金史)	Officials were dispatched to perform rain prayers	明昌三年三月丁酉，命有司祈雨，望祀岳镇海渎于北郊。	On the dingyou day of the third month in the third year of the Mingchang era, officials were ordered to pray for rain and conduct worship ceremonies to the mountains, towns, seas, and rivers at the northern suburbs.	1192.5.8	1192
245	History of Jin Dynasty (金史)	The emperor personally performed rain prayers	明昌三年四月甲辰，祈雨于社稷。	On the jiachen day of the fourth month in the third year of the Mingchang era, a rain prayer ceremony was held at the Altar of Soil and Grain.	1192.5.15	1192
246	History of Jin Dynasty (金史)	The emperor personally performed rain prayers	明昌三年四月丁卯：四月丙寅，以旱灾，下诏责躬。丁卯，复以祈雨，望祀岳镇海渎山川于北郊。	On the Dingmao day in the fourth month of the third year of the Mingchang era: On the Bingyin day of the fourth month, an imperial edict was issued to accept blame for personal responsibility due to the drought. On the Dingmao day, prayers for rain were again conducted, with offerings made to the mountains, seas, rivers, and sacred peaks from the northern suburbs.	1192.6.7	1192
247	History of Jin Dynasty (金史)	The emperor personally performed rain prayers	明昌三年五月甲戌，祈雨于社稷。	On the day of Jiasu in the fifth month of the third year of the Mingchang era, prayers for rain were offered at the Altars of Soil and Grain.	1192.6.14	1192
248	History of Jin Dynasty (金史)	Officials were dispatched to perform rain prayers	明昌五年五月戊子，桓、抚二州旱，遣使祷于缙山。	On the wuzi day of the fifth month in the fifth year of the Mingchang era, a drought struck the prefectures of Huan and Fu, and envoys were dispatched to offer prayers at Mount Jin.	1194.6.18	1194
249	History of Jin Dynasty (金史)	Officials were dispatched to perform rain prayers	承安元年三月丁酉，如万宁宫。不雨，遣宫望祭岳镇海渎于北郊。	On the day of Dingyou in the third month of the first year of the Cheng'an era, the emperor traveled to Wanning Palace. Due to the lack of rain, officials were dispatched to perform a distant worship ceremony to the mountains, peaks, seas, and rivers at the northern suburbs.	1196.4.17	1196
250	History of Jin Dynasty (金史)	Officials were dispatched to perform rain prayers	承安元年三月甲辰，遣参知政事尼厖古鉴祈雨于社稷。	On the day of Jiachen in the third month of the first year of the Cheng'an era, the Assistant Administrator of the Secretariat, Nimanggujian, was dispatched to offer prayers for rain at the Altars of Soil and Grain.	1196.4.24	1196
251	History of Jin Dynasty (金史)	Officials were dispatched to perform rain prayers	承安元年三月丁未，复遣使就祈雨于东岳。	On the Dingwei day of the third month in the first year of the Cheng'an era, envoys were once again dispatched to Mount Tai to pray for rain.	1196.4.27	1196
252	History of Jin Dynasty (金史)	Officials were dispatched to perform rain prayers	承安元年夏四月辛亥，命尚书右丞胥持国祈雨于太庙。	On the summer day of Xinhai in the fourth month of the first year of the Cheng'an era, the Right Vice Director of the Department of State Affairs, Xu Chiguo, was ordered to pray for rain at the Imperial Ancestral Temple.	1196.5.1	1196
253	History of Jin Dynasty (金史)	Officials were dispatched to perform rain prayers	承安元年四月乙丑，命御史大夫移剌仲方祈雨于社稷。	On the first day of the fourth month in the first year of the Cheng'an era, Yila Zhongfang, the Grand Censor, was ordered to pray for rain at the Altar of Soil and Grain.	1196.5.15	1196
254	History of Jin Dynasty (金史)	Officials were dispatched to perform rain prayers	承安元年四月壬申，命参知政事马琪祈雨于太庙。	On the ren-shen day of the fourth month in the first year of the Cheng'an era, the Assistant Administrator of the Secretariat, Ma Qi, was ordered to pray for rain at the Imperial Ancestral Temple.	1196.5.22	1196
255	History of Jin Dynasty (金史)	Officials were dispatched to perform rain prayers	承安元年四月戊寅，上以久不雨，命礼部尚书张暐祈于北岳。	On the wuyin day of the fourth month in the first year of the Cheng'an era, the emperor, due to the prolonged lack of rain, ordered Zhang Wei, the Minister of Rites, to offer prayers at the Northern Peak.	1196.5.28	1196
256	History of Jin Dynasty (金史)	Officials were dispatched to perform rain prayers	承安元年四月己卯，遣官望祭岳镇海渎于北郊。	On the day Jimao in the fourth month of the first year of the Cheng'an era, officials were dispatched to perform a ceremonial worship of the mountains, peaks, seas, and rivers at the northern suburbs.	1196.5.29	1196
257	History of Song Dynasty (宋史)	The emperor personally performed rain prayers	庆元二年五月辛巳，以旱，祷于天地、宗庙、祖稷。诏大理、三衙、临安府、两浙州县决系囚。乙酉，申严狱囚瘐死之罚。	On the day of Xinsi in the fifth month of the second year of the Qingyuan era, due to drought, prayers were offered to heaven and earth, the ancestral temple, and the altars of soil and grain. An edict was issued ordering the Dali Temple, the Three Judicial Offices, the Lin'an Prefecture, and the counties of the two Zhe regions to adjudicate the cases of prisoners. On the day of Yiyou, strict pen…	1196.5.31	1196
258	History of Song Dynasty (宋史)	The emperor personally performed rain prayers	庆元三年四月壬子，以旱祷于天地、宗庙、社稷。乙丑，雨雹。	On the renzi day in the fourth month of the third year of the Qingyuan era, prayers were offered to heaven, earth, the ancestral temple, and the state altars due to drought. On the yichou day, hail fell.	1197.4.27	1197
259	History of Jin Dynasty (金史)	Officials were dispatched to perform rain prayers	承安二年夏四月丙辰，命有司祈雨，望祭岳镇海渎于北郊。	In the summer of the second year of the Cheng'an era, on the bingchen day of the fourth month, officials were ordered to pray for rain and conduct a worship ceremony at the northern suburbs, offering sacrifices to the mountains, towns, seas, and rivers.	1197.5.1	1197
260	History of Jin Dynasty (金史)	The emperor personally performed rain prayers	承安二年四月甲子，祈雨于社稷。	On the day of Jiaz in the fourth month of the second year of the Cheng'an era, prayers for rain were offered at the Altars of Soil and Grain.	1197.5.9	1197
261	History of Jin Dynasty (金史)	Officials were dispatched to perform rain prayers	承安四年五月壬辰朔，以旱，下诏责躬，求直言，避正殿，减膳，审理冤狱，命奏事于泰和殿。戊戌，命有司望祭岳渎祷雨。己亥，应奉翰林文字陈载言四事：其一，边民苦于寇掠；其二，农民困于军须；其三，审决冤滞，一切从宽，茍纵有罪；其四，行省官员，例获厚赏，而沿边司县，曾不沾及，此亦干和气，致旱灾之所由也。上是之。	On the first day of the fifth month in the fourth year of the Cheng'an era, due to a drought, an imperial edict was issued accepting personal responsibility and seeking forthright advice. The emperor refrained from using the main audience hall, reduced his meals, reviewed cases of unjust imprisonment, and ordered that governmental affairs be reported at the Taihe Hall. On the eighth day, official…	1199.6.2	1199
262	History of Jin Dynasty (金史)	The emperor personally performed rain prayers	承安四年五月壬子，祈雨于太庙。	On the renzi day of the fifth month in the fourth year of the Cheng'an era, a prayer for rain was held at the Ancestral Temple.	1199.6.16	1199
263	History of Jin Dynasty (金史)	Officials were dispatched to perform rain prayers	承安五年三月壬戌，命有司祷雨。癸亥，雨。	On the Renxu day in the third month of the fifth year of the Cheng'an era, officials were ordered to pray for rain. On the following day, Guihai, it rained.	1200.4.21	1200
264	History of Song Dynasty (宋史)	The emperor personally performed rain prayers	庆元六年四月，旱；五月辛未，祷于郊丘、宗社。镇江府、常州大旱，水竭，淮郡自春无雨，首种不入，及京、襄皆旱。	In the fourth month of the sixth year of the Qingyuan era, a drought occurred. On the day Xinwei in the fifth month, prayers were offered at the suburban altar and the ancestral temples. Zhenjiang Prefecture and Changzhou suffered severe droughts, with water sources drying up. The Huai region had received no rain since spring, preventing the sowing of early crops. Drought conditions also extended…	1200.6.29	1200
265	History of Song Dynasty (宋史)	The emperor personally performed rain prayers	嘉泰元年五月，旱。丙辰，祷于郊丘、宗社。	In May of the first year of the Jiatai era, a drought occurred. On the bingchen day, prayers were offered at the suburban altar, imperial ancestral temple, and altars of the soil and grain.	1201.6.9	1201
266	History of Song Dynasty (宋史)	The emperor personally performed rain prayers	嘉泰元年五月戊午，以旱，祷于天地、宗庙、社稷，诏大理、三衙、临安府、两浙州县决系囚。	On the wuwu day of the fifth month in the first year of the Jiatai era, due to drought, prayers were offered to heaven and earth, the ancestral temples, and the gods of soil and grain. An edict was issued ordering the Dali Temple, the Three Capital Guards, the Lin'an Prefecture, and the counties of the two Zhejiang regions to adjudicate the cases of prisoners in custody.	1201.6.11	1201
267	History of Song Dynasty (宋史)	The emperor personally performed rain prayers	嘉泰元年五月戊辰，大雩于圜丘。	On the day of Wuchen in the fifth month of the first year of the Jiatai era, a grand rainmaking ceremony was held at the Circular Mound.	1201.6.21	1201
268	History of Jin Dynasty (金史)	The emperor personally performed rain prayers	泰和元年六月辛卯，祈雨于北郊。	On the sixth day of the sixth month in the first year of the Taihe era, a prayer for rain was held at the northern suburbs.	1201.7.14	1201
269	History of Song Dynasty (宋史)	The emperor personally performed rain prayers	嘉泰元年七月丁巳，以旱，复祷于天地、宗庙、社稷。	On the first day of the seventh month in the first year of the Jiatai era, prayers were offered again to heaven, earth, ancestral temples, and the altars of soil and grain due to the drought.	1201.8.9	1201
270	History of Song Dynasty (宋史)	The emperor personally performed rain prayers	嘉泰元年七月庚午，大雩于圜丘，祈于宗社。	On the Gengwu day of the seventh month in the first year of the Jiatai era, a grand rain-offering ceremony was held at the Circular Mound Altar, with prayers made to the ancestral temples and earth altars.	1201.8.22	1201
271	History of Jin Dynasty (金史)	Officials were dispatched to perform rain prayers	泰和二年四月癸卯，如万宁宫。命有司祈雨。	On the day Guimao in the fourth month of the second year of the Taihe era, the emperor visited Wanning Palace and ordered the officials to pray for rain.	1202.5.22	1202
272	History of Song Dynasty (宋史)	The emperor personally performed rain prayers	嘉泰二年春，旱，至于夏秋。七月庚午，大雩于圜丘，祈于宗社。	In the spring of the second year of the Jiatai era, a drought persisted through summer and autumn. On the fifteenth day of the seventh month, a grand rain-seeking ceremony was held at the circular mound altar, with prayers offered to the ancestral temples and earth altars.	1202.8.17	1202
273	History of Jin Dynasty (金史)	Officials were dispatched to perform rain prayers	泰和三年四月丁巳，敕有司祈雨，仍颁土龙法。	On the day of Dingsi in the fourth month of the third year of the Taihe era, an edict was issued instructing the relevant authorities to pray for rain, and the method of crafting an earthen dragon was promulgated accordingly.	1203.5.31	1203
274	History of Jin Dynasty (金史)	Officials were dispatched to perform rain prayers	泰和四年二月丁酉，以山东、河北旱，诏祈雨东、北二岳。	On the fourth day of the second month in the fourth year of the Taihe era, due to severe drought in Shandong and Hebei, an imperial decree was issued to pray for rain at the Eastern and Northern Sacred Mountains.	1204.3.6	1204
275	History of Jin Dynasty (金史)	Officials were dispatched to perform rain prayers	泰和四年三月癸酉，命大兴府祈雨。	On the day Guiyou in the third month of the fourth year of the Taihe era, the Daxing Prefecture was ordered to pray for rain.	1204.4.11	1204
276	History of Jin Dynasty (金史)	The emperor personally performed rain prayers	泰和四年三月乙酉，祈雨于北郊。	On the day of Yiyou in the third month of the fourth year of the Taihe era, prayers for rain were offered at the northern suburbs.	1204.4.23	1204
277	History of Jin Dynasty (金史)	The emperor personally performed rain prayers	泰和四年三月壬辰，祈雨于社稷。	On the Renchen day of the third month in the fourth year of the Taihe era, a rain prayer ceremony was held at the Altar of Soil and Grain.	1204.4.30	1204
278	History of Jin Dynasty (金史)	The emperor personally performed rain prayers	泰和四年四月己亥，祈雨于太庙。	On the fourth day of the fourth month in the fourth year of the Taihe era, prayers for rain were offered at the ancestral temple.	1204.5.7	1204
279	History of Jin Dynasty (金史)	The emperor personally performed rain prayers	泰和四年四月丙午，定衣服制。以祈雨，望祀岳镇海渎于北郊。	On the bingwu day of the fourth month in the fourth year of the Taihe era, regulations on ceremonial attire were established. To pray for rain, a worship ceremony was held at the northern suburbs, honoring the mountains, towns, seas, and rivers.	1204.5.14	1204
280	History of Jin Dynasty (金史)	The emperor personally performed rain prayers	泰和四年四月癸丑，祈雨于社稷。	On the Guichou day of the fourth month in the fourth year of the Taihe era, prayers for rain were offered to the gods of soil and grain.	1204.5.21	1204
281	History of Jin Dynasty (金史)	The emperor personally performed rain prayers	泰和四年四月庚申，祈雨于太庙。	On the gengshen day of the fourth month in the fourth year of the Taihe era, prayers for rain were offered at the ancestral temple.	1204.5.28	1204
282	History of Jin Dynasty (金史)	The emperor personally performed rain prayers	泰和四年五月乙丑，祈雨于北郊。有司请雩，诏三祷岳渎社稷宗庙，不雨，乃行之。	On the day of Yichou in the fifth month of the fourth year of the Taihe era, prayers for rain were offered at the northern suburbs. The officials requested a rainmaking ceremony, and an edict was issued to pray three times to the mountains, rivers, soil and grain, and the ancestral temples. When no rain came, the ceremony was then performed.	1204.6.2	1204
283	History of Song Dynasty (宋史)	The emperor personally performed rain prayers	嘉泰四年七月甲子，以旱，诏大理、三衙、临安府、两浙及诸路决系囚。戊辰，祷于天地、宗庙，社稷。己巳，命诸路提刑从宜断疑狱。蠲内外诸军逋负营运息钱。辛未，蠲两浙阙雨州县逋租。	On the day of Jiazi in the seventh month of the fourth year of the Jiatai era, due to drought, an edict was issued ordering the Dali Temple, the Three Capital Guards, the Lin'an Prefecture, the two Zhe regions, and various circuits to adjudicate and release prisoners. On the day of Wuchen, prayers were offered to Heaven and Earth, the ancestral temples, and the gods of soil and grain. On the day …	1204.8.4	1204
284	History of Jin Dynasty (金史)	Officials were dispatched to perform rain prayers	内族襄：时方旱，命有司祈雨，襄及平章政事张万公、参政仆散揆等上表待罪。	During a drought, he ordered officials to pray for rain. Neizu Xiang, along with the Grand Academician of the Palace Secretariat Zhang Wangong and the Assistant Administrator of the Department of State Affairs Pusán Kuí, submitted a memorial acknowledging their fault.	1206	1206
285	History of Song Dynasty (宋史)	The emperor personally performed rain prayers	开僖三年二月庚申，以旱，诏大理、三衙、临安府决系囚。甲子，振给旱伤州县贫民。命诸路提刑司从宜断疑狱。辛未，以旱，祷于天地、宗庙、社稷。命有司举行宽恤之政八条，蠲两淮被兵诸州今年租赋。乙亥，释两浙路杖以下囚。	On the gengshen day in the second month of the third year of the Kaixi era, due to drought, an imperial decree ordered the Dali Temple, the three imperial guard commands, and the Lin'an prefectural government to adjudicate cases involving prisoners in custody. On the jiazi day, relief provisions were distributed to impoverished people in drought-stricken prefectures and counties. Regional judicia…	1207.3.25	1207
286	History of Song Dynasty (宋史)	The emperor personally performed rain prayers	开僖三年五月己丑，以旱，祷于天地、宗庙、社稷。	On the day of Jichou in the fifth month of the third year of the Kaixi era, prayers were offered to heaven and earth, the ancestral temples, and the altars of soil and grain due to the drought.	1207.6.11	1207
287	History of Song Dynasty (宋史)	The emperor personally performed rain prayers	嘉定元年夏，旱，闰四月辛卯，祷于郊丘、宗社。	In the summer of the first year of the Jiading era, a drought occurred. On the Xīn-Mǎo day of the intercalary fourth month, prayers were offered at the suburban altar, imperial ancestral temple, and earth altars.	1208.6.7	1208
288	History of Song Dynasty (宋史)	The emperor personally performed rain prayers	嘉定元年闰四月丙申，幸太乙宫、明庆寺祷雨。丁酉，以旱，诏求言。	In the first year of the Jiading era, on the bingshen day of the intercalary fourth month, the emperor visited the Taiyi Palace and Mingqing Temple to pray for rain. On the dingyou day, due to the drought, an edict was issued to solicit remonstrations.	1208.6.12	1208
289	History of Song Dynasty (宋史)	The emperor personally performed rain prayers	嘉定二年夏四月，旱，首种不入，庚申，祷于郊丘、宗社。	In the summer of the second year of the Jiading era, during the fourth month, a drought occurred, and the first crops failed to sprout. On the Gengshen day, prayers were offered at the suburban altar, imperial ancestral temple, and altars of the soil and grain.	1209.5.6-6.3	1209
290	History of Song Dynasty (宋史)	The emperor personally performed rain prayers	嘉定二年五月丁酉，以旱，诏诸路监司决系囚，劾守令之贪残者，辛丑，申命州县捕蝗。己未，以旱，诏群臣上封事。庚申，祷于天地、宗庙、社稷。	On the dingyou day in the fifth month of the second year of the Jiading era, due to drought, an edict was issued ordering the supervising officials of all circuits to adjudicate prisoners and investigate corrupt and cruel prefects and magistrates. On the xinchou day, a further order was given to prefectures and counties to capture locusts. On the jiwei day, due to the drought, an edict was issued…	1209.7.1	1209
291	History of Song Dynasty (宋史)	The emperor personally performed rain prayers	嘉定二年六月乙酉，复祷雨于天地、宗庙、社稷。己丑，命江西、福建、二广丰稔诸州籴运以给临安，仍偿其费。	On the 15th day of the sixth month in the second year of the Jiading era, prayers for rain were once again offered to Heaven and Earth, the ancestral temples, and the altars of soil and grain. On the 19th day, orders were issued to the prosperous prefectures of Jiangxi, Fujian, Guangnan East, and Guangnan West to purchase and transport grain to supply Lin'an, with full reimbursement of their expe…	1209.7.26	1209
292	History of Jin Dynasty (金史)	Officials were dispatched to perform rain prayers	至宁元年七月，以河东、陜西诸处旱，遣工部尚书高朵剌祈雨于岩渎，至是雨足。时斗米有至钱万二千者。	In the seventh month of the first year of the Zhining era, due to severe drought in various regions of Hedong and Shaanxi, Gao Duola, the Minister of Works, was dispatched to offer prayers for rain at Yandu. Sufficient rainfall was subsequently received. At the time, the price of a dou of rice could reach as high as twelve thousand coins.	1213-7.20-8.17	1213
293	History of Song Dynasty (宋史)	The emperor personally performed rain prayers	嘉定六年五月，不雨，至于七月，江陵、德安、汉阳军旱。入年春，旱，首种不入。四月乙未，祷于太乙宫。	In the fifth month of the sixth year of the Jiading era, there was no rain until the seventh month, resulting in drought in Jiangling, De'an, and the Hanyang Army. The following spring, the drought persisted, and the first crops could not be sown. On the fifteenth day of the fourth month, prayers were offered at the Taiyi Palace.	1214.5.11	1214
294	History of Song Dynasty (宋史)	Officials were dispatched to perform rain prayers	嘉定七年四月庚子，命辅臣分祷郊丘、宗社。	On the Gengzi day in the fourth month of the seventh year of the Jiading era, the emperor ordered his ministers to conduct separate prayers at the suburban altars, imperial ancestral temple, and earth altar.	1214.5.16	1214
295	History of Song Dynasty (宋史)	The emperor personally performed rain prayers	嘉定七年五月康申，大雩于园丘，有事于岳、渎、海、至于八月乃雨。	On the day of Gengshen in the fifth month of the seventh year of the Jiading era, a grand rainmaking ceremony was held at the Circular Mound Altar, with rituals performed for the mountains, rivers, and seas. It was not until the eighth month that rain finally fell.	1214.6.10-7.8	1214
296	History of Song Dynasty (宋史)	Officials were dispatched to perform rain prayers	嘉定七年六月辛丑，以旱，命诸路州军祷雨。	On the sixth day of the sixth lunar month in the seventh year of the Jiading era, due to severe drought, an order was issued for all regional military prefectures to conduct prayers for rain.	1214.7.16	1214
297	History of Song Dynasty (宋史)	Officials were dispatched to perform rain prayers	嘉定八年三月乙亥，以旱，命诸路州县祷雨。	On the day Yihai in the third month of the eighth year of the Jiading era, due to drought, orders were given for prayers for rain in all prefectures and counties across the various circuits.	1215.4.16	1215
298	History of Song Dynasty (宋史)	The emperor personally performed rain prayers	嘉定八年四月乙未，幸太一宫、明庆寺祷雨。	On the Yimao day of the fourth month in the eighth year of the Jiading era, a visit was made to the Taiyi Palace and the Mingqing Temple to pray for rain.	1215.5.6	1215
299	History of Song Dynasty (宋史)	The emperor personally performed rain prayers	嘉定八年四月辛丑，避正殿，减膳。壬寅，祷雨于天地、宗庙、社稷。	On the day of Xinchou in the fourth month of the eighth year of the Jiading era, the emperor avoided the main hall and reduced his meals. On the following day, Renyin, prayers for rain were offered to heaven and earth, the ancestral temple, and the altars of soil and grain.	1215.5.13	1215
300	History of Song Dynasty (宋史)	Officials were dispatched to perform rain prayers	嘉定八年五月癸未，复命有司祷雨。	On the guiwei day in the fifth month of the eighth year of the Jiading era, officials were once again ordered to pray for rain.	1215.6.23	1215
301	History of Jin Dynasty (金史)	Officials were dispatched to perform rain prayers	贞祐四年六月癸卯，诏有司祈雨。	On the guimao day of the sixth month in the fourth year of the Zhenyou era, an edict was issued ordering the relevant officials to pray for rain.	1216.7.7	1216
302	History of Song Dynasty (宋史)	The emperor personally performed rain prayers	嘉定十年七月，不雨，帝日午曝立，祷于宫中。	On a July day in the tenth year of the Jiading era, when no rain had fallen, the emperor stood exposed under the midday sun, praying within the palace.	1217.8.4-9.2	1217
303	History of Jin Dynasty (金史)	Officials were dispatched to perform rain prayers	兴定二年六月丁巳，上以久旱，谕宰臣治京狱冤。癸亥，遣高汝砺、徒单思忠祷雨。	On the day of Dingsi in the sixth month of the second year of the Xingding era, the emperor, due to the prolonged drought, instructed his ministers to review and rectify unjust cases in the capital's prisons. On the day of Guihai, Gao Rulian and Tudan Sizhong were dispatched to pray for rain.	1218.7.17	1218
304	History of Jin Dynasty (金史)	Officials were dispatched to perform rain prayers	兴定二年七月甲戌，以旱灾，诏中外。己卯，遣官望祀岳镇海渎于北郊，享太庙，祭太社、太稷，祭九宫贵神于东郊，以祷雨。	On the day of Jiaxu in the seventh month of the second year of the Xingding era, an edict was issued both domestically and internationally due to the drought. On the day of Jimao, officials were dispatched to perform rituals at the northern suburbs to honor the mountains, towns, seas, and rivers, to offer sacrifices at the Imperial Ancestral Temple, to venerate the Grand Altar of the Land and the…	1218.8.2	1218
305	History of Jin Dynasty (金史)	The emperor personally performed rain prayers	兴定四年六月己卯，祈雨。	On the day Jimao in the sixth month of the fourth year of the Xingding era, prayers for rain were offered.	1220.7.22	1220
306	History of Jin Dynasty (金史)	The emperor personally performed rain prayers	兴定五年三月丙戌朔，上御仁安殿，祈雨，仍望祭于北郊。	On the first day of the third month in the fifth year of the Xingding era, the emperor presided at the Ren'an Hall to pray for rain and performed a distant worship ceremony at the northern suburbs.	1221.3.26	1221
307	History of Jin Dynasty (金史)	Officials were dispatched to perform rain prayers	兴定五年三月丙午，以旱筑坛祀雷雨师。	On the Bingwu day of the third month in the fifth year of the Xingding era, an altar was constructed to offer sacrifices to the deities of thunder and rain due to the drought.	1221.4.15	1221
308	History of Jin Dynasty (金史)	Officials were dispatched to perform rain prayers	兴定五年三月，以久旱，诏中外，仍命有司祈祷。	In March of the fifth year of the Xingding era, due to a prolonged drought, an imperial decree was issued to the capital and the provinces, and the relevant authorities were ordered to offer prayers.	1221.3.26-4.23	1221
309	History of Jin Dynasty (金史)	The emperor personally performed rain prayers	兴定五年四月辛酉，祷雨于太庙。	On the Xinyou day of the fourth month in the fifth year of the Xingding era, prayers for rain were offered at the Ancestral Temple.	1221.4.30	1221
310	History of Jin Dynasty (金史)	The emperor personally performed rain prayers	元光元年八月壬寅，祈雨。	On the Renyin day of the eighth month in the first year of Yuanguang, prayers for rain were offered.	1222.10.3	1222
311	History of Jin Dynasty (金史)	Officials were dispatched to perform rain prayers	武祯：正大初。时久旱祈祷不应，朝廷为忧，祯忽谓铉曰：「足下今日早归，恐为雨阻。」铉曰：「万里无云，赤日如此，安得有雨？」祯笑曰：「若是，则天不诚也。天何尝不诚。」既而东南有云气，须臾蔽天，平地雨注二尺，众皆惊叹。寻除司天台管勾。	Wu Zhen: In the early years of the Zhengda era, a prolonged drought persisted despite prayers for rain, causing great concern at court. Suddenly, Zhen said to Xuan, "You should return home early today, lest you be delayed by rain." Xuan replied, "The sky is clear for miles without a cloud, and the sun blazes so fiercely—how could there be rain?" Zhen smiled and said, "If that were true, then Heav…	1224	1224
312	History of Jin Dynasty (金史)	Officials were dispatched to perform rain prayers	正大三年三月，陜西旱。四月辛卯，亲享于太庙。辛丑，以旱，遣官祷于济渎。	In the third month of the third year of the Zhengda era, Shaanxi suffered a drought. On the Xinyou day of the fourth month, the emperor personally offered sacrifices at the ancestral temple. On the Xinchou day, due to the drought, officials were dispatched to pray at the Ji River.	1226.5.14	1226
313	History of Jin Dynasty (金史)	The emperor personally performed rain prayers	正大三年四月癸卯，祈于太庙。禁伞扇。河南大雨雹。	On the Guimao day of the fourth month in the third year of the Zhengda era, prayers were offered at the ancestral temple. The use of ceremonial umbrellas and fans was prohibited. Heavy hail fell in Henan.	1226.5.16	1226
314	History of Jin Dynasty (金史)	Officials were dispatched to perform rain prayers	正大五年八月乙卯，以旱，遣使祷于上清宫。	On the eighth month, Yimao day, the fifth year of Zhengda, an envoy was dispatched to offer prayers at the Shangqing Palace due to the drought.	1228.9.14	1228
315	History of Song Dynasty (宋史)	The emperor personally performed rain prayers	端平二年六月庚辰，流星昼陨。祈雨。	On the Gengchen day of the sixth month in the second year of the Duanping era, a meteor fell during daylight. Prayers for rain were offered.	1235.7.5	1235
316	History of Song Dynasty (宋史)	The emperor personally performed rain prayers	赵必愿：暂兼权户部侍郎，兼同详定敕令。请立国本，请亲祷雨。迁户部侍郎，暂兼给事中。	Zhao Biyuan: Temporarily appointed acting Vice Minister of Revenue, concurrently serving as co-editor of imperial decrees. Proposed the establishment of a crown prince and personally led prayer ceremonies for rain. Promoted to Vice Minister of Revenue while temporarily acting as Supervising Secretary.	1237	1237
317	History of Song Dynasty (宋史)	The emperor personally performed rain prayers	嘉熙元年六月甲辰，祈雨。	On the jiachen day of the sixth month in the first year of the Jiāxī era, prayers for rain were offered.	1237.7.18	1237
318	History of Song Dynasty (宋史)	The emperor personally performed rain prayers	杜范：迁权吏部侍郎兼侍讲。以久旱，复言：「陛下嗣膺宝位馀二十年，灾异谴告，无岁无之，至于今而益甚。陛下求所以应天者，将止于减膳彻乐、分祷群祀而已乎？抑当外此而反求诸躬乎？夫不务反躬悔过，而徒觊天怒之释，天下宁有是理？欲望陛下一洒旧习以新天下，出宫女以远声色，斥近习以防蔽欺，省浮费以给国用，薄徵敛以宽民力。且储贰未立，国本尚虚，乞选宗姓之贤者育之宫中而教导之。」	Du Fan was promoted to Vice Minister of Personnel and concurrently served as an Imperial Lecturer. Due to the prolonged drought, he further advised: "Your Majesty has inherited the throne for over twenty years, with warnings of disasters and anomalies occurring every single year, and now they have become even more severe. Is Your Majesty’s response to Heaven’s will limited only to reducing meals,…	1238	1238
319	History of Song Dynasty (宋史)	The emperor personally performed rain prayers	嘉熙三年夏四月壬寅，祈雨。	In the summer of the third year of the Jiāxī era, on the rén yín day of the fourth month, prayers for rain were offered.	1239.5.7	1239
320	History of Song Dynasty (宋史)	The emperor personally performed rain prayers	嘉熙四年六月乙未，祈雨。	On the sixth month, Yisi day, the fourth year of Jiāxī reign, prayers for rain were offered.	1240.6.23	1240
321	History of Song Dynasty (宋史)	The emperor personally performed rain prayers	淳祐元年秋七月壬辰，祈雨。	On the renchen day of the seventh month in autumn, the first year of the Chunyou era, prayers for rain were offered.	1241.8.14	1241
322	History of Song Dynasty (宋史)	The emperor personally performed rain prayers	淳祐四年二月乙未，祈雨。	On the second day of the second month in the fourth year of the Chunyou era, a prayer for rain was offered.	1244.4.3	1244
323	History of Song Dynasty (宋史)	The emperor personally performed rain prayers	淳祐四年秋七月己亥朔，祈雨。	On the first day of the seventh month in the autumn of the fourth year of the Chunyou era, prayers for rain were offered.	1244.8.5	1244
324	History of Song Dynasty (宋史)	The emperor personally performed rain prayers	淳祐五年六月甲申，祈雨。	On the jiashen day of the sixth month in the fifth year of the Chunyou era, prayers for rain were offered.	1245.7.16	1245
325	History of Song Dynasty (宋史)	The emperor personally performed rain prayers	淳祐五年七月甲辰：秋七月辛丑，镇江、常州亢旱，诏监司、守臣及沿江诸郡安集流民。甲辰，祈雨。	On the jiachen day of the seventh month in the fifth year of the Chunyou era: In the autumn, during the seventh month, on the xinwei day, Zhenjiang and Changzhou suffered from severe drought. An imperial decree was issued ordering the supervising officials, local administrators, and the counties along the river to assist and settle the displaced people. On the jiachen day, prayers for rain were c…	1245.8.5	1245
326	History of Song Dynasty (宋史)	The emperor personally performed rain prayers	淳祐六年六月丙午，祈雨。	On the afternoon of the sixth day of the sixth month in the sixth year of the Chunyou era, prayers were offered for rain.	1246.8.2	1246
327	History of Song Dynasty (宋史)	The emperor personally performed rain prayers	淳祐七年三月庚午，祈雨。	On the day Gengwu in the third month of the seventh year of the Chunyou era, prayers for rain were offered.	1247.4.23	1247
328	History of Song Dynasty (宋史)	The emperor personally performed rain prayers	淳祐七年五月甲寅，祈雨。	On the day of Jiayin in the fifth month of the seventh year of the Chunyou era, prayers were offered for rain.	1247.6.6	1247
329	History of Song Dynasty (宋史)	Officials were dispatched to perform rain prayers	淳佑七年六月大旱，命待从祷于天竺观音及霍山祠。	In June of the seventh year of the Chunyou era, a severe drought occurred. The emperor ordered his attendants to pray to Guanyin at Tianzhu Temple and at the Huoshan Shrine.	1247.7.4-.8.2	1247
330	History of Song Dynasty (宋史)	The emperor personally performed rain prayers	淳祐十二年五月甲申朔，祈雨。	On the first day of the fifth month in the twelfth year of the Chunyou era, prayers for rain were offered.	1252.6.9	1252
331	History of Song Dynasty (宋史)	The emperor personally performed rain prayers	宝祐元年六月庚申：六月戊申朔，江、湖、闽、广旱。庚申，以馀晦为司农卿、四川宣谕使。祈雨。	June 1st, Baoyou era: On the first day of the sixth month, droughts struck the regions of Jiangnan, Huguang, Fujian, and Guangdong. On June 13th, Yu Hui was appointed as Minister of Agriculture and Envoy to Sichuan. Prayers for rain were conducted.	1253.7.10	1253
332	History of Song Dynasty (宋史)	The emperor personally performed rain prayers	宝祐五年六月丁酉，祈雨。	On the day of Dingyou in the sixth month of the fifth year of the Baoyou era, prayers for rain were offered.	1257.7.26	1257
333	History of Song Dynasty (宋史)	The emperor personally performed rain prayers	宝祐五年秋七月丙辰，祈雨。	On the bingchen day in the seventh autumn month of the fifth year of the Baoyou era, prayers for rain were offered.	1257.8.14	1257
334	History of Song Dynasty (宋史)	The emperor personally performed rain prayers	宝祐六年三月辛亥朔，祈雨。	On the first day of the third month in the sixth year of the Baoyou era, a prayer for rain was offered.	1258.4.6	1258
335	Yuan History (元史)	Officials were dispatched to perform rain prayers	八思巴时，又有国师胆巴者，中统间，帝师八思巴荐之。时怀孟大旱，世祖命祷之，立雨。	During the time of Phagpa, there was another State Preceptor named Danba. In the Zhongtong era, Phagpa, the Imperial Preceptor, recommended him. At that time, Huaimeng was suffering from a severe drought, and Emperor Shizu ordered him to pray for rain, which immediately fell.	1260-1264	1260-1264
336	History of Song Dynasty (宋史)	The emperor personally performed rain prayers	景定元年五月甲申，祈雨。	On the day of Jiashen in the fifth month of the first year of the Jingding era, prayers were offered for rain.	1260.6.27	1260
337	History of Song Dynasty (宋史)	The emperor personally performed rain prayers	景定四年六月壬子，祈雨。	On the renzi day of the sixth month in the fourth year of the Jingding era, prayers for rain were offered.	1263.7.10	1263
338	Yuan History (元史)	Officials were dispatched to perform rain prayers	至元元年二月，东平、太原、平阳旱，分命西僧祷雨。	In the first month of the second lunar month of the Zhiyuan era, a drought struck Dongping, Taiyuan, and Pingyang. Western monks were separately dispatched to pray for rain.	1264.2	1264
339	Yuan History (元史)	Officials were dispatched to perform rain prayers	至元元年四月壬子，东平、太原、平阳旱，分遣西僧祈雨。	On the renzi day of the fourth month in the first year of the Zhiyuan era, a drought occurred in Dongping, Taiyuan, and Pingyang. Western monks were dispatched to these areas to pray for rain.	1264.4	1264
340	History of Song Dynasty (宋史)	The emperor personally performed rain prayers	景定五年六月戊午，祈雨。	On the afternoon of the sixth day of the sixth month in the fifth year of the Jingding era, prayers were offered for rain.	1264.7.10	1264
341	History of Song Dynasty (宋史)	The emperor personally performed rain prayers	景定五年七月丙申，祈雨。	On the day of Bingshen in the seventh month of the fifth year of the Jingding era, prayers for rain were offered.	1264.8.17	1264
342	History of Song Dynasty (宋史)	The emperor personally performed rain prayers	咸淳二年七月壬辰，祈雨，诏以来年正月一日郊。	On the day of Renchen in the seventh month of the second year of the Xianchun era, prayers for rain were offered, and an edict was issued to hold the suburban sacrifice on the first day of the first month of the following year.	1266.8.3	1266
343	History of Song Dynasty (宋史)	The emperor personally performed rain prayers	咸淳五年秋七月庚申，祈雨。	On the gengshen day of the seventh month in autumn of the fifth year of the Xianchun era, prayers for rain were offered.	1269.8.15	1269
344	Yuan History (元史)	Officials were dispatched to perform rain prayers	元贞九年五月丁未，诏诸王、驸马部属及各投下，凡市佣徭役与民均输。遣官调云南、四川、福建、两广官。大都旱，遣使持香祷雨。	In May of the ninth year of the Yuanzhen era, an imperial decree was issued stipulating that all princes, imperial sons-in-law, their subordinates, and various vassals must equally share the burdens of market labor and corvée duties with the common people. Officials were dispatched to transfer personnel from Yunnan, Sichuan, Fujian, and the two Guang regions. A drought struck Dadu, prompting the …	1293.6.26	1293
345	Yuan History (元史)	Officials were dispatched to perform rain prayers	元贞十年五月辛未，大都旱，遣使持香祷雨。	On the day of Xinwei in the fifth month of the tenth year of Yuanzhen, a severe drought struck Dadu. Envoys were dispatched to offer incense and pray for rain.	1296.6.12	1296
346	Yuan History (元史)	The emperor personally performed rain prayers+Officials were dispatched to perform rain prayers	皇庆二年三月丙辰以亢旱既久，帝于宫中焚香默祷，遣官分祷诸祠，甘雨大注。诏敦谕劝课农桑。	On the day of Bingchen in the third month of the second year of the Huangqing era, due to the prolonged severe drought, the emperor burned incense in silent prayer within the palace and dispatched officials to offer prayers at various shrines. Heavy rain poured down abundantly. An imperial decree was issued to emphasize and promote the importance of agriculture and sericulture.	1313.4.22	1313
347	Yuan History (元史)	Officials were dispatched to perform rain prayers	皇庆二年九月戊申京师大旱，帝问弭灾之道，翰林学士程钜夫举汤祷桑林事，帝奖谕之。	On the Wushen day of the ninth month in the second year of the Huangqing era, a severe drought struck the capital. The emperor inquired about methods to avert disasters, and the Hanlin Academician Cheng Jufu cited the story of King Tang’s prayer in the Mulberry Forest. The emperor praised and commended him.	1313.10.11	1313
348	Yuan History (元史)	The emperor personally performed rain prayers	延祐四年四月己亥，德安府旱，免屯田租。乙丑，禁岭北酒。常尝夜坐，谓侍臣曰：「雨旸不时，奈何？」萧拜住对曰：「宰相之过也。」帝曰：「卿不在中书耶？」拜住惶愧。顷之，帝露香默祷。既而大雨，左右以雨衣进，帝曰：「朕为民祈雨，何避焉！」	On the jihai day in the fourth month of the fourth year of the Yanyou era, a drought occurred in De'an Prefecture, and the government exempted the rent from the military farms. On the yichou day, alcohol was banned in Lingbei. The Emperor often sat at night and once said to his attendants, "Why is the rain and sunshine not timely?" Xiao Baizhu replied, "It is the fault of the prime ministers." Th…	1317.6.9	1317
349	Yuan History (元史)	Officials were dispatched to perform rain prayers	延祐七年五月己丑，中书省臣请禁擅奏除拜，帝曰：「然恐朕遗忘，或乘间奏请，滥赐名爵，汝等当复以闻。」复置称海、五条河屯田。命僧祷雨。	On the jichou day in the fifth month of the seventh year of the Yanyou era, the ministers of the Central Secretariat requested a prohibition on unauthorized memorials seeking appointments. The Emperor said, "However, I fear I may forget, or that some might take the opportunity to submit requests, leading to excessive bestowal of titles and ranks. You should report such matters to me again." The a…	1320.6.17	1320
350	Yuan History (元史)	Officials were dispatched to perform rain prayers	天历二年，关中大旱，饥民相食，特拜陕西行台中丞。道经华山，祷雨于岳祠，泣拜不能起，天忽阴翳，一雨二日。及到官，复祷于社坛，大雨如注，水三尺乃止，禾黍自生，秦人大喜。	In the second year of the Tianli era, a severe drought struck the Guanzhong region, leading to such dire famine that people resorted to cannibalism. He was specially appointed as the Vice Censor-in-Chief of Shaanxi. Passing by Mount Hua on his journey, he prayed for rain at the temple of the mountain deity. Kneeling in tears, he remained prostrate until the sky suddenly darkened, and rain fell fo…	1329	1329
351	Yuan History (元史)	Officials were dispatched to perform rain prayers	天历二年三月壬申，以去冬无雪，今春不雨，命中书及百司官分祷山川群祀。	On the renchen day of the third month in the second year of the Tianli era, due to the lack of snow the previous winter and no rain this spring, the Zhongshu Sheng and all government offices were ordered to pray to the mountains, rivers, and various deities.	1329.4.14	1329
352	Yuan History (元史)	Officials were dispatched to perform rain prayers	天历二年夏四月戊戌，以陜西久旱，遣使祷西岳、西镇诸祠。	In the summer, the fourth month, on the day of Wuxu, in the second year of the Tianli era, due to the prolonged drought in Shaanxi, envoys were dispatched to offer prayers at the temples of the Western Peak and the Western Mountain.	1329.5.10	1329
353	Yuan History (元史)	Officials were dispatched to perform rain prayers	王思诚：至正二年，拜监察御史，上疏言：「京畿去年秋不雨，冬无雪，方春首月蝗生，黄河水溢。盖不雨者，阳之亢，水涌者，阴之盛也。尝闻一妇衔冤，三年大旱，往岁伯颜专擅威福，仇杀不辜，郯王之狱，燕铁木儿宗党死者，不可胜数，非直一妇之冤而已，岂不感伤和气邪！宜雪其罪。敕有司行祷百神，陈牲币，祭河伯，发卒塞其缺，被灾之家，死者给葬具，庶几可以召阴阳之和，消水旱之变，此应天以实不以文也。」	Wang Sicheng: In the second year of the Zhizheng era (1342), he was appointed as a Censor and submitted a memorial stating: "Last autumn, the capital region experienced no rain; in winter, there was no snow; at the beginning of spring this year, locusts emerged, and the Yellow River overflowed. The lack of rain signifies an excess of yang, while the flooding indicates an overabundance of yin. It …	1342	1342
354	Yuan History (元史)	Officials were dispatched to perform rain prayers	刘秉直：天不雨，禾且槁，秉直诣城北太行之苍峪神祠，具词祈祝，有青蛇蜿蜒而出，观者异之。辞神而还，行及数里，雷雨大至。	Liu Bingzhi: As there was no rain and the crops were about to wither, Bingzhi went to the Cangyu Shrine of the Taihang Mountains north of the city, where he offered prayers and invocations. A green snake slithered out, astonishing the onlookers. After bidding farewell to the deity and on his way back, when he had traveled several li, a great thunderstorm arrived.	1348	1348
355	History of the Ming Dynasty (明史)	The emperor personally performed rain prayers	洪武二年，太祖以春久不雨，祈告诸神祇。	In the second year of the Hongwu era, Emperor Taizu prayed to various deities for rain due to the prolonged spring drought.	1369	1369
356	History of the Ming Dynasty (明史)	The emperor personally performed rain prayers	洪武三年五月。是月旱，斋戒，后妃亲执爨，皇太子诸王馈于斋所。六月戊午朔，素服草屦，步祷山川坛，露宿凡三日，还斋于西庑。辛酉，赉将士，省狱囚，命有司访求通经术明治道者。壬戌，大雨。/洪武三年夏，旱。六月朔，帝素服草履，步祷于山川坛。/洪武三年，夏旱。六月戊午朔，步祷郊坛。	In May of the third year of Hongwu. That month, a drought occurred. The emperor observed a fast, with the empress and consorts personally tending the cooking fires, while the crown prince and other princes delivered meals to the fasting quarters. On the first day of the sixth month (Wuwu), dressed in plain garments and straw sandals, he walked to pray at the Altar of Mountains and Rivers, spendin…	1370.6.24	1370
357	History of the Ming Dynasty (明史)	Imperial clan members personally performed rain prayers	洪武皇后：遇岁旱，辄率宫人蔬食，助祈祷；岁凶，则设麦饭野羹。帝或告以振恤。后曰：「振恤不如蓄积之先备也。」	Empress Hongwu would observe a vegetarian diet with her palace attendants during droughts to aid in prayer rituals for rain; in times of poor harvest, she provided simple meals of wheat and wild vegetables. When the Emperor mentioned relief efforts, she responded, "Relief distributions cannot compare to having stored provisions prepared in advance."	1368-1403	1368-1403
358	History of the Ming Dynasty (明史)	The emperor personally performed rain prayers	大小青龙神者，记云：「有僧名卢，寓西山。有二童子来侍。时久旱，童子入潭化二青龙，遂得雨。后赐卢号曰感应禅师，建寺设像，别设龙祠于潭上。宣德中，建大圆通寺，加二龙封号，春秋祭之。」迩者连旱，祈祷无应，不足崇奉明矣。	The Great and Small Azure Dragon Deities are recorded as follows: "A monk named Lu resided in the Western Hills. Two youths came to serve him. During a prolonged drought, the youths entered a pool and transformed into two azure dragons, bringing rain. Later, the emperor granted Lu the title of Responsive Chan Master, built a temple with statues, and separately established a dragon shrine above th…	1398-1435（1426-1436）	1428
359	History of the Ming Dynasty (明史)	The emperor personally performed rain prayers	宣德八年六月乙酉，祷雨不应，作《闵旱诗》示群臣。	On the day of Yiyou in the sixth month of the eighth year of the Xuande reign, prayers for rain went unanswered, prompting the emperor to compose the "Poem of Lament for the Drought" to present to his ministers.	1433.6.20	1433
360	History of the Ming Dynasty (明史)	The emperor personally performed rain prayers	周叙：正统八年夏又上言：「比天旱，陛下责躬虔祷，而臣下不闻效忠补过之言，徒陈情乞用而已。掌铨选者罔论贤否，第循资格。司国计者不问耕桑，惟勤赋敛。军士困役作，刑罚失重轻，风宪无激扬，言官务缄默。僧道数万，日耗户口，流民众多，莫为矜恤。」	Zhou Xu submitted another memorial in the summer of the eighth year of Zhengtong: "During the recent drought, Your Majesty blamed himself and prayed devoutly, yet none of your subjects were heard offering loyal words to rectify errors, merely presenting personal appeals for appointments. Those in charge of official selections make no distinction between the worthy and the unworthy, only following…	1443	1443
361	History of the Ming Dynasty (明史)	Officials were dispatched to perform rain prayers	正统九年三月，雨雪愆期，遣官祭天地、社稷、太岁、风云雷雨、岳镇海渎。	In the ninth year of the Zhengtong era, during the third month, prolonged rain and snow disrupted the seasonal patterns. Officials were dispatched to offer sacrifices to Heaven and Earth, the Gods of Soil and Grain, the Year Deity, the Deities of Wind, Clouds, Thunder, and Rain, as well as the Deities of the Sacred Mountains, Great Peaks, Seas, and Rivers.	1444.3.20-1444.4.17	1444
362	History of the Ming Dynasty (明史)	The emperor personally performed rain prayers	景泰六年五月己巳，祷雨于南郊。	On the day of Jisi in the fifth month of the sixth year of the Jingtai reign, prayers for rain were offered in the southern suburbs.	1455.6.9	1455
363	History of the Ming Dynasty (明史)	Officials were dispatched to perform rain prayers	成化六年二月壬申，以自冬徂春，雨雪不降，敕谕群臣亲诣山川坛请祷。	On the Renwu day in the second month of the sixth year of the Chenghua era, as no rain or snow had fallen from winter through spring, an imperial edict was issued commanding officials to personally proceed to the Altar of Mountains and Rivers to offer prayers.	1470.3.25	1470
364	History of the Ming Dynasty (明史)	The emperor personally performed rain prayers	成化六年二月丁丑，祷雨于郊坛。	On the Dingchou day in the second month of the sixth year of the Chenghua era, prayers for rain were offered at the suburban altar.	1470.3.30	1470
365	History of the Ming Dynasty (明史)	Officials were dispatched to perform rain prayers	成化八年四月，京师久旱，运河水涸。癸酉，遣使祷于郊社、山川、淮渎、东海之神。乙酉，录囚。丁亥，遣使录天下囚。	In the eighth year of the Chenghua reign, April, the capital experienced a prolonged drought, and the Grand Canal dried up. On the Guiyou day, envoys were dispatched to offer prayers to the deities of the suburban altars, mountains, rivers, the Huai River, and the East Sea. On the Yiyou day, a review of prisoners was conducted. On the Dinghai day, envoys were sent to review prisoners throughout t…	1472.5.14	1472
366	History of the Ming Dynasty (明史)	Officials were dispatched to perform rain prayers	盛颙：成化十七年召为刑部右侍郎。居二年，山东旱饥，盗起，改顒左副都御史往巡抚。顒至露祷，大雨沾溉，稿禾复苏。	Sheng Yong: In the seventeenth year of the Chenghua era, he was summoned to serve as the Right Vice Minister of Justice. After two years, a drought and famine struck Shandong, leading to outbreaks of banditry. He was then reassigned as the Left Vice Censor-in-Chief and dispatched to oversee the region. Upon his arrival, he prayed openly for rain, which resulted in heavy showers that thoroughly ir…	1482-1483	1482
367	History of the Ming Dynasty (明史)	Officials were dispatched to perform rain prayers	成化二十三年五月乙卯，旱，遣使分祷天下山川。丙辰，敕群臣修省。	On the day of Yimao in the fifth month of the twenty-third year of the Chenghua reign, a drought occurred, prompting the dispatch of envoys to offer prayers at mountains and rivers across the land. On the following day, Bingchen, officials were commanded to engage in self-reflection and corrective actions.	1487.6.7	1487
368	History of the Ming Dynasty (明史)	Officials were dispatched to perform rain prayers	刘吉：弘治二年二月旱，帝令儒臣撰文祷雨。	Liu Ji: In the second month of the second year of the Hongzhi reign, a drought occurred, and the emperor ordered Confucian scholars to compose prayers for rain.	1489.3.2-1489.3.31	1489
369	History of the Ming Dynasty (明史)	Officials were dispatched to perform rain prayers	弘治十七年，畿内、山东久旱，命官祭告天寿山，分命各巡抚祭告北岳、北镇、东岳、东镇、东海。	In the seventeenth year of the Hongzhi era, the capital region and Shandong suffered from a prolonged drought. Officials were dispatched to offer sacrifices at Tianshou Mountain, while various grand coordinators were separately assigned to perform rituals at the Northern Peak, Northern Zhen, Eastern Peak, Eastern Zhen, and the Eastern Sea.	1504.1.17-1505.2.3	1504
370	History of the Ming Dynasty (明史)	The emperor personally performed rain prayers	正德五年正月丁卯，大祀天地于南郊。三月辛未，祷雨，释狱囚，免正德三年逋赋。	On the day of Dingmao in the first month of the fifth year of Zhengde, a grand sacrifice to heaven and earth was held at the southern suburbs. On the day of Xinwei in the third month, prayers for rain were offered, prisoners were released, and overdue taxes from the third year of Zhengde were exempted.	1510.2.18	1510
371	History of the Ming Dynasty (明史)	Officials were dispatched to perform rain prayers	邵元节：嘉靖三年，徵元节入京，见于便殿，大加宠信，俾居显灵宫，专司祷祀。雨雪愆期，祷有验，封为清微妙济守静修真凝玄衍范志默秉诚致一真人，统辖朝天、显灵、灵济三宫，总领道教，锡金、玉、银、象牙印各一。	Shao Yuanjie: In the third year of the Jiajing reign (1524), Yuanjie was summoned to the capital and received in the informal hall. He was greatly favored and trusted by the emperor, who granted him residence at the Xianling Palace and put him in charge of prayers and sacrifices. When rain or snow was delayed, his prayers proved effective. He was granted the title "Perfected of Purity, Subtlety, …	1524-1525	1524
372	History of the Ming Dynasty (明史)	The emperor personally performed rain prayers	嘉靖八年，春祈雨，冬祈雪，皆御制祝文，躬祀南郊及山川坛。	In the eighth year of the Jiajing reign, spring prayers for rain and winter prayers for snow were conducted, with the emperor composing the ceremonial prayers himself and personally presiding over sacrifices at the Southern Suburban Altar and the Altar of Mountains and Rivers.	1529	1529
373	History of the Ming Dynasty (明史)	The emperor personally performed rain prayers	嘉靖八年二月乙酉，祷于社稷。	On the day of Yiyou in the second month of the eighth year of the Jiajing era, prayers were offered to the gods of soil and grain.	1529.3.28	1529
374	History of the Ming Dynasty (明史)	The emperor personally performed rain prayers	嘉靖十七年四月甲子，祷雨于郊坛。戊辰，雨。九月戊寅，免畿内被灾税粮。	On the day of Jiasi in the fourth month of the seventeenth year of the Jiajing reign, prayers for rain were offered at the suburban altar. On the day of Wuchen, rain fell. On the day of Wuyin in the ninth month, tax grain from the disaster-stricken capital region was exempted.	1538.5.19	1538
375	History of the Ming Dynasty (明史)	The emperor personally performed rain prayers	嘉靖二十年三月，久旱，亲祷。	In March of the twentieth year of the Jiajing reign, there was a prolonged drought, and the emperor personally offered prayers.	1541.3.27-1541.4.25	1541
376	History of the Ming Dynasty (明史)	The emperor personally performed rain prayers	嘉靖四十五年六月丙子，旱，亲祷雨于凝道雷轩，越三日雨，群臣表贺。	On the day of Bingzi in the sixth month of the forty-fifth year of the Jiajing reign, a drought occurred. The emperor personally prayed for rain at the Ningdao Thunder Pavilion. After three days, rain fell, and all ministers submitted memorials to congratulate him.	1566.7.3	1566
377	History of the Ming Dynasty (明史)	Officials were dispatched to perform rain prayers	万历十三年二月丁未，京师自去年八月不雨，至于是月。庚午，大雩。	On the dingwei day in the second month of the thirteenth year of the Wanli era, the capital had seen no rain since the eighth month of the previous year until this month. On the gengwu day, a grand rain-making ceremony was held.	1585.3.6	1585
378	History of the Ming Dynasty (明史)	Officials were dispatched to perform rain prayers	万历十三年三月甲申，大雩。	On the day of Jiashen in the third month of the thirteenth year of the Wanli era, a great rainmaking ceremony was held.	1585.4.12	1585
379	History of the Ming Dynasty (明史)	Officials were dispatched to perform rain prayers	万历十三年四月丙午，大雩。	On the bingwu day of the fourth month in the thirteenth year of the Wanli era, a grand rainmaking ceremony was held.	1585.5.4	1585
380	History of the Ming Dynasty (明史)	The emperor personally performed rain prayers	万历十三年四月戊午，步祷于南郊，面谕大学士等曰：「天旱虽由朕不德，亦天下有司贪婪，剥害小民，以致上干天和，今后宜慎选有司。」蠲天下被灾田租一年。/万历十三年四月戊午，因久旱，步祷郊坛。京师自去秋至此不雨，河井并涸。	On the wu-wu day of the fourth month in the thirteenth year of the Wanli era, the emperor walked in prayer to the southern suburbs, where he personally instructed the Grand Secretaries, saying: "Although this drought arises from my lack of virtue, it is also due to the corruption of officials throughout the land, who exploit and harm the common people, thereby offending the harmony of Heaven. Hen…	1585.5.16	1585
381	History of the Ming Dynasty (明史)	Officials were dispatched to perform rain prayers	万历十四年三月乙巳，以久旱，命顺天府祈祷。	On the day of Yisi in the third month of the fourteenth year of the Wanli era, due to a prolonged drought, the Shuntian Prefecture was ordered to conduct prayers.	1586.4.28	1586
382	History of the Ming Dynasty (明史)	The emperor personally performed rain prayers+Officials were dispatched to perform rain prayers	沈鲤：帝忧旱，步祷郊坛，议分遣大臣祷天下名山大川。鲤言使臣往来驿骚，恐重困民，请刘斋三日，以告文授太常属致之，罢寺观勿祷，帝多可其奏。	Shen Li: The emperor, concerned about the drought, walked in prayer to the suburban altar and proposed sending ministers to pray at famous mountains and rivers across the land. Shen Li argued that the comings and goings of envoys would disturb the postal stations and likely further burden the people. He requested that the emperor fast for three days, have the prayer text prepared by officials of …	1588	1588
383	History of the Ming Dynasty (明史)	The emperor personally performed rain prayers	蒋允仪：天启二年，擢御史。因言：「近言官稍进苦口，辄见龃龉，迁谪未已，申之戒谕。使诸臣不遵明谕，而引裾折槛以甘斥逐，天下事犹可为也；使诸臣果遵明谕，而箝口结舌以保禄位，天下事尚忍言哉！顷者恒旸不雨，二麦无秋，皇上于宫中祈祷，反得冰雹之灾。变不虚生，各以类应。夫以坤维之厚重而震撼于妖孽，以胡眉之丈夫而交关于妇寺，以籍丛炀灶之奸而托之奉公洁己，是皆阴胁阳之徵也。」	Jiang Yunyi: In the second year of the Tianqi era, he was promoted to censor. He remarked: "Recently, when censors offered some earnest admonishments, they immediately encountered conflict. Before the demotions and exiles ceased, further warnings were issued. If the officials do not heed the clear edicts but instead pull on robes and break railings, willingly accepting dismissal and exile, then t…	1622	1622
384	History of the Ming Dynasty (明史)	The emperor personally performed rain prayers	崇祯元年五月辛巳，祷雨。	On the xinwei day of the fifth month in the first year of the Chongzhen reign, prayers were offered for rain.	1628.6.22	1628
385	History of the Ming Dynasty (明史)	The emperor personally performed rain prayers	崇祯三年三月，旱，择日亲祷。	In March of the third year of the Chongzhen reign, a drought occurred, and an auspicious day was chosen for the emperor to personally offer prayers.	1630.4.13-1630.5.11	1630
386	History of the Ming Dynasty (明史)	Officials were dispatched to perform rain prayers	刘宗周：以时方祷雨，而宗周称疾，指为偃蹇，激帝怒，拟旨诘之。且令陈足兵、足饷之策，宗周条画以对，延儒、体仁不能难。	Liu Zongzhou: As prayers for rain were being conducted at the time, Liu Zongzhou pleaded illness, which was interpreted as arrogance, provoking the emperor's anger. An edict was drafted to reprimand him and demand strategies for sufficient troops and provisions. Liu Zongzhou presented a detailed plan, which neither Yan Ru nor Ti Ren could refute.	1630	1630
387	History of the Ming Dynasty (明史)	The emperor personally performed rain prayers	崇祯四年四月庚戌，祷雨。	On the Gengxu day of the fourth month in the fourth year of the Chongzhen era, prayers were offered for rain.	1631.5.7	1631
388	History of the Ming Dynasty (明史)	The emperor personally performed rain prayers	崇祯十三年二月戊寅，以久旱求直言。三月甲申，祷雨。	On the day of Wuyin in the second month of the thirteenth year of the Chongzhen reign, the emperor sought frank advice due to a prolonged drought. On the day of Jiashen in the third month, prayers for rain were offered.	1640.4.23	1640
389	History of the Ming Dynasty (明史)	The emperor personally performed rain prayers	崇祯十四年二月己酉，诏以时事多艰，灾异叠见，痛自刻责，停今岁行刑，诸犯俱减等论。三月乙酉，祷雨。	On the fourteenth day of the second month in the fourteenth year of the Chongzhen reign, an edict was issued acknowledging the numerous difficulties and repeated natural disasters, expressing deep self-reproach. It ordered the suspension of executions for the year and reduced the sentences of all prisoners by one degree. On the twenty-second day of the third month, prayers for rain were conducted.	1641.4.19	1641
390	History of the Ming Dynasty (明史)	The emperor personally performed rain prayers	崇祯十六年五月辛丑，祈祷雨泽，命臣工痛加修省。	On the Xinyou day of the fifth month in the sixteenth year of the Chongzhen reign, prayers were offered for rain, and officials were ordered to engage in deep reflection and self-rectification.	1643.6.24	1643
391	History of the Qing Dynasty (清史稿)	The emperor personally performed rain prayers	顺治十四年夏旱，世祖始祷雨圜丘，前期斋三日，冠服浅色，禁屠宰，罢刑名。	In the summer of the fourteenth year of the Shunzhi reign, a drought occurred. Emperor Shizu initiated prayers for rain at the Circular Mound Altar. Preparations included a three-day fast beforehand, wearing light-colored ceremonial robes, prohibiting animal slaughter, and suspending judicial punishments.	1657.2.13-1658.2.1	1657
392	History of the Qing Dynasty (清史稿)	The emperor personally performed rain prayers	上以祷雨步至南郊斋宿。	The emperor went to the southern suburbs to fast and stay overnight in order to pray for rain.	1660.7.19	1660
393	History of the Qing Dynasty (清史稿)	Officials were dispatched to perform rain prayers	康熙九年夏旱，诏百官修省，礼部祈雨。	In the summer of the ninth year of the Kangxi reign, a drought prompted an imperial decree ordering all officials to engage in self-reflection and repentance, while the Ministry of Rites conducted prayers for rain.	1670.1.21-1671.2.8	1670
394	History of the Qing Dynasty (清史稿)	The emperor personally performed rain prayers	康熙九年夏旱，诏百官修省，礼部祈雨。明年，帝亲祷。	In the summer of the ninth year of the Kangxi reign, a drought occurred, prompting the emperor to issue an edict ordering all officials to engage in self-reflection and repentance. The Ministry of Rites conducted prayers for rain. The following year, the emperor personally offered prayers.	1671.2.9-1672.1.29	1671
395	History of the Qing Dynasty (清史稿)	Officials were dispatched to perform rain prayers	又言：“今岁雨泽愆期，方事祈祷。近因直隶多盗，廷议於玉田、滦州、霸州、雄县增设驻防旗兵，构建营房，劳民动众，应暂停止。俟农隙时酌行。”	He further stated: "This year's rainfall has been delayed beyond the proper season, and we are currently engaged in prayers for rain. Recently, due to the increased banditry in Zhili, the court proposed to station additional banner troops in Yutian, Luanzhou, Bazhou, and Xiongxian, constructing barracks which would burden the people and mobilize the masses. This should be temporarily halted and c…	1673.2.17-1674.2.5	1673
396	History of the Qing Dynasty (清史稿)	The emperor personally performed rain prayers	上以盛夏亢旱，步祷於天坛。	The emperor, due to the severe drought in midsummer, walked to the Altar of Heaven to pray.	1678.8.5	1678
397	History of the Qing Dynasty (清史稿)	The emperor personally performed rain prayers	旱甚，上步祷於天坛。	The drought was severe, and the emperor walked to the Temple of Heaven to pray.	1679.5.24	1679
398	History of the Qing Dynasty (清史稿)	The emperor personally performed rain prayers	上祈雨天坛，翌日，雨。	He prayed for rain at the Temple of Heaven, and it rained the next day.	1680.5.15	1680
399	History of the Qing Dynasty (清史稿)	The emperor personally performed rain prayers	诏曰：“今兹仲夏，久旱多风，阴阳不调，灾孰大焉。用是减膳撤乐，斋居默祷。虽降甘霖，尚未霑足。皆朕之凉德，不能上格天心。政令有不便於民者更之。罪非常赦不原者咸赦除之。”	"An edict proclaims: 'In this midsummer season, prolonged drought and persistent winds prevail, disrupting the balance between yin and yang—what calamity could be greater? Thus, We reduce Our meals, suspend musical entertainments, and dwell in abstinence with silent prayers. Though timely rain has descended, it remains insufficient to nourish the earth. All these stem from Our lack of virtue, fai…	1687.6.12	1687
400	History of the Qing Dynasty (清史稿)	The emperor personally performed rain prayers	二十六年，亲制祝文祈告，雨立降。又尝设坛宫禁，跽祷三昼夜，日惟淡食，越四日，步祷天坛，雨骤澍，步还宫，衣履霑湿云。	In the twenty-sixth year of his reign, he personally composed a prayer for rain, which was immediately answered with a downpour. On another occasion, he established an altar within the palace grounds, kneeling in prayer for three days and nights, consuming only plain food. After four days, he walked in prayer to the Temple of Heaven, where heavy rain suddenly poured down. He then walked back to t…	1687.2.12-1688.2.1	1687
401	History of the Qing Dynasty (清史稿)	Officials were dispatched to perform rain prayers	命礼部祈雨。	Order the Ministry of Rites to pray for rain.	1711.5.17-1711.6.15	1711
402	History of the Qing Dynasty (清史稿)	Officials were dispatched to perform rain prayers	发京仓米二十万石赈顺天、永平。五城粥厂展期至秋。命礼部祈雨。	200,000 dan of rice from the capital granaries were distributed to relieve famine in Shuntian and Yongping. The porridge kitchens in the five districts extended their operations until autumn. The Ministry of Rites was ordered to pray for rain.	1716.5.13	1716
403	History of the Qing Dynasty (清史稿)	The emperor personally performed rain prayers+Officials were dispatched to perform rain prayers	上驻热河，斋居祈雨。/五十五年，上幸热河，嵩祝从。久不雨，上忧旱甚，遣嵩祝还京师，察诸大臣祈雨不躬至者劾奏。	The emperor resided in Rehe, observing a fast and praying for rain. In the fifty-fifth year, the emperor visited Rehe, and Songzhu accompanied him. As the drought persisted with no rain, the emperor grew deeply concerned. He dispatched Songzhu back to the capital to investigate and impeach any ministers who failed to personally attend the rain-praying ceremonies.	1716.6.20	1716
404	History of the Qing Dynasty (清史稿)	The emperor personally performed rain prayers	上祈雨於黑龙潭	Praying for rain at the Black Dragon Pool	1724.3.20	1724
405	History of the Qing Dynasty (清史稿)	The emperor personally performed rain prayers	上祈雨，是日，雨。	A prayer for rain was offered, and on that very day, it rained.	1731.7.26	1731
406	History of the Qing Dynasty (清史稿)	The emperor personally performed rain prayers	上诣黑龙潭祈雨。	The emperor went to the Black Dragon Pool to pray for rain.	1738.5.3	1738
407	History of the Qing Dynasty (清史稿)	The emperor personally performed rain prayers	上诣黑龙潭祈雨。	The emperor went to the Black Dragon Pool to pray for rain.	1740.6.8	1740
408	History of the Qing Dynasty (清史稿)	The emperor personally performed rain prayers	上诣黑龙潭祈雨。	The Emperor proceeded to the Black Dragon Pool to pray for rain.	1742.5.3	1742
409	History of the Qing Dynasty (清史稿)	The emperor personally performed rain prayers	上诣圜丘行大雩礼，特诏贬损仪节，以示虔祷。	The emperor proceeded to the Circular Mound to perform the Great Rain Sacrifice, issuing a special decree to reduce the ceremonial protocols as a demonstration of devout prayer.	1744.5.19	1744
410	History of the Qing Dynasty (清史稿)	Imperial clan members personally performed rain prayers	谕曰：“一春以来，雨泽稀少。皇太后以天时久旱，忧形於色，今日从寝宫步行至园内龙神庙虔祷。朕惶恐战栗，即刻前往请安，谆恳谢罪，特谕内外臣工知之。	The Emperor declared: "Since the beginning of spring, rainfall has been scarce. The Empress Dowager, deeply troubled by the prolonged drought, has been visibly worried. Today, she walked from her residence to the Dragon God Temple in the garden to offer devout prayers. I, filled with trepidation and awe, immediately went to pay my respects, earnestly seeking forgiveness for my shortcomings. This …	1744.5.23	1744
411	History of the Qing Dynasty (清史稿)	The emperor personally performed rain prayers	上诣黑龙潭祈雨。	The Emperor visited the Black Dragon Pool to pray for rain.	1745.7.21	1745
412	History of the Qing Dynasty (清史稿)	The emperor personally performed rain prayers	上诣黑龙潭祈雨。	The emperor went to the Black Dragon Pool to pray for rain.	1747.6.27	1747
413	History of the Qing Dynasty (清史稿)	The emperor personally performed rain prayers	上至黑龙潭祈雨。	They went to Black Dragon Pool to pray for rain.	1749.6.28	1749
414	History of the Qing Dynasty (清史稿)	The emperor personally performed rain prayers	上诣黑龙潭祈雨。	The emperor went to the Black Dragon Pool to pray for rain.	1750.6.12	1750
415	History of the Qing Dynasty (清史稿)	The emperor personally performed rain prayers	上诣黑龙潭祈雨。	The emperor went to the Black Dragon Pool to pray for rain.	1750.7.2	1750
416	History of the Qing Dynasty (清史稿)	Imperial clan members were dispatched to perform rain prayers	十六年夏四月丙戌，上驻跸泰安府，祀东岳。己丑，遣履亲王允祹代行常雩礼。	In the summer of the sixteenth year, on the bingxu day of the fourth month, the Emperor resided at Tai'an Prefecture and performed sacrifices to the Eastern Peak. On the jichou day, Prince Lü Yuntong was dispatched to conduct the ritual of the seasonal rain prayer on his behalf.	1751	1751
417	History of the Qing Dynasty (清史稿)	The emperor personally performed rain prayers	上诣黑龙潭祈雨。	The Emperor went to the Black Dragon Pool to pray for rain.	1753.5.24	1753
418	History of the Qing Dynasty (清史稿)	The emperor personally performed rain prayers	上诣黑龙潭祈雨。	The emperor went to the Black Dragon Pool to pray for rain.	1756.6.10	1756
419	History of the Qing Dynasty (清史稿)	The emperor personally performed rain prayers	上诣黑龙潭祈雨。	The emperor went to the Black Dragon Pool to pray for rain.	1758.5.31	1758
420	History of the Qing Dynasty (清史稿)	The emperor personally performed rain prayers	丁巳，常雩，祀天於圜丘。上以农田望泽，命停止卤簿，步行虔祷。	On the Ding Si day, the regular Yu sacrifice was performed to Heaven at the Circular Mound. As the emperor was concerned about the farmland's need for rain, he ordered the procession to be halted and proceeded on foot to offer sincere prayers.	1759.5.3	1759
421	History of the Qing Dynasty (清史稿)	The emperor personally performed rain prayers	上诣黑龙潭祈雨。	The emperor went to the Black Dragon Pool to pray for rain.	1759.6.6	1759
422	History of the Qing Dynasty (清史稿)	The emperor personally performed rain prayers	上素服诣社稷坛祈雨。	He dressed in plain white and went to the Altar of Land and Grain to pray for rain.	1759.6.16	1759
423	History of the Qing Dynasty (清史稿)	The emperor personally performed rain prayers	二十四年六月庚戌，缓常犯奏请处决。戊午，赈陕西榆林等十一州县旱灾。庚申，上以久旱，步至圜丘行大雩礼。是日，大雨。	On the gengxu day in the sixth month of the twenty-fourth year, executions for habitual offenders were temporarily suspended upon petition. On the wuwu day, relief was provided for the drought in eleven prefectures and counties including Yulin in Shaanxi. On the gengshen day, due to the prolonged drought, the emperor walked to the Circular Mound Altar to perform the Dayu ritual. That same day, he…	1759	1759
424	History of the Qing Dynasty (清史稿)	The emperor personally performed rain prayers	上诣黑龙潭祈雨。	The emperor went to the Black Dragon Pool to pray for rain.	1763.5.28	1763
425	History of the Qing Dynasty (清史稿)	The emperor personally performed rain prayers	上诣黑龙潭祈雨。	The emperor went to the Black Dragon Pool to pray for rain.	1766.6.12	1766
426	History of the Qing Dynasty (清史稿)	The emperor personally performed rain prayers	上诣黑龙潭祈雨。	The emperor went to the Black Dragon Pool to pray for rain.	1766.6.24	1766
427	History of the Qing Dynasty (清史稿)	The emperor personally performed rain prayers	上诣黑龙潭祈雨。	The emperor went to the Black Dragon Pool to pray for rain.	1767.5.13	1767
428	History of the Qing Dynasty (清史稿)	The emperor personally performed rain prayers	乾隆三十四年，会天旱祷雨，谕曰：“玉以芘荫嘉穀，俾免水旱偏灾，特敕所司用玉将事。”自此为恒式。	In the thirty-fourth year of the Qianlong reign, during a drought when prayers for rain were offered, an edict stated: "Jade serves to protect the bountiful grains, ensuring avoidance of partial disasters from flood and drought. We specifically command the responsible officials to use jade in conducting the ceremonies." From then on, this became a permanent practice.	1769.2.7-1770.1.26	1769
429	History of the Qing Dynasty (清史稿)	The emperor personally performed rain prayers	上诣黑龙潭祈雨。	The emperor went to the Black Dragon Pool to pray for rain.	1770.3.27-1770.4.25	1770
430	History of the Qing Dynasty (清史稿)	The emperor personally performed rain prayers	上诣黑龙潭祈雨。	The emperor visited the Black Dragon Pool to pray for rain.	1771.5.29	1771
431	History of the Qing Dynasty (清史稿)	The emperor personally performed rain prayers	上诣黑龙潭祈雨。	The emperor went to the Black Dragon Pool to pray for rain.	1777.7.29	1777
432	History of the Qing Dynasty (清史稿)	The emperor personally performed rain prayers	上诣黑龙潭祈雨。	The emperor went to the Black Dragon Pool to pray for rain.	1778.5.11	1778
433	History of the Qing Dynasty (清史稿)	The emperor personally performed rain prayers	上诣黑龙潭祈雨。	The emperor went to the Black Dragon Pool to pray for rain.	1787.6.6	1787
434	History of the Qing Dynasty (清史稿)	The emperor personally performed rain prayers	上诣黑龙潭祈雨。	The emperor went to the Black Dragon Pool to pray for rain.	1790.5.29	1790
435	History of the Qing Dynasty (清史稿)	The emperor personally performed rain prayers	上诣黑龙潭祈雨。命刑部清理庶狱，减徒以下罪。	The emperor visited the Black Dragon Pool to pray for rain. He ordered the Ministry of Justice to review criminal cases and reduce sentences for crimes punishable by penal servitude or lighter penalties.	1792.5.7	1792
436	History of the Qing Dynasty (清史稿)	The emperor personally performed rain prayers	上诣黑龙潭祈雨。	The emperor went to the Black Dragon Pool to pray for rain.	1794.5.19	1794
437	History of the Qing Dynasty (清史稿)	Imperial clan members were dispatched to perform rain prayers	五十九年夏四月壬戌，常雩，命皇八子仪郡王永璇代行礼。	In the summer of the fifty-ninth year, on the Renxu day of the fourth month, during the Changyu ceremony, the Emperor ordered his eighth son, Prince Yi Yongxuan, to perform the rites on his behalf.	1794	1794
438	History of the Qing Dynasty (清史稿)	The emperor personally performed rain prayers	上诣广润祠祈雨。	The emperor went to Guangrun Temple to pray for rain.	1795.6.14	1795
439	History of the Qing Dynasty (清史稿)	The emperor personally performed rain prayers	上侍太上皇帝祈雨黑龙潭。	To pray for rain at the Black Dragon Pool, he attended upon the Emperor Emeritus.	1796.5.28	1796
440	History of the Qing Dynasty (清史稿)	The emperor personally performed rain prayers	嘉庆元年夏四月辛巳，常雩，祀天於圜丘。	In the summer of the first year of the Jiaqing era, during the fourth month on the day Xinsi, the Changyu ceremony was held to worship heaven at the Circular Mound Altar.	1796	1796
441	History of the Qing Dynasty (清史稿)	The emperor personally performed rain prayers	嘉庆二年旱，祷雨既应，仁宗莅坛报祀，入坛中门降舆，至壝南门外，盥毕入，升坛。	In the second year of the Jiaqing era, during a drought, prayers for rain were answered. Emperor Renzong personally visited the altar to offer gratitude. He alighted from his carriage at the central gate of the altar compound, proceeded to the outer southern gate of the enclosure, performed ablutions, entered, and ascended the altar.	1797.1.28-1798.2.15	1797
442	History of the Qing Dynasty (清史稿)	The emperor personally performed rain prayers	嘉庆中，加“沛泽广生”。京畿旱，帝亲祷黑龙潭庙。	During the Jiaqing era, the title "Vast Life-Bestowing Beneficence" was added. When the capital region suffered a drought, the emperor personally prayed at the Black Dragon Pool Temple.	1796-1821	1802
443	History of the Qing Dynasty (清史稿)	The emperor personally performed rain prayers	上步祷祈雨。	A prayer ceremony was held to pray for rain.	1800.5.24-1800.6.21	1800
444	History of the Qing Dynasty (清史稿)	The emperor personally performed rain prayers	上步祷祈雨。	Offering prayers for rain.	1800.5.24-1800.6.21	1800
445	History of the Qing Dynasty (清史稿)	The emperor personally performed rain prayers	上祈雨。	Praying for rain.	1803.6.11	1803
446	History of the Qing Dynasty (清史稿)	The emperor personally performed rain prayers	上祈雨黑龙潭。	Offering prayers for rain at the Black Dragon Pool.	1804.6.13	1804
447	History of the Qing Dynasty (清史稿)	The emperor personally performed rain prayers	上祈雨。	Praying for rain.	1807.4.8-1807.5.7	1807
448	History of the Qing Dynasty (清史稿)	The emperor personally performed rain prayers	上祈雨。	Praying for rain.	1807.6.4	1807
449	History of the Qing Dynasty (清史稿)	The emperor personally performed rain prayers	上祈雨。	Praying for rain.	1811.6.7	1811
450	History of the Qing Dynasty (清史稿)	The emperor personally performed rain prayers	上再诣天神坛祈雨。	He went again to the Heavenly God altar to pray for rain.	1811.6.30	1811
451	History of the Qing Dynasty (清史稿)	The emperor personally performed rain prayers	上祈雨。	Praying for rain.	1813.5.17	1813
452	History of the Qing Dynasty (清史稿)	The emperor personally performed rain prayers	上祈雨。	Praying for rain.	1813.6.12	1813
453	History of the Qing Dynasty (清史稿)	The emperor personally performed rain prayers	上祈雨。	Praying for rain.	1817.7.2	1817
454	History of the Qing Dynasty (清史稿)	The emperor personally performed rain prayers	上祈雨。	Praying for rain.	1818.5.17	1818
455	History of the Qing Dynasty (清史稿)	The emperor personally performed rain prayers	上再祈雨。	Praying for rain again.	1818.5.25	1818
456	History of the Qing Dynasty (清史稿)	The emperor personally performed rain prayers	上祈雨。	Praying for rain.	1819.5.1	1817
457	History of the Qing Dynasty (清史稿)	The emperor personally performed rain prayers	上诣天神坛祈雨。	The emperor visited the Heavenly God Altar to pray for rain.	1819.6.10	1817
458	History of the Qing Dynasty (清史稿)	The emperor personally performed rain prayers	道光元年夏四月丙戌，常雩，祀天於圜丘，仁宗睿皇帝配享，自是岁以为常。	On the day Bingxu in the fourth month of summer in the first year of the Daoguang reign, the Great Rain Prayer was held, offering sacrifices to Heaven at the Circular Mound, with Emperor Renzongrui as the ancillary honored deity. This practice became an annual tradition from then on.	1821	1821
459	History of the Qing Dynasty (清史稿)	The emperor personally performed rain prayers	上诣大高殿祈雨。	The emperor went to the Dagaodian Temple to pray for rain.	1821.5.28	1821
460	History of the Qing Dynasty (清史稿)	The emperor personally performed rain prayers	上祷雨於觉生寺。	He prayed for rain at Juesheng Temple.	1823.6.3	1823
461	History of the Qing Dynasty (清史稿)	The emperor personally performed rain prayers	上诣黑龙潭祈雨。	The emperor went to the Black Dragon Pool to pray for rain.	1824.6.3	1824
462	History of the Qing Dynasty (清史稿)	The emperor personally performed rain prayers	上诣黑龙潭神祠祈雨。	The emperor visited the Black Dragon Pool Temple to pray for rain.	1826.5.19	1826
463	History of the Qing Dynasty (清史稿)	The emperor personally performed rain prayers	上诣黑龙潭祈雨。	The emperor went to the Black Dragon Pool to pray for rain.	1827.3.25	1827
464	History of the Qing Dynasty (清史稿)	The emperor personally performed rain prayers	上诣黑龙潭祈雨。	The emperor went to the Black Dragon Pool to pray for rain.	1827.4.17	1827
465	History of the Qing Dynasty (清史稿)	The emperor personally performed rain prayers	上诣黑龙潭祈雨。	The emperor went to the Black Dragon Pool to pray for rain.	1827.7.31	1827
466	History of the Qing Dynasty (清史稿)	The emperor personally performed rain prayers	上诣黑龙潭神祠祈雨。	The Emperor visited the Black Dragon Pool Shrine to pray for rain.	1831.6.1	1831
467	History of the Qing Dynasty (清史稿)	Officials were dispatched to perform rain prayers	祈雨。	Praying for rain.	1832.5.16	1832
468	History of the Qing Dynasty (清史稿)	The emperor personally performed rain prayers	上祈雨於黑龙潭。	Praying for rain at the Black Dragon Pool.	1832.6.12	1832
469	History of the Qing Dynasty (清史稿)	The emperor personally performed rain prayers	上诣天神坛祈雨。	The emperor went to the altar of the heavenly gods to pray for rain.	1832.6.20	1832
470	History of the Qing Dynasty (清史稿)	The emperor personally performed rain prayers	上步诣社稷坛祈雨。	The emperor proceeded to the Altar of Land and Grain to pray for rain.	1832.7.2	1832
471	History of the Qing Dynasty (清史稿)	The emperor personally performed rain prayers	上诣黑龙潭祈雨。	The emperor went to the Black Dragon Pool to pray for rain.	1832.7.9	1832
472	History of the Qing Dynasty (清史稿)	The emperor personally performed rain prayers	上步诣方泽祈雨。	He proceeded to the Square Moat to pray for rain.	1832.7.15	1832
473	History of the Qing Dynasty (清史稿)	The emperor personally performed rain prayers	道光十二年六月大雩，亲制祝文，省躬思过。是夕雨。报谢如常仪。御史陈焯请再申虔祷。	In the sixth month of the twelfth year of the Daoguang reign, a major rainmaking ceremony was held. The emperor personally composed a prayer, reflecting on his faults and examining his conduct. Rain fell that evening. Gratitude was expressed through the usual rituals. Censor Chen Zhuo requested another earnest prayer.	1832.6.28-1832.7.26	1832
474	History of the Qing Dynasty (清史稿)	The emperor personally performed rain prayers	上诣黑龙潭神祠祈雨。	The emperor visited the Black Dragon Pool shrine to pray for rain.	1835.5.25	1835
475	History of the Qing Dynasty (清史稿)	The emperor personally performed rain prayers	上复诣黑龙潭神祠祈雨。	He again went to the Black Dragon Pool to pray for rain at the shrine.	1835.6.14	1835
476	History of the Qing Dynasty (清史稿)	The emperor personally performed rain prayers	上诣黑龙潭祈雨。	The emperor went to the Black Dragon Pool to pray for rain.	1836.6.27	1836
477	History of the Qing Dynasty (清史稿)	The emperor personally performed rain prayers	上诣静明园龙王庙祈雨。	The Emperor visited the Dragon King Temple at Jingming Garden to pray for rain.	1836.7.8	1836
478	History of the Qing Dynasty (清史稿)	The emperor personally performed rain prayers	上诣黑龙潭祈雨。	The emperor went to the Black Dragon Pool to pray for rain.	1838.5.28	1838
479	History of the Qing Dynasty (清史稿)	The emperor personally performed rain prayers	上诣黑龙潭祈雨。	The emperor went to the Black Dragon Pool to pray for rain.	1838.6.27	1838
480	History of the Qing Dynasty (清史稿)	The emperor personally performed rain prayers	上诣万寿山殿祈雨。	The emperor went to the Longevity Hill Palace to pray for rain.	1839.6.4	1839
481	History of the Qing Dynasty (清史稿)	The emperor personally performed rain prayers	上诣黑龙潭祈雨。	The emperor went to the Black Dragon Pool to pray for rain.	1840.5.19	1840
482	History of the Qing Dynasty (清史稿)	The emperor personally performed rain prayers	上诣广润祠祈雨。	The emperor went to Guangrun Temple to pray for rain.	1840.5.29	1840
483	History of the Qing Dynasty (清史稿)	The emperor personally performed rain prayers	上诣黑龙潭神祠祈雨。	The emperor went to the Black Dragon Pool shrine to pray for rain.	1842.5.25	1842
484	History of the Qing Dynasty (清史稿)	The emperor personally performed rain prayers	上诣黑龙潭祈雨。	The emperor went to the Black Dragon Pool to pray for rain.	1845.5.21	1845
485	History of the Qing Dynasty (清史稿)	The emperor personally performed rain prayers	上再诣黑龙潭祈雨。	He went again to the Black Dragon Pool to pray for rain.	1845.7.1	1845
486	History of the Qing Dynasty (清史稿)	The emperor personally performed rain prayers	上诣黑龙潭祈雨。	The emperor went to the Black Dragon Pool to pray for rain.	1846.4.25	1846
487	History of the Qing Dynasty (清史稿)	The emperor personally performed rain prayers	上诣黑龙潭祈雨。	The emperor went to the Black Dragon Pool to pray for rain.	1846.5.16	1846
488	History of the Qing Dynasty (清史稿)	The emperor personally performed rain prayers	上诣黑龙潭祈雨。	The emperor went to the Black Dragon Pool to pray for rain.	1846.6.1	1846
489	History of the Qing Dynasty (清史稿)	The emperor personally performed rain prayers	上复诣黑龙潭祈雨。	He again went to the Black Dragon Pool to pray for rain.	1846.6.6	1846
490	History of the Qing Dynasty (清史稿)	The emperor personally performed rain prayers	上诣黑龙潭祈雨。	The Emperor went to the Black Dragon Pool to pray for rain.	1846.7.23	1846
491	History of the Qing Dynasty (清史稿)	The emperor personally performed rain prayers	上诣大高殿祈雨。	The emperor went to the Dagaodian Temple to pray for rain.	1851.6.28	1851
492	History of the Qing Dynasty (清史稿)	The emperor personally performed rain prayers	咸丰二年夏四月壬午，常雩，祀天於圜丘，恭奉宣宗成皇帝配享。	In the summer of the second year of Xianfeng's reign, on the Renwu day of the fourth month, the regular Yu sacrifice was performed at the Circular Mound Altar to honor Heaven, with the revered Emperor Xuanzong honored as a co-recipient.	1852	1852
493	History of the Qing Dynasty (清史稿)	The emperor personally performed rain prayers	上祈雨大高殿。	Praying for rain at the Grand High Temple.	1854.5.27-1854.6.24	1854
494	History of the Qing Dynasty (清史稿)	The emperor personally performed rain prayers	祈雨天神坛。	Altar of the Rain God.	1854.6.14	1854
495	History of the Qing Dynasty (清史稿)	The emperor personally performed rain prayers	上祈雨。	Praying for rain.	1859.4.16	1859
496	History of the Qing Dynasty (清史稿)	The emperor personally performed rain prayers	上再祈雨。	Pray again for rain.	1859.5.18	1859
497	History of the Qing Dynasty (清史稿)	The emperor personally performed rain prayers	上躬诣大高殿祈雨者三。	The emperor personally visited the Grand High Temple three times to pray for rain.	1862.3.30-1862.4.28	1862
498	History of the Qing Dynasty (清史稿)	The emperor personally performed rain prayers	上连诣大高殿祈雨。	He repeatedly visited the Dagaodian Temple to pray for rain.	1863.4.18-1863.5.17	1863
499	History of the Qing Dynasty (清史稿)	Officials were dispatched to perform rain prayers	连祈雨。免太仓等州县额赋。	Lian Qiyu. The tax quotas of Taicang and other counties and prefectures were exempted.	1863.5.18-1863.6.15	1863
500	History of the Qing Dynasty (清史稿)	The emperor personally performed rain prayers	自三月不雨以来，上频祈雨。	Since the drought began in March, the emperor has frequently prayed for rain.	1867.7.28	1867
501	History of the Qing Dynasty (清史稿)	The emperor personally performed rain prayers	自春正月不雨至於是月，上频祷祈。	From the first month of spring until this month, no rain has fallen, and the emperor has frequently offered prayers for rain.	1869.7.4	1869
502	History of the Qing Dynasty (清史稿)	The emperor personally performed rain prayers	自春初至於是月，上连祈雨。	From early spring until this month, the emperor repeatedly prayed for rain.	1871.5.6	1871
503	History of the Qing Dynasty (清史稿)	Officials were dispatched to perform rain prayers	祈雨。自是频祈雨。	Praying for rain. Since then, prayers for rain have become frequent.	1876.2.18	1876
504	History of the Qing Dynasty (清史稿)	The emperor personally performed rain prayers	光绪三年夏四月辛卯，常雩，祀天於圜丘。	On the day Xīn Mǎo in the fourth month of summer in the third year of the Guangxu reign, the regular Yu sacrifice was performed to honor Heaven at the Circular Mound.	1877	1877
505	History of the Qing Dynasty (清史稿)	The emperor personally performed rain prayers	光绪十三年夏四月丙子，常雩，祀天於圜丘。	On the summer month of April, Bingzi day, in the 13th year of Guangxu's reign, the Changyu ceremony was held to worship heaven at the Circular Mound Altar.	1887	1887
506	History of the Qing Dynasty (清史稿)	Imperial clan members were dispatched to perform rain prayers	祈雨。	Pray for rain.	1887.5.4	1887
507	History of the Qing Dynasty (清史稿)	Imperial clan members were dispatched to perform rain prayers	祈雨。	Pray for rain.	1888.6.25	1888
508	History of the Qing Dynasty (清史稿)	The emperor personally performed rain prayers	上诣大高殿祈雨。	The Emperor went to the Dagaodian Temple to pray for rain.	1890.6.27	1890
509	History of the Qing Dynasty (清史稿)	Imperial clan members were dispatched to perform rain prayers	祈雨。	Praying for rain.	1892.6.7	1892
510	History of the Qing Dynasty (清史稿)	Imperial clan members were dispatched to perform rain prayers	祈雨。	Pray for rain.	1892.6.27	1892
511	History of the Qing Dynasty (清史稿)	The emperor personally performed rain prayers	光绪二十八年夏四月甲午，常雩祀天。	On the jiawu day of the fourth summer month in the twenty-eighth year of the Guangxu reign, the Heaven Worship Ceremony was held.	1902	1902
512	History of the Qing Dynasty (清史稿)	Imperial clan members were dispatched to perform rain prayers	祈雨。	Pray for rain.	1907.5.30	1907
513	History of the Qing Dynasty (清史稿)	Officials were dispatched to perform rain prayers	祈雨	Pray for Rain	1909.6.4	1909
514	History of the Qing Dynasty (清史稿)	Officials were dispatched to perform rain prayers	复祈雨。	Pray again for rain.	1909.6.13	1909
515	History of the Qing Dynasty (清史稿)	Officials were dispatched to perform rain prayers	复祈雨。	Praying for rain again.	1909.6.23	1909
516	History of the Qing Dynasty (清史稿)	Officials were dispatched to perform rain prayers	复祈雨。	Pray again for rain.	1909.7.4	1909
517	History of the Qing Dynasty (清史稿)	Officials were dispatched to perform rain prayers	祈雨。	Pray for rain.	1910.4.22	1910
