# Supplementary material for: Analysis of the Relationship between Official Rain-Praying Rituals and Droughts in China over the Past 2000 Years
Source: Copernicus journal article supplement (doi:10.5194/egusphere-2026-187), 2026-02-19
Supplement: Supplementary file 2 [file Table S2.xlsx]

## Sheet: Sequence Data
Western Han to Yuan Dynasties	Number of Droughts from Western Han to Yuan Dynasties	10a Rain-Praying Frequency from Western Han to Yuan Dynasties	Ming Dynasty	Number of Counties Affected by Drought in Ming Dynasty	Rain-Praying Frequency in Ming Dynasty	Qing Dynasty	Droughts in Qing Dynasty	Rain-Praying Frequency in Qing Dynasty
-190	2	0	1368	8	0	1644	53	1
-180	0	0	1369	19	0	1645	17	0
-170	2	0	1370	16	1	1646	105	0
-160	0	0	1371	26	0	1647	44	0
-150	3	0	1372	9	0	1648	27	0
-140	4	1	1373	8	0	1649	24	0
-130	1	0	1374	75	1	1650	34	0
-120	3	1	1375	18	0	1651	36	0
-110	1	1	1376	14	0	1652	134	1
-100	8	0	1377	0	0	1653	51	0
-90	3	0	1378	18	0	1654	40	0
-80	1	1	1379	2	0	1655	75	0
-70	4	0	1380	4	0	1656	42	3
-60	1	0	1381	2	0	1657	62	2
-50	0	0	1382	5	0	1658	17	0
-40	1	0	1383	3	0	1659	58	3
-30	1	0	1384	2	0	1660	48	2
-20	1	0	1385	10	0	1661	95	1
-10	3	0	1386	6	0	1662	66	0
-1	2	0	1387	10	0	1663	54	1
1	1	0	1388	1	0	1664	84	1
10	5	0	1389	8	0	1665	189	0
20	5	1	1390	12	0	1666	64	0
30	3	0	1391	4	0	1667	71	1
40	5	0	1392	8	0	1668	24	1
50	2	0	1393	8	0	1669	29	2
60	3	2	1394	1	0	1670	97	2
70	10	1	1395	2	0	1671	235	0
80	6	1	1396	5	0	1672	65	1
90	8	1	1397	3	0	1673	47	0
100	8	1	1398	2	0	1674	77	1
110	9	1	1399	2	0	1675	18	0
120	5	0	1400	0	0	1676	8	0
130	12	5	1401	4	0	1677	30	1
140	3	2	1402	2	0	1678	100	2
150	3	1	1403	10	0	1679	247	2
160	4	1	1404	6	0	1680	83	1
170	2	1	1405	5	0	1681	75	1
180	2	0	1406	7	0	1682	31	1
190	6	0	1407	2	0	1683	43	0
200	1	0	1408	3	0	1684	69	0
210	1	2	1409	4	0	1685	36	0
220	2	0	1410	3	0	1686	45	4
230	5	1	1411	1	0	1687	38	0
240	3	0	1412	1	0	1688	44	5
250	5	0	1413	3	0	1689	111	0
260	1	0	1414	5	0	1690	105	0
270	6	4	1415	14	0	1691	119	0
280	11	2	1416	7	0	1692	64	1
290	3	0	1417	4	0	1693	77	0
300	5	0	1418	2	0	1694	16	0
310	5	1	1419	2	0	1695	28	0
320	8	0	1420	2	0	1696	65	0
330	9	3	1421	5	0	1697	60	0
340	5	1	1422	2	0	1698	23	0
350	8	1	1423	5	0	1699	25	0
360	5	0	1424	4	0	1700	16	0
370	8	0	1425	10	1	1701	24	0
380	4	0	1426	22	0	1702	37	0
390	10	0	1427	40	0	1703	70	0
400	10	0	1428	53	1	1704	42	0
410	7	0	1429	4	0	1705	22	2
420	7	0	1430	19	0	1706	41	0
430	7	3	1431	10	0	1707	63	0
440	6	0	1432	8	1	1708	60	0
450	6	0	1433	105	1	1709	21	0
460	15	0	1434	73	0	1710	35	3
470	6	3	1435	10	2	1711	35	0
480	18	2	1436	7	0	1712	25	0
490	10	3	1437	21	0	1713	35	1
500	14	3	1438	30	0	1714	97	0
510	11	2	1439	13	2	1715	28	4
520	8	1	1440	43	1	1716	68	1
530	8	1	1441	39	1	1717	11	2
540	5	0	1442	41	0	1718	26	0
550	7	5	1443	67	2	1719	36	3
560	9	3	1444	20	2	1720	100	2
570	5	1	1445	9	0	1721	233	1
580	8	4	1446	20	0	1722	130	1
590	3	1	1447	21	0	1723	93	1
600	1	0	1448	21	1	1724	31	3
610	3	1	1449	18	1	1725	35	0
620	11	1	1450	13	1	1726	21	0
630	8	0	1451	24	0	1727	21	0
640	7	0	1452	7	0	1728	34	0
650	13	2	1453	30	2	1729	33	3
660	9	0	1454	17	0	1730	18	2
670	13	1	1455	89	2	1731	16	3
680	14	0	1456	59	0	1732	29	1
690	5	1	1457	40	1	1733	22	0
700	12	1	1458	18	3	1734	10	1
710	15	2	1459	122	0	1735	39	0
720	10	2	1460	15	1	1736	29	4
730	2	0	1461	14	0	1737	34	6
740	2	0	1462	11	0	1738	83	3
750	6	2	1463	9	0	1739	38	4
760	13	1	1464	3	0	1740	14	2
770	12	5	1465	19	0	1741	28	4
780	12	1	1466	14	0	1742	62	4
790	17	3	1467	35	1	1743	103	5
800	18	1	1468	35	2	1744	56	7
810	7	0	1469	15	0	1745	59	9
820	15	1	1470	74	4	1746	25	7
830	26	1	1471	32	0	1747	58	5
840	5	0	1472	35	0	1748	85	2
850	6	0	1473	28	3	1749	19	5
860	9	2	1474	14	0	1750	30	1
870	5	0	1475	9	1	1751	100	7
880	5	0	1476	20	0	1752	63	12
890	1	0	1477	28	0	1753	37	8
900	10	1	1478	30	0	1754	10	1
910	6	6	1479	28	0	1755	21	3
920	12	4	1480	15	0	1756	26	1
930	15	4	1481	27	2	1757	28	6
940	18	13	1482	49	1	1758	39	13
950	2	1	1483	31	0	1759	83	1
960	26	15	1484	100	0	1760	28	1
970	13	8	1485	119	2	1761	8	1
980	22	5	1486	61	2	1762	15	4
990	33	14	1487	92	3	1763	8	2
1000	16	11	1488	69	1	1764	18	1
1010	21	2	1489	16	1	1765	26	5
1020	14	1	1490	23	0	1766	7	4
1030	14	1	1491	29	0	1767	13	5
1040	8	13	1492	42	0	1768	77	2
1050	8	3	1493	66	2	1769	19	9
1060	17	10	1494	22	0	1770	21	7
1070	33	7	1495	65	0	1771	24	2
1080	23	4	1496	2	0	1772	34	1
1090	14	4	1497	22	1	1773	18	3
1100	12	1	1498	71	0	1774	70	4
1110	11	2	1499	30	0	1775	65	2
1120	10	1	1500	30	0	1776	48	9
1130	36	6	1501	34	0	1777	85	29
1140	19	3	1502	31	0	1778	222	1
1150	6	1	1503	49	0	1779	29	3
1160	25	9	1504	26	2	1780	19	3
1170	50	5	1505	77	0	1781	50	4
1180	55	12	1506	35	0	1782	33	8
1190	46	23	1507	43	0	1783	32	9
1200	55	29	1508	120	0	1784	53	20
1210	36	13	1509	87	2	1785	247	9
1220	21	12	1510	19	0	1786	116	9
1230	8	6	1511	37	0	1787	48	9
1240	15	10	1512	94	1	1788	27	5
1250	9	5	1513	46	1	1789	30	7
1260	16	11	1514	26	1	1790	14	5
1270	24	2	1515	20	0	1791	20	18
1280	23	2	1516	30	3	1792	77	3
1290	42	3	1517	26	0	1793	15	11
1300	28	4	1518	25	0	1794	117	6
1310	23	5	1519	32	0	1795	36	9
1320	76	4	1520	69	0	1796	26	12
1330	35	1	1521	52	2	1797	24	8
1340	15	3	1522	34	2	1798	28	1
1350	45	1	1523	172	2	1799	9	3
1360	9	1	1524	47	0	1800	38	4
			1525	15	0	1801	13	7
			1526	97	0	1802	129	8
			1527	47	3	1803	22	5
			1528	164	0	1804	39	8
			1529	72	4	1805	52	3
			1530	31	2	1806	33	18
			1531	39	2	1807	109	6
			1532	84	2	1808	39	2
			1533	27	1	1809	30	5
			1534	39	0	1810	49	13
			1535	40	0	1811	129	9
			1536	48	0	1812	66	14
			1537	33	0	1813	123	9
			1538	53	3	1814	137	6
			1539	59	0	1815	18	1
			1540	50	1	1816	23	11
			1541	55	1	1817	54	11
			1542	14	1	1818	20	13
			1543	30	3	1819	44	5
			1544	186	1	1820	147	2
			1545	147	1	1821	40	1
			1546	33	1	1822	24	5
			1547	28	1	1823	16	6
			1548	13	0	1824	40	4
			1549	29	2	1825	52	4
			1550	63	3	1826	47	12
			1551	20	2	1827	27	8
			1552	25	1	1828	39	4
			1553	37	1	1829	47	4
			1554	35	0	1830	40	12
			1555	32	0	1831	29	13
			1556	14	0	1832	90	7
			1557	8	1	1833	39	5
			1558	17	1	1834	50	5
			1559	57	1	1835	228	9
			1560	103	1	1836	74	4
			1561	47	3	1837	54	9
			1562	22	1	1838	36	10
			1563	23	0	1839	49	9
			1564	15	2	1840	23	4
			1565	31	1	1841	11	4
			1566	15	1	1842	24	4
			1567	12	0	1843	8	3
			1568	74	0	1844	20	5
			1569	18	0	1845	32	5
			1570	76	1	1846	93	5
			1571	8	0	1847	83	4
			1572	25	1	1848	16	2
			1573	31	5	1849	25	1
			1574	15	0	1850	30	1
			1575	32	3	1851	24	3
			1576	7	0	1852	40	1
			1577	17	1	1853	26	5
			1578	18	0	1854	27	2
			1579	31	0	1855	42	4
			1580	20	0	1856	215	2
			1581	24	1	1857	72	1
			1582	61	4	1858	43	6
			1583	63	0	1859	60	2
			1584	34	1	1860	27	2
			1585	92	6	1861	21	4
			1586	119	2	1862	39	7
			1587	130	2	1863	34	3
			1588	162	1	1864	77	8
			1589	188	1	1865	50	6
			1590	85	2	1866	53	11
			1591	15	1	1867	110	1
			1592	18	1	1868	27	11
			1593	37	0	1869	67	7
			1594	20	0	1870	67	8
			1595	33	0	1871	70	1
			1596	39	0	1872	39	2
			1597	18	0	1873	49	1
			1598	49	2	1874	40	6
			1599	39	3	1875	72	16
			1600	25	4	1876	174	8
			1601	53	1	1877	279	19
			1602	14	0	1878	111	14
			1603	13	1	1879	37	4
			1604	17	1	1880	30	3
			1605	39	0	1881	18	2
			1606	36	1	1882	21	4
			1607	36	1	1883	17	7
			1608	51	1	1884	32	6
			1609	124	1	1885	35	1
			1610	121	2	1886	41	3
			1611	64	1	1887	36	4
			1612	16	0	1888	41	5
			1613	23	0	1889	19	9
			1614	46	1	1890	20	4
			1615	129	5	1891	45	4
			1616	58	0	1892	74	1
			1617	133	8	1893	24	2
			1618	50	1	1894	35	1
			1619	38	1	1895	59	1
			1620	25	0	1896	24	1
			1621	34	1	1897	24	4
			1622	8	2	1898	44	7
			1623	16	0	1899	63	6
			1624	50	0	1900	154	2
			1625	46	0	1901	42	3
			1626	53	2	1902	85	9
			1627	29	1	1903	23	2
			1628	64	1	1904	16	2
			1629	48	1	1905	16	3
			1630	31	1	1906	33	6
			1631	34	1	1907	36	4
			1632	38	0	1908	34	5
			1633	62	0	1909	30	2
			1634	49	0	1910	18	1
			1635	43	0	1911	4	0
			1636	85	0
			1637	48	0
			1638	99	0
			1639	131	0
			1640	320	1
			1641	169	0
			1642	49	0
			1643	84	0
